# Supplementary material for: Effects of low temperature at stem elongation stage on the development, morphology, and physicochemical properties of wheat starch
Source: PeerJ journal article supplement (doi:10.7717/peerj.9672), 2020-08-12
Supplement: Supplementary_files_1.xlsx [file Supplementary_files_1.xlsx]

## Sheet: Granule size distribution
	Frequency (%)
Graunle size (μm)	NTT	LTT
1	12.1479	14.0206
3	42.6056	35
5	27.9489	29.1237
7	8.84683	11.0309
9	2.46479	3.29897
11	0.9243	0.87629
13	0.74824	0.92784
15	0.70423	1.03093
17	0.6162	1.23711
19	0.44014	1.13402
21	0.79225	0.51546
23	0.35211	0.51546
25	0.35211	0.72165
27	0.3081	0.30928
29	0.39613	0.10309
31	0.17606	0.05155
33	0.13204	0.10309
35	0.04401	0

## Sheet: Proportion of A,B,C-type starch
Types	NTT	std	LTT	std
C-	71.743	0.95	66.2887	1.24
B-	22.2711	1.1	26.1856	1.13
A-	5.98592	0.31	7.52577	0.12

## Sheet: Swelling power and solubility
	Temperature (℃)	NTT	std	LTT	std
Swelling power	60	12.6748	0.56598	12.968	0.12394
	70	25.2662	0.56209	26.8833	0.66997
	80	32.2069	0.86476	34.2219	0.73272
	90	34.5113	1.66236	37.131	0.2321
	100	35.3642	0.10008	37.2418	0.40649
	Temperature (℃)	NTT	std	LTT	std
Solubility	60	4.52028	0.2127	4.31427	0.41061
	70	13.0258	0.29374	12.7148	0.83845
	80	16.6871	0.29469	15.9398	0.12428
	90	19.3899	0.30475	18.4417	0.28563
	100	21.158	0.26332	19.7489	0.39085

## Sheet: XRD spectra
Angle 2θ	NTT	LTT
3.0001	330	224
3.02053	352	208
3.04096	336	203
3.06139	336	193
3.08183	315	224
3.10226	334	197
3.12269	292	175
3.14312	290	168
3.16355	299	190
3.18398	275	186
3.20442	251	168
3.22485	258	195
3.24528	254	138
3.26571	256	137
3.28614	265	164
3.30657	235	171
3.327	248	155
3.34743	259	161
3.36787	232	156
3.3883	215	145
3.40873	233	160
3.42916	226	147
3.44959	229	148
3.47002	236	151
3.49046	196	153
3.51089	191	163
3.53132	208	162
3.55175	182	138
3.57218	199	148
3.59261	204	140
3.61304	174	147
3.63348	187	132
3.65391	177	141
3.67434	165	143
3.69477	178	141
3.7152	208	128
3.73563	169	151
3.75606	195	154
3.7765	159	148
3.79693	191	138
3.81736	154	140
3.83779	150	141
3.85822	158	127
3.87865	166	157
3.89908	177	129
3.91952	162	126
3.93995	159	119
3.96038	142	125
3.98081	158	145
4.00124	152	150
4.02167	162	138
4.04211	170	145
4.06254	141	118
4.08297	124	132
4.1034	157	148
4.12383	145	129
4.14426	159	145
4.16469	155	122
4.18513	157	127
4.20556	152	118
4.22599	161	142
4.24642	150	135
4.26685	162	143
4.28728	176	133
4.30771	178	143
4.32815	141	137
4.34858	141	146
4.36901	151	145
4.38944	145	128
4.40987	146	131
4.4303	173	130
4.45073	157	147
4.47117	129	132
4.4916	154	123
4.51203	157	134
4.53246	142	147
4.55289	159	132
4.57332	122	136
4.59376	166	142
4.61419	184	148
4.63462	178	126
4.65505	140	160
4.67548	164	143
4.69591	152	150
4.71634	155	144
4.73678	147	134
4.75721	166	137
4.77764	147	156
4.79807	141	159
4.8185	137	147
4.83893	136	125
4.85937	149	149
4.8798	146	131
4.90023	165	137
4.92066	157	134
4.94109	144	165
4.96152	161	129
4.98195	159	142
5.00239	155	183
5.02282	170	174
5.04325	156	153
5.06368	161	149
5.08411	187	144
5.10454	127	162
5.12497	171	171
5.14541	139	164
5.16584	163	174
5.18627	160	164
5.2067	184	172
5.22713	163	169
5.24756	174	161
5.26799	150	160
5.28843	171	164
5.30886	163	166
5.32929	183	181
5.34972	175	186
5.37015	148	195
5.39058	156	173
5.41101	160	190
5.43145	174	172
5.45188	161	211
5.47231	180	163
5.49274	169	164
5.51317	191	207
5.5336	177	158
5.55403	168	176
5.57447	165	177
5.5949	179	155
5.61533	193	180
5.63576	165	181
5.65619	208	178
5.67662	172	164
5.69705	192	177
5.71749	171	173
5.73792	195	190
5.75835	188	170
5.77878	183	207
5.79921	172	188
5.81964	195	201
5.84008	183	178
5.86051	150	204
5.88094	176	162
5.90137	183	200
5.9218	174	172
5.94223	187	177
5.96267	185	185
5.9831	182	181
6.00353	208	163
6.02396	211	189
6.04439	191	190
6.06482	219	185
6.08525	198	186
6.10569	187	211
6.12612	209	151
6.14655	219	203
6.16698	198	193
6.18741	192	182
6.20784	202	193
6.22827	209	184
6.24871	188	182
6.26914	211	215
6.28957	171	197
6.31	195	178
6.33043	217	194
6.35086	193	201
6.37129	200	179
6.39173	184	200
6.41216	211	195
6.43259	203	177
6.45302	203	180
6.47345	192	203
6.49388	214	209
6.51431	201	207
6.53475	222	192
6.55518	194	212
6.57561	202	220
6.59604	208	192
6.61647	226	229
6.6369	191	230
6.65733	181	237
6.67777	200	200
6.6982	177	216
6.71863	199	192
6.73906	228	229
6.75949	225	219
6.77992	219	227
6.80035	197	210
6.82079	210	241
6.84122	216	215
6.86165	207	211
6.88208	202	212
6.90251	215	232
6.92294	214	206
6.94338	223	224
6.96381	226	208
6.98424	210	230
7.00467	237	250
7.0251	242	213
7.04553	220	219
7.06597	198	226
7.0864	207	240
7.10683	234	220
7.12726	220	230
7.14769	249	203
7.16812	236	210
7.18855	231	230
7.20899	241	216
7.22942	230	239
7.24985	214	235
7.27028	230	234
7.29071	205	210
7.31114	237	213
7.33157	230	243
7.35201	230	219
7.37244	231	226
7.39287	228	217
7.4133	231	226
7.43373	224	231
7.45416	224	233
7.47459	219	221
7.49503	233	248
7.51546	238	214
7.53589	213	237
7.55632	253	235
7.57675	254	208
7.59718	217	237
7.61761	243	240
7.63805	235	226
7.65848	249	248
7.67891	242	242
7.69934	249	239
7.71977	242	258
7.7402	234	248
7.76063	246	232
7.78107	222	223
7.8015	211	268
7.82193	254	223
7.84236	247	220
7.86279	252	240
7.88322	254	284
7.90365	228	247
7.92409	234	261
7.94452	232	261
7.96495	254	246
7.98538	220	238
8.00581	239	257
8.02624	252	261
8.04668	263	258
8.06711	239	247
8.08754	243	246
8.10797	266	266
8.1284	263	251
8.14883	258	226
8.16926	233	254
8.1897	228	280
8.21013	246	248
8.23056	245	255
8.25099	262	240
8.27142	241	259
8.29185	262	223
8.31228	266	250
8.33272	288	268
8.35315	259	298
8.37358	282	275
8.39401	250	249
8.41444	240	256
8.43487	276	257
8.4553	279	290
8.47574	287	288
8.49617	252	283
8.5166	245	268
8.53703	261	261
8.55746	274	249
8.57789	293	268
8.59833	272	288
8.61876	282	261
8.63919	265	250
8.65962	265	278
8.68005	272	258
8.70048	236	279
8.72091	273	265
8.74135	275	259
8.76178	271	286
8.78221	255	282
8.80264	273	282
8.82307	303	272
8.8435	268	284
8.86393	271	290
8.88437	272	282
8.9048	256	256
8.92523	277	270
8.94566	265	290
8.96609	283	265
8.98652	287	298
9.00695	280	265
9.02739	292	265
9.04782	271	310
9.06825	265	299
9.08868	273	284
9.10911	291	270
9.12954	303	300
9.14998	273	286
9.17041	299	312
9.19084	290	274
9.21127	270	277
9.2317	296	262
9.25213	333	314
9.27257	307	296
9.293	289	302
9.31343	308	290
9.33386	269	289
9.35429	295	278
9.37472	326	295
9.39515	323	302
9.41559	305	287
9.43602	319	280
9.45645	302	305
9.47688	329	301
9.49731	314	310
9.51774	343	281
9.53817	314	308
9.55861	327	307
9.57904	291	287
9.59947	297	299
9.6199	282	306
9.64033	299	285
9.66076	323	307
9.68119	292	314
9.70163	339	313
9.72206	334	330
9.74249	301	308
9.76292	309	364
9.78335	312	314
9.80378	351	342
9.82422	321	306
9.84465	319	322
9.86508	329	330
9.88551	339	342
9.90594	303	335
9.92637	339	311
9.9468	342	344
9.96724	341	361
9.98767	342	348
10.0081	346	341
10.0285	331	358
10.049	344	324
10.0694	333	329
10.0898	353	353
10.1103	352	319
10.1307	366	344
10.1511	323	346
10.1715	330	346
10.192	313	324
10.2124	339	302
10.2328	342	331
10.2533	321	316
10.2737	345	345
10.2941	295	361
10.3146	309	316
10.335	346	320
10.3554	356	345
10.3759	338	321
10.3963	316	302
10.4167	347	306
10.4372	317	299
10.4576	351	314
10.478	324	317
10.4985	326	313
10.5189	349	339
10.5393	350	316
10.5597	330	324
10.5802	311	325
10.6006	367	355
10.621	350	370
10.6415	308	326
10.6619	328	346
10.6823	386	336
10.7028	333	345
10.7232	335	350
10.7436	349	353
10.7641	351	341
10.7845	369	326
10.8049	371	336
10.8254	357	320
10.8458	369	317
10.8662	323	362
10.8867	355	336
10.9071	351	343
10.9275	367	364
10.9479	361	347
10.9684	357	365
10.9888	371	355
11.0092	366	355
11.0297	362	340
11.0501	420	380
11.0705	377	340
11.091	402	367
11.1114	387	358
11.1318	350	375
11.1523	382	335
11.1727	382	366
11.1931	367	332
11.2136	376	363
11.234	397	384
11.2544	401	337
11.2749	399	333
11.2953	409	391
11.3157	394	328
11.3361	398	366
11.3566	364	388
11.377	385	371
11.3974	422	351
11.4179	384	369
11.4383	371	376
11.4587	396	330
11.4792	377	367
11.4996	376	379
11.52	373	337
11.5405	370	358
11.5609	414	369
11.5813	376	367
11.6018	359	393
11.6222	373	355
11.6426	363	368
11.663	385	369
11.6835	355	356
11.7039	334	337
11.7243	357	348
11.7448	406	392
11.7652	348	376
11.7856	333	390
11.8061	372	386
11.8265	397	416
11.8469	361	374
11.8674	394	376
11.8878	398	378
11.9082	385	332
11.9287	447	365
11.9491	395	363
11.9695	370	364
11.99	381	382
12.0104	340	365
12.0308	355	374
12.0512	372	339
12.0717	412	356
12.0921	378	364
12.1125	399	367
12.133	348	379
12.1534	375	339
12.1738	376	363
12.1943	423	385
12.2147	383	398
12.2351	340	378
12.2556	376	378
12.276	367	333
12.2964	366	414
12.3169	389	357
12.3373	381	384
12.3577	372	356
12.3781	411	367
12.3986	382	379
12.419	353	358
12.4394	380	373
12.4599	386	361
12.4803	389	380
12.5007	387	341
12.5212	424	363
12.5416	411	399
12.562	370	398
12.5825	357	382
12.6029	375	400
12.6233	364	361
12.6438	384	376
12.6642	444	396
12.6846	404	423
12.7051	366	427
12.7255	437	424
12.7459	405	372
12.7663	364	374
12.7868	391	399
12.8072	411	397
12.8276	364	361
12.8481	377	408
12.8685	395	389
12.8889	361	450
12.9094	394	370
12.9298	377	409
12.9502	409	385
12.9707	377	394
12.9911	379	356
13.0115	389	399
13.032	373	361
13.0524	405	414
13.0728	419	405
13.0933	398	412
13.1137	382	395
13.1341	390	344
13.1545	392	412
13.175	402	341
13.1954	407	387
13.2158	397	432
13.2363	363	367
13.2567	409	334
13.2771	386	368
13.2976	356	368
13.318	431	354
13.3384	405	377
13.3589	413	382
13.3793	401	393
13.3997	407	374
13.4202	422	342
13.4406	376	380
13.461	394	405
13.4815	409	385
13.5019	365	402
13.5223	434	387
13.5427	386	412
13.5632	407	376
13.5836	407	376
13.604	398	439
13.6245	387	403
13.6449	399	377
13.6653	395	366
13.6858	354	404
13.7062	399	365
13.7266	378	400
13.7471	418	425
13.7675	375	359
13.7879	390	380
13.8084	397	421
13.8288	376	369
13.8492	403	403
13.8696	401	427
13.8901	397	410
13.9105	389	405
13.9309	430	414
13.9514	400	378
13.9718	411	450
13.9922	431	425
14.0127	432	401
14.0331	436	392
14.0535	393	384
14.074	400	428
14.0944	434	411
14.1148	446	439
14.1353	492	420
14.1557	434	434
14.1761	459	395
14.1966	443	417
14.217	410	444
14.2374	430	417
14.2578	459	427
14.2783	458	426
14.2987	469	450
14.3191	450	464
14.3396	448	445
14.36	462	475
14.3804	429	441
14.4009	427	485
14.4213	444	449
14.4417	463	448
14.4622	469	463
14.4826	473	482
14.503	521	476
14.5235	473	470
14.5439	467	452
14.5643	459	474
14.5847	486	425
14.6052	488	471
14.6256	510	462
14.646	558	500
14.6665	554	496
14.6869	505	522
14.7073	550	445
14.7278	545	505
14.7482	520	486
14.7686	544	523
14.7891	531	516
14.8095	550	540
14.8299	562	537
14.8504	555	515
14.8708	537	547
14.8912	564	574
14.9117	593	538
14.9321	609	572
14.9525	560	582
14.9729	583	611
14.9934	611	537
15.0138	582	602
15.0342	600	607
15.0547	607	610
15.0751	613	610
15.0955	657	577
15.116	649	610
15.1364	638	543
15.1568	596	619
15.1773	581	553
15.1977	610	571
15.2181	623	612
15.2386	557	590
15.259	552	591
15.2794	614	565
15.2999	575	598
15.3203	584	608
15.3407	582	561
15.3611	566	584
15.3816	572	592
15.402	558	528
15.4224	558	519
15.4429	557	541
15.4633	542	519
15.4837	539	506
15.5042	546	556
15.5246	564	546
15.545	550	502
15.5655	535	532
15.5859	534	530
15.6063	507	480
15.6268	515	503
15.6472	475	549
15.6676	532	459
15.6881	512	508
15.7085	496	487
15.7289	509	490
15.7493	472	480
15.7698	484	474
15.7902	452	502
15.8106	490	475
15.8311	487	481
15.8515	524	491
15.8719	416	470
15.8924	485	473
15.9128	513	497
15.9332	513	483
15.9537	484	482
15.9741	483	504
15.9945	431	521
16.015	499	487
16.0354	484	517
16.0558	492	500
16.0762	478	475
16.0967	446	491
16.1171	487	479
16.1375	462	508
16.158	460	467
16.1784	504	468
16.1988	487	520
16.2193	485	493
16.2397	503	444
16.2601	510	496
16.2806	521	518
16.301	542	523
16.3214	518	518
16.3419	520	528
16.3623	534	470
16.3827	508	529
16.4032	546	529
16.4236	516	500
16.444	527	521
16.4644	580	523
16.4849	538	489
16.5053	596	524
16.5257	576	533
16.5462	560	584
16.5666	587	543
16.587	545	505
16.6075	530	533
16.6279	570	601
16.6483	582	561
16.6688	563	567
16.6892	588	589
16.7096	579	569
16.7301	605	598
16.7505	632	595
16.7709	611	565
16.7914	611	675
16.8118	605	616
16.8322	575	656
16.8526	598	595
16.8731	644	627
16.8935	643	668
16.9139	604	610
16.9344	628	618
16.9548	634	630
16.9752	674	639
16.9957	654	611
17.0161	675	671
17.0365	685	647
17.057	661	662
17.0774	679	649
17.0978	664	661
17.1183	704	640
17.1387	665	614
17.1591	713	691
17.1795	661	691
17.2	667	593
17.2204	636	618
17.2408	680	662
17.2613	679	623
17.2817	642	647
17.3021	637	592
17.3226	626	653
17.343	657	604
17.3634	658	565
17.3839	658	635
17.4043	671	608
17.4247	661	642
17.4452	641	641
17.4656	635	642
17.486	608	613
17.5065	624	563
17.5269	601	673
17.5473	617	655
17.5677	611	595
17.5882	655	612
17.6086	617	612
17.629	618	641
17.6495	626	588
17.6699	609	618
17.6903	616	590
17.7108	674	653
17.7312	624	611
17.7516	649	646
17.7721	623	575
17.7925	657	659
17.8129	612	666
17.8334	630	655
17.8538	616	604
17.8742	687	657
17.8946	640	623
17.9151	664	621
17.9355	614	628
17.9559	615	676
17.9764	704	694
17.9968	647	677
18.0172	675	678
18.0377	679	595
18.0581	662	598
18.0785	684	627
18.099	677	632
18.1194	642	648
18.1398	671	621
18.1603	623	675
18.1807	681	661
18.2011	712	636
18.2216	627	628
18.242	644	640
18.2624	607	614
18.2828	631	620
18.3033	659	595
18.3237	569	601
18.3441	578	611
18.3646	611	618
18.385	568	586
18.4054	647	601
18.4259	637	578
18.4463	562	579
18.4667	564	610
18.4872	567	572
18.5076	562	619
18.528	594	518
18.5485	559	596
18.5689	541	514
18.5893	532	540
18.6098	497	543
18.6302	564	551
18.6506	528	558
18.671	570	506
18.6915	520	558
18.7119	499	489
18.7323	554	533
18.7528	542	531
18.7732	527	503
18.7936	508	497
18.8141	501	507
18.8345	540	505
18.8549	551	478
18.8754	537	510
18.8958	530	528
18.9162	509	533
18.9367	525	499
18.9571	509	497
18.9775	476	500
18.9979	491	467
19.0184	511	470
19.0388	468	467
19.0592	511	504
19.0797	493	473
19.1001	488	504
19.1205	500	485
19.141	505	455
19.1614	496	482
19.1818	491	462
19.2023	492	469
19.2227	473	482
19.2431	496	490
19.2636	439	483
19.284	502	480
19.3044	480	474
19.3249	526	467
19.3453	496	461
19.3657	455	492
19.3861	510	541
19.4066	524	431
19.427	456	452
19.4474	478	479
19.4679	473	480
19.4883	483	443
19.5087	460	467
19.5292	497	452
19.5496	506	451
19.57	503	484
19.5905	486	514
19.6109	470	477
19.6313	492	459
19.6518	494	477
19.6722	500	484
19.6926	526	516
19.7131	491	517
19.7335	501	505
19.7539	491	462
19.7743	515	493
19.7948	469	477
19.8152	499	503
19.8356	528	509
19.8561	470	495
19.8765	505	465
19.8969	522	477
19.9174	498	449
19.9378	509	483
19.9582	490	447
19.9787	462	484
19.9991	507	461
20.0195	493	537
20.04	449	476
20.0604	508	487
20.0808	469	464
20.1013	497	467
20.1217	475	498
20.1421	469	465
20.1625	496	532
20.183	476	473
20.2034	511	491
20.2238	461	494
20.2443	443	472
20.2647	466	503
20.2851	450	470
20.3056	498	463
20.326	468	459
20.3464	482	479
20.3669	511	458
20.3873	430	505
20.4077	465	448
20.4282	459	511
20.4486	469	446
20.469	445	456
20.4894	451	420
20.5099	446	445
20.5303	488	460
20.5507	442	462
20.5712	462	423
20.5916	465	407
20.612	484	426
20.6325	459	476
20.6529	446	449
20.6733	436	451
20.6938	435	455
20.7142	459	415
20.7346	432	430
20.7551	444	417
20.7755	447	453
20.7959	446	453
20.8164	427	440
20.8368	490	414
20.8572	447	406
20.8776	419	404
20.8981	415	461
20.9185	461	445
20.9389	455	424
20.9594	423	415
20.9798	414	446
21.0002	444	430
21.0207	436	400
21.0411	454	395
21.0615	450	441
21.082	417	421
21.1024	438	460
21.1228	452	406
21.1433	417	400
21.1637	473	435
21.1841	448	465
21.2045	424	381
21.225	447	379
21.2454	472	430
21.2658	439	432
21.2863	440	428
21.3067	416	453
21.3271	409	458
21.3476	458	423
21.368	453	468
21.3884	473	465
21.4089	458	423
21.4293	394	393
21.4497	417	418
21.4702	444	428
21.4906	422	386
21.511	422	433
21.5315	425	426
21.5519	384	460
21.5723	419	449
21.5927	402	430
21.6132	444	430
21.6336	413	411
21.654	422	446
21.6745	438	431
21.6949	424	423
21.7153	423	423
21.7358	403	437
21.7562	435	436
21.7766	431	419
21.7971	448	407
21.8175	433	424
21.8379	432	439
21.8584	379	405
21.8788	420	422
21.8992	427	436
21.9197	481	414
21.9401	398	431
21.9605	441	426
21.9809	440	454
22.0014	434	426
22.0218	403	421
22.0422	459	433
22.0627	432	460
22.0831	465	430
22.1035	452	430
22.124	443	424
22.1444	454	442
22.1648	453	467
22.1853	459	458
22.2057	455	457
22.2261	493	403
22.2466	483	449
22.267	487	474
22.2874	458	452
22.3078	453	457
22.3283	474	487
22.3487	509	450
22.3691	492	468
22.3896	471	471
22.41	480	480
22.4304	493	485
22.4509	513	511
22.4713	465	497
22.4917	478	464
22.5122	508	517
22.5326	513	448
22.553	472	487
22.5735	522	472
22.5939	480	486
22.6143	543	517
22.6348	536	496
22.6552	542	498
22.6756	480	502
22.696	519	498
22.7165	523	508
22.7369	532	508
22.7573	547	486
22.7778	545	517
22.7982	533	547
22.8186	554	530
22.8391	567	531
22.8595	560	534
22.8799	551	510
22.9004	583	551
22.9208	586	551
22.9412	582	550
22.9617	600	584
22.9821	559	561
23.0025	554	569
23.023	572	516
23.0434	559	555
23.0638	550	583
23.0842	557	542
23.1047	579	565
23.1251	572	530
23.1455	579	573
23.166	599	581
23.1864	555	544
23.2068	569	512
23.2273	527	521
23.2477	527	545
23.2681	545	542
23.2886	607	534
23.309	556	529
23.3294	496	516
23.3499	547	570
23.3703	605	564
23.3907	520	491
23.4111	511	549
23.4316	514	541
23.452	519	516
23.4724	531	464
23.4929	500	537
23.5133	524	514
23.5337	525	522
23.5542	505	501
23.5746	536	497
23.595	510	472
23.6155	516	468
23.6359	481	481
23.6563	515	487
23.6768	518	478
23.6972	476	499
23.7176	500	502
23.7381	518	498
23.7585	484	488
23.7789	496	490
23.7993	502	473
23.8198	465	489
23.8402	472	453
23.8606	472	424
23.8811	466	441
23.9015	477	488
23.9219	466	457
23.9424	473	458
23.9628	471	449
23.9832	461	427
24.0037	486	425
24.0241	478	469
24.0445	511	450
24.065	453	428
24.0854	444	446
24.1058	449	429
24.1263	417	460
24.1467	467	447
24.1671	430	453
24.1875	465	460
24.208	468	442
24.2284	413	405
24.2488	449	440
24.2693	464	404
24.2897	429	427
24.3101	441	393
24.3306	449	411
24.351	402	396
24.3714	428	422
24.3919	406	458
24.4123	422	434
24.4327	392	432
24.4532	446	398
24.4736	403	376
24.494	453	467
24.5144	420	410
24.5349	397	392
24.5553	427	427
24.5757	441	381
24.5962	411	383
24.6166	388	358
24.637	421	369
24.6575	391	382
24.6779	410	371
24.6983	416	396
24.7188	390	397
24.7392	392	401
24.7596	403	404
24.7801	386	381
24.8005	378	371
24.8209	375	352
24.8414	389	404
24.8618	396	369
24.8822	421	379
24.9026	357	379
24.9231	380	359
24.9435	361	363
24.9639	410	374
24.9844	341	385
25.0048	365	375
25.0252	361	415
25.0457	394	370
25.0661	360	361
25.0865	364	359
25.107	332	376
25.1274	371	368
25.1478	357	351
25.1683	356	375
25.1887	367	353
25.2091	361	328
25.2296	331	346
25.25	343	368
25.2704	362	357
25.2908	379	390
25.3113	372	332
25.3317	350	365
25.3521	338	341
25.3726	365	344
25.393	353	330
25.4134	367	328
25.4339	366	348
25.4543	344	346
25.4747	352	335
25.4952	327	346
25.5156	358	329
25.536	358	327
25.5565	315	347
25.5769	346	325
25.5973	358	336
25.6177	354	348
25.6382	347	344
25.6586	331	315
25.679	311	319
25.6995	351	341
25.7199	346	324
25.7403	313	309
25.7608	356	359
25.7812	348	320
25.8016	344	327
25.8221	372	351
25.8425	338	353
25.8629	335	335
25.8834	347	325
25.9038	363	328
25.9242	342	316
25.9447	370	352
25.9651	331	311
25.9855	344	363
26.0059	348	321
26.0264	342	347
26.0468	293	356
26.0672	342	337
26.0877	325	357
26.1081	366	326
26.1285	315	355
26.149	301	324
26.1694	360	372
26.1898	360	335
26.2103	362	322
26.2307	329	310
26.2511	364	365
26.2716	324	320
26.292	369	319
26.3124	325	335
26.3329	374	356
26.3533	331	341
26.3737	324	351
26.3941	323	323
26.4146	319	327
26.435	332	336
26.4554	335	361
26.4759	328	376
26.4963	335	309
26.5167	355	356
26.5372	340	330
26.5576	304	369
26.578	323	332
26.5985	363	340
26.6189	392	349
26.6393	304	342
26.6598	346	315
26.6802	350	362
26.7006	311	320
26.721	327	333
26.7415	338	339
26.7619	325	334
26.7823	352	323
26.8028	313	337
26.8232	328	334
26.8436	320	295
26.8641	313	341
26.8845	320	297
26.9049	286	292
26.9254	302	320
26.9458	356	292
26.9662	335	303
26.9867	315	307
27.0071	334	301
27.0275	347	306
27.048	342	315
27.0684	310	299
27.0888	330	315
27.1092	313	327
27.1297	312	293
27.1501	306	334
27.1705	304	284
27.191	310	304
27.2114	303	295
27.2318	328	295
27.2523	309	291
27.2727	321	307
27.2931	294	286
27.3136	310	330
27.334	295	277
27.3544	317	316
27.3749	336	275
27.3953	306	293
27.4157	279	292
27.4362	320	317
27.4566	314	283
27.477	297	288
27.4974	314	287
27.5179	293	298
27.5383	353	302
27.5587	287	305
27.5792	327	311
27.5996	308	327
27.62	270	310
27.6405	309	334
27.6609	315	314
27.6813	310	304
27.7018	301	264
27.7222	286	309
27.7426	287	256
27.7631	291	324
27.7835	280	287
27.8039	299	302
27.8243	304	305
27.8448	285	289
27.8652	305	318
27.8856	283	285
27.9061	311	279
27.9265	313	276
27.9469	279	291
27.9674	297	293
27.9878	276	295
28.0082	296	332
28.0287	277	288
28.0491	324	305
28.0695	320	296
28.09	308	315
28.1104	318	305
28.1308	305	304
28.1513	281	313
28.1717	318	268
28.1921	327	278
28.2125	265	317
28.233	294	278
28.2534	307	298
28.2738	322	292
28.2943	296	289
28.3147	261	298
28.3351	259	298
28.3556	267	308
28.376	276	312
28.3964	310	295
28.4169	327	299
28.4373	291	309
28.4577	275	281
28.4782	321	299
28.4986	309	311
28.519	325	324
28.5395	308	289
28.5599	287	292
28.5803	273	284
28.6007	322	301
28.6212	302	282
28.6416	293	315
28.662	310	286
28.6825	314	316
28.7029	298	280
28.7233	320	314
28.7438	274	281
28.7642	316	302
28.7846	310	304
28.8051	323	289
28.8255	275	291
28.8459	302	303
28.8664	253	279
28.8868	306	302
28.9072	302	310
28.9276	310	316
28.9481	267	295
28.9685	306	305
28.9889	307	295
29.0094	337	293
29.0298	280	330
29.0502	301	299
29.0707	308	309
29.0911	309	301
29.1115	264	281
29.132	275	306
29.1524	285	305
29.1728	304	325
29.1933	307	261
29.2137	308	274
29.2341	290	299
29.2546	322	300
29.275	286	244
29.2954	283	270
29.3158	253	313
29.3363	282	248
29.3567	261	286
29.3771	288	317
29.3976	329	302
29.418	321	302
29.4384	286	275
29.4589	319	277
29.4793	297	305
29.4997	286	282
29.5202	278	315
29.5406	297	307
29.561	309	294
29.5815	282	283
29.6019	290	306
29.6223	299	321
29.6428	276	321
29.6632	317	282
29.6836	296	296
29.704	296	304
29.7245	287	302
29.7449	275	307
29.7653	309	302
29.7858	290	291
29.8062	288	285
29.8266	265	320
29.8471	291	319
29.8675	331	302
29.8879	322	331
29.9084	279	288
29.9288	303	280
29.9492	289	311
29.9697	285	299
29.9901	304	330
30.0105	275	303
30.0309	321	289
30.0514	290	328
30.0718	283	305
30.0922	299	311
30.1127	300	337
30.1331	284	267
30.1535	277	314
30.174	329	300
30.1944	298	307
30.2148	325	317
30.2353	257	294
30.2557	315	340
30.2761	319	317
30.2966	290	301
30.317	294	304
30.3374	333	323
30.3579	290	323
30.3783	308	313
30.3987	327	350
30.4191	312	299
30.4396	288	303
30.46	303	338
30.4804	295	324
30.5009	287	290
30.5213	300	324
30.5417	305	314
30.5622	321	270
30.5826	286	323
30.603	291	288
30.6235	271	299
30.6439	312	307
30.6643	297	342
30.6848	311	321
30.7052	315	309
30.7256	306	304
30.7461	302	265
30.7665	297	278
30.7869	287	304
30.8073	297	317
30.8278	298	301
30.8482	313	283
30.8686	315	271
30.8891	310	282
30.9095	310	263
30.9299	307	306
30.9504	302	297
30.9708	277	280
30.9912	280	290
31.0117	317	311
31.0321	310	301
31.0525	273	289
31.073	305	295
31.0934	318	262
31.1138	304	301
31.1342	312	323
31.1547	293	283
31.1751	303	306
31.1955	320	258
31.216	282	301
31.2364	327	303
31.2568	301	280
31.2773	286	304
31.2977	310	315
31.3181	294	294
31.3386	300	294
31.359	319	302
31.3794	284	271
31.3999	302	283
31.4203	283	278
31.4407	269	289
31.4612	301	306
31.4816	305	274
31.502	283	294
31.5224	299	284
31.5429	262	309
31.5633	293	306
31.5837	299	287
31.6042	283	264
31.6246	263	280
31.645	284	299
31.6655	310	301
31.6859	302	282
31.7063	277	288
31.7268	289	286
31.7472	237	299
31.7676	290	302
31.7881	276	268
31.8085	295	291
31.8289	277	305
31.8494	266	271
31.8698	290	285
31.8902	282	261
31.9106	250	251
31.9311	288	308
31.9515	290	251
31.9719	322	280
31.9924	302	286
32.0128	303	269
32.0332	256	259
32.0537	288	300
32.0741	273	251
32.0945	290	288
32.115	299	262
32.1354	284	279
32.1558	276	280
32.1763	307	263
32.1967	295	288
32.2171	273	295
32.2375	285	298
32.258	288	270
32.2784	272	313
32.2988	278	300
32.3193	270	259
32.3397	281	261
32.3601	308	296
32.3806	290	280
32.401	307	282
32.4214	306	305
32.4419	306	278
32.4623	311	247
32.4827	308	295
32.5032	242	307
32.5236	317	269
32.544	276	284
32.5645	281	283
32.5849	249	289
32.6053	291	272
32.6257	281	257
32.6462	273	312
32.6666	294	279
32.687	289	267
32.7075	288	279
32.7279	272	264
32.7483	259	316
32.7688	299	248
32.7892	284	314
32.8096	290	269
32.8301	305	309
32.8505	303	292
32.8709	277	287
32.8914	277	287
32.9118	276	287
32.9322	313	276
32.9527	250	310
32.9731	290	286
32.9935	260	274
33.0139	278	255
33.0344	280	275
33.0548	276	275
33.0752	318	267
33.0957	305	287
33.1161	297	268
33.1365	246	281
33.157	302	275
33.1774	255	286
33.1978	298	294
33.2183	303	319
33.2387	297	293
33.2591	250	272
33.2796	271	288
33.3	255	269
33.3204	280	287
33.3408	299	289
33.3613	297	278
33.3817	278	248
33.4021	279	271
33.4226	303	258
33.443	295	286
33.4634	275	277
33.4839	300	267
33.5043	278	279
33.5247	285	291
33.5452	286	293
33.5656	273	273
33.586	275	274
33.6065	280	307
33.6269	256	279
33.6473	248	271
33.6678	256	257
33.6882	297	282
33.7086	263	273
33.729	294	274
33.7495	272	305
33.7699	260	292
33.7903	285	290
33.8108	286	249
33.8312	271	275
33.8516	286	285
33.8721	270	254
33.8925	315	282
33.9129	281	276
33.9334	252	255
33.9538	272	274
33.9742	284	270
33.9947	303	278
34.0151	250	316
34.0355	271	276
34.056	269	243
34.0764	247	268
34.0968	299	259
34.1172	263	256
34.1377	258	267
34.1581	297	283
34.1785	285	292
34.199	279	302
34.2194	262	271
34.2398	311	291
34.2603	252	280
34.2807	278	248
34.3011	264	254
34.3216	231	268
34.342	253	292
34.3624	277	264
34.3829	268	248
34.4033	273	265
34.4237	229	248
34.4441	278	283
34.4646	254	262
34.485	282	260
34.5054	259	266
34.5259	247	287
34.5463	310	267
34.5667	270	287
34.5872	253	267
34.6076	257	253
34.628	256	258
34.6485	243	265
34.6689	279	263
34.6893	236	254
34.7098	264	241
34.7302	258	243
34.7506	249	263
34.7711	285	281
34.7915	244	258
34.8119	292	238
34.8323	269	279
34.8528	261	252
34.8732	235	242
34.8936	279	307
34.9141	258	255
34.9345	244	267
34.9549	199	236
34.9754	247	240
34.9958	250	246
35.0162	249	250
35.0367	250	251
35.0571	267	262
35.0775	241	257
35.098	258	244
35.1184	288	208
35.1388	263	277
35.1593	258	254
35.1797	258	251
35.2001	249	232
35.2205	236	231
35.241	246	253
35.2614	239	244
35.2818	247	265
35.3023	242	267
35.3227	224	239
35.3431	252	259
35.3636	242	247
35.384	243	258
35.4044	254	234
35.4249	234	259
35.4453	211	253
35.4657	231	231
35.4862	251	219
35.5066	255	288
35.527	246	225
35.5474	239	243
35.5679	241	237
35.5883	238	251
35.6087	243	250
35.6292	236	265
35.6496	222	257
35.67	245	248
35.6905	225	252
35.7109	229	235
35.7313	225	234
35.7518	229	235
35.7722	241	267
35.7926	228	257
35.8131	238	253
35.8335	241	227
35.8539	241	235
35.8744	271	254
35.8948	239	218
35.9152	226	220
35.9356	239	246
35.9561	245	257
35.9765	236	229
35.9969	231	266
36.0174	254	234
36.0378	236	224
36.0582	248	236
36.0787	225	257
36.0991	262	250
36.1195	271	240
36.14	246	235
36.1604	234	231
36.1808	218	235
36.2013	226	217
36.2217	254	259
36.2421	222	248
36.2626	231	256
36.283	256	224
36.3034	261	258
36.3238	251	221
36.3443	237	226
36.3647	255	240
36.3851	238	235
36.4056	199	206
36.426	223	220
36.4464	244	244
36.4669	236	223
36.4873	223	228
36.5077	223	220
36.5282	219	278
36.5486	202	189
36.569	247	232
36.5895	235	231
36.6099	232	226
36.6303	243	216
36.6507	248	232
36.6712	228	209
36.6916	241	226
36.712	225	228
36.7325	232	228
36.7529	253	235
36.7733	232	212
36.7938	235	255
36.8142	233	260
36.8346	213	236
36.8551	249	245
36.8755	221	225
36.8959	233	222
36.9164	219	226
36.9368	237	239
36.9572	240	239
36.9777	230	243
36.9981	209	210
37.0185	254	236
37.0389	227	239
37.0594	227	223
37.0798	228	255
37.1002	239	224
37.1207	208	242
37.1411	245	224
37.1615	235	233
37.182	242	240
37.2024	226	249
37.2228	207	206
37.2433	244	231
37.2637	224	221
37.2841	216	197
37.3046	215	212
37.325	243	225
37.3454	240	235
37.3659	239	225
37.3863	218	218
37.4067	235	212
37.4271	233	268
37.4476	224	245
37.468	247	226
37.4884	230	221
37.5089	204	222
37.5293	209	204
37.5497	223	257
37.5702	233	224
37.5906	209	208
37.611	214	235
37.6315	236	206
37.6519	243	208
37.6723	218	237
37.6928	238	278
37.7132	207	233
37.7336	222	238
37.754	213	224
37.7745	224	210
37.7949	231	213
37.8153	224	215
37.8358	225	241
37.8562	230	230
37.8766	232	229
37.8971	202	233
37.9175	212	208
37.9379	242	196
37.9584	232	232
37.9788	226	218
37.9992	214	246
38.0197	211	246
38.0401	229	223
38.0605	238	238
38.081	210	228
38.1014	230	224
38.1218	216	234
38.1422	234	189
38.1627	207	259
38.1831	251	197
38.2035	233	238
38.224	218	243
38.2444	232	203
38.2648	231	199
38.2853	226	228
38.3057	245	207
38.3261	244	210
38.3466	223	236
38.367	206	209
38.3874	228	187
38.4079	188	231
38.4283	228	253
38.4487	208	219
38.4692	245	224
38.4896	225	224
38.51	228	223
38.5304	209	238
38.5509	220	227
38.5713	247	213
38.5917	241	211
38.6122	233	201
38.6326	228	236
38.653	195	212
38.6735	261	235
38.6939	237	204
38.7143	229	230
38.7348	220	205
38.7552	239	202
38.7756	207	227
38.7961	212	199
38.8165	218	210
38.8369	208	196
38.8573	217	216
38.8778	199	210
38.8982	223	230
38.9186	206	222
38.9391	218	202
38.9595	218	216
38.9799	196	215
39.0004	206	201
39.0208	216	195
39.0412	222	233
39.0617	207	214
39.0821	195	220
39.1025	213	253
39.123	207	216
39.1434	205	207
39.1638	227	214
39.1843	239	203
39.2047	216	199
39.2251	187	197
39.2455	216	216
39.266	206	210
39.2864	220	201
39.3068	211	231
39.3273	195	217
39.3477	205	220
39.3681	219	192
39.3886	223	225
39.409	194	217
39.4294	194	223
39.4499	214	198
39.4703	210	198
39.4907	204	234
39.5112	235	234
39.5316	192	197
39.552	193	200
39.5725	206	195
39.5929	208	211
39.6133	190	187
39.6337	191	208
39.6542	206	179
39.6746	191	227
39.695	194	171
39.7155	205	225
39.7359	190	196
39.7563	224	219
39.7768	182	211
39.7972	220	199
39.8176	180	202
39.8381	198	201
39.8585	215	190
39.8789	214	201
39.8994	190	203
39.9198	185	181
39.9402	205	194
39.9606	189	200
39.9811	180	213
40.0015	195	195

## Sheet: ATR-FTIR spectra
Wavenumber (cm-1)	NTT	LTT
798.387	-0.01859	-0.01829
800.316	-0.01901	-0.01894
802.244	-0.02008	-0.02061
804.172	-0.02135	-0.02266
806.101	-0.0223	-0.02432
808.029	-0.02263	-0.02505
809.958	-0.02232	-0.02474
811.886	-0.02165	-0.02368
813.815	-0.02095	-0.02241
815.743	-0.02049	-0.02142
817.672	-0.02033	-0.02096
819.6	-0.02033	-0.02095
821.529	-0.02031	-0.02114
823.457	-0.02012	-0.02122
825.386	-0.01969	-0.02093
827.314	-0.01895	-0.02016
829.243	-0.01777	-0.01881
831.171	-0.01585	-0.01674
833.1	-0.01293	-0.01381
835.028	-0.00891	-0.01001
836.957	-0.00414	-0.00558
838.885	0.000575	-0.00119
840.813	0.00414	0.00226
842.742	0.00562	0.00391
844.67	0.00479	0.00343
846.599	0.00244	0.00143
848.527	0.000335	-0.000543
850.456	0.000673	-0.000434
852.384	0.00523	0.00351
854.313	0.01449	0.01188
856.241	0.02719	0.0236
858.17	0.04052	0.03604
860.098	0.05094	0.04577
862.027	0.05531	0.04974
863.955	0.05202	0.04635
865.884	0.04143	0.036
867.812	0.02574	0.02086
869.741	0.00811	0.00409
871.669	-0.00829	-0.01126
873.597	-0.02119	-0.02307
875.526	-0.02957	-0.03056
877.454	-0.03354	-0.03403
879.383	-0.0339	-0.03435
881.311	-0.03168	-0.03249
883.24	-0.02778	-0.02918
885.168	-0.02292	-0.02489
887.097	-0.01767	-0.02004
889.025	-0.01253	-0.01504
890.954	-0.00793	-0.01039
892.882	-0.0042	-0.00655
894.811	-0.0015	-0.00381
896.739	9.3e-05	-0.0023
898.668	0.000541	-0.002
900.596	-0.000178	-0.00285
902.525	-0.00199	-0.00469
904.453	-0.00455	-0.00715
906.381	-0.00707	-0.00954
908.31	-0.00833	-0.01076
910.238	-0.00696	-0.00954
912.167	-0.00187	-0.00489
914.095	0.00716	0.00348
916.024	0.01931	0.01485
917.952	0.03276	0.02756
919.881	0.0453	0.0395
921.809	0.05502	0.04882
923.738	0.06095	0.05456
925.666	0.06334	0.05694
927.595	0.06337	0.05706
929.523	0.06251	0.05634
931.452	0.06169	0.05569
933.38	0.06083	0.05505
935.309	0.05878	0.05331
937.237	0.05391	0.0489
939.165	0.04495	0.04056
941.094	0.03177	0.02817
943.022	0.01578	0.01302
944.951	-0.000468	-0.00251
946.879	-0.01409	-0.01568
948.808	-0.02295	-0.02447
950.736	-0.02636	-0.0282
952.665	-0.02526	-0.02764
954.593	-0.02162	-0.02457
956.522	-0.01752	-0.02088
958.45	-0.01434	-0.01784
960.379	-0.01242	-0.01583
962.307	-0.01131	-0.01452
964.236	-0.01042	-0.01345
966.164	-0.00963	-0.01253
968.093	-0.00945	-0.01219
970.021	-0.01061	-0.013
971.949	-0.01332	-0.01505
973.878	-0.01649	-0.01727
975.806	-0.01747	-0.01722
977.735	-0.01231	-0.01132
979.663	0.00331	0.00436
981.592	0.03296	0.03308
983.52	0.07827	0.07642
985.449	0.13826	0.13358
987.377	0.20893	0.20095
989.306	0.2836	0.27239
991.234	0.35381	0.33992
993.163	0.41084	0.39519
995.091	0.44768	0.43133
997.02	0.46109	0.44499
998.948	0.45296	0.43769
1000.88	0.43045	0.41607
1002.81	0.40442	0.39046
1004.73	0.38641	0.37204
1006.66	0.38504	0.36935
1008.59	0.40305	0.38549
1010.52	0.43623	0.41688
1012.45	0.47469	0.45433
1014.38	0.5061	0.48607
1016.3	0.51959	0.50142
1018.23	0.50894	0.49393
1020.16	0.47395	0.46279
1022.09	0.41968	0.41235
1024.02	0.35441	0.35026
1025.95	0.28725	0.28525
1027.88	0.22643	0.22542
1029.8	0.1785	0.17746
1031.73	0.14808	0.14621
1033.66	0.13756	0.1343
1035.59	0.14638	0.14142
1037.52	0.17038	0.16368
1039.45	0.2019	0.19369
1041.37	0.23135	0.22205
1043.3	0.25003	0.24019
1045.23	0.25318	0.24333
1047.16	0.24154	0.23202
1049.09	0.22032	0.21135
1051.02	0.1959	0.1876
1052.95	0.1717	0.1643
1054.87	0.14586	0.1398
1056.8	0.1124	0.10823
1058.73	0.06569	0.06387
1060.66	0.00619	0.00667
1062.59	-0.05604	-0.05402
1064.52	-0.10255	-0.10045
1066.44	-0.11293	-0.11255
1068.37	-0.07382	-0.07665
1070.3	0.01361	0.00693
1072.23	0.13161	0.12163
1074.16	0.25073	0.23901
1076.09	0.33985	0.3284
1078.02	0.37702	0.3676
1079.94	0.35657	0.35009
1081.87	0.28961	0.28596
1083.8	0.19843	0.19677
1085.73	0.10769	0.10694
1087.66	0.03651	0.03586
1089.59	-0.00573	-0.00656
1091.51	-0.01901	-0.01987
1093.44	-0.00936	-0.00997
1095.37	0.01504	0.01475
1097.3	0.0464	0.04616
1099.23	0.07805	0.07735
1101.16	0.10417	0.10258
1103.09	0.11976	0.11719
1105.01	0.12146	0.11828
1106.94	0.109	0.10591
1108.87	0.08605	0.08378
1110.8	0.0597	0.05867
1112.73	0.03826	0.03843
1114.66	0.02821	0.02909
1116.58	0.03175	0.03264
1118.51	0.04596	0.04626
1120.44	0.06409	0.0635
1122.37	0.07815	0.07675
1124.3	0.08185	0.08008
1126.23	0.07278	0.07117
1128.16	0.05291	0.05198
1130.08	0.0279	0.02791
1132.01	0.00522	0.00615
1133.94	-0.00786	-0.00632
1135.87	-0.00606	-0.00449
1137.8	0.0127	0.01363
1139.73	0.04696	0.0466
1141.65	0.09206	0.08997
1143.58	0.14121	0.13728
1145.51	0.18693	0.1814
1147.44	0.22249	0.21591
1149.37	0.24316	0.23624
1151.3	0.24675	0.24018
1153.23	0.2337	0.22795
1155.15	0.20658	0.20185
1157.08	0.16939	0.16562
1159.01	0.12685	0.12381
1160.94	0.08371	0.08111
1162.87	0.04417	0.04179
1164.8	0.01137	0.00914
1166.73	-0.01291	-0.01498
1168.65	-0.02845	-0.03026
1170.58	-0.03634	-0.03779
1172.51	-0.03858	-0.03962
1174.44	-0.03748	-0.03811
1176.37	-0.03508	-0.03538
1178.3	-0.03285	-0.03293
1180.22	-0.03147	-0.03149
1182.15	-0.03102	-0.03112
1184.08	-0.03109	-0.0314
1186.01	-0.03098	-0.0316
1187.94	-0.02993	-0.03094
1189.87	-0.02731	-0.02874
1191.8	-0.02284	-0.02471
1193.72	-0.01676	-0.01908
1195.65	-0.00988	-0.01262
1197.58	-0.00336	-0.00647
1199.51	0.0016	-0.00179
1201.44	0.00422	0.000694

## Sheet: NMR spectra with substraction
Chemical shift (ppm)	NTT①	LTT①		Chemical shift (ppm)	Amorphous starch②	Amorphous zoom for NTT③	Amorphous zoom for LTT③	Substraction for NTT④	Substraction for LTT④
50.022	-1444830	-3078020		50.0062	3547565	1.29106e+06	2.10702e+06	-2.73589e+06	-5.18504e+06
50.0684	-1448680	-2868310		50.0556	4072384	1.48206e+06	2.41873e+06	-2.93074e+06	-5.28704e+06
50.1148	-1443600	-2540340		50.1051	4630331	1.68511e+06	2.75011e+06	-3.12871e+06	-5.29045e+06
50.1613	-1436040	-2119130		50.1545	5185604	1.88719e+06	3.07991e+06	-3.32323e+06	-5.19904e+06
50.2077	-1430870	-1640110		50.204	5702646	2.07535e+06	3.387e+06	-3.50622e+06	-5.02711e+06
50.2541	-1430450	-1145310		50.2534	6149123	2.23784e+06	3.65218e+06	-3.66829e+06	-4.79749e+06
50.3005	-1434100	-678581		50.3029	6498616	2.36503e+06	3.85975e+06	-3.79913e+06	-4.53833e+06
50.347	-1438210	-280621		50.3523	6732744	2.45024e+06	3.99881e+06	-3.88845e+06	-4.27943e+06
50.3934	-1436850	15721		50.4018	6842592	2.49021e+06	4.06405e+06	-3.92706e+06	-4.04833e+06
50.4398	-1422950	189144		50.4512	6829284	2.48537e+06	4.05615e+06	-3.90832e+06	-3.867e+06
50.4862	-1389620	232186		50.5007	6703663	2.43965e+06	3.98154e+06	-3.82927e+06	-3.74935e+06
50.5327	-1331660	151800		50.5502	6485162	2.36013e+06	3.85176e+06	-3.69179e+06	-3.69996e+06
50.5791	-1246820	-31827		50.5996	6199929	2.25633e+06	3.68235e+06	-3.50315e+06	-3.71418e+06
50.6255	-1136600	-288078		50.6491	5878442	2.13933e+06	3.49141e+06	-3.27593e+06	-3.77949e+06
50.7184	-866223	-868724		50.6985	5552798	2.02082e+06	3.298e+06	-2.88704e+06	-4.16672e+06
50.7648	-727485	-1118920		50.748	5253968	1.91207e+06	3.12051e+06	-2.63955e+06	-4.23943e+06
50.8112	-603814	-1302490		50.7974	5009235	1.823e+06	2.97516e+06	-2.42682e+06	-4.27765e+06
50.8576	-508174	-1402090		50.8469	4840071	1.76144e+06	2.87469e+06	-2.26961e+06	-4.27678e+06
50.9041	-451318	-1412910		50.8963	4760591	1.73251e+06	2.82748e+06	-2.18383e+06	-4.24039e+06
50.9505	-440244	-1342810		50.9458	4776760	1.7384e+06	2.83708e+06	-2.17864e+06	-4.17989e+06
50.9969	-477105	-1210830		50.9952	4886346	1.77828e+06	2.90217e+06	-2.25538e+06	-4.113e+06
51.0433	-558771	-1044360		51.0447	5079621	1.84862e+06	3.01696e+06	-2.40739e+06	-4.06132e+06
51.0898	-677088	-875237		51.0941	5340707	1.94363e+06	3.17203e+06	-2.62072e+06	-4.04727e+06
51.1362	-819830	-735443		51.1436	5649418	2.05598e+06	3.35538e+06	-2.87581e+06	-4.09083e+06
51.1826	-972202	-652823		51.193	5983395	2.17753e+06	3.55375e+06	-3.14973e+06	-4.20657e+06
51.229	-1118710	-647434		51.2425	6320326	2.30015e+06	3.75386e+06	-3.41886e+06	-4.40129e+06
51.2755	-1245080	-728946		51.2919	6640032	2.4165e+06	3.94374e+06	-3.66158e+06	-4.67269e+06
51.3219	-1340080	-895368		51.3414	6926225	2.52065e+06	4.11372e+06	-3.86073e+06	-5.00909e+06
51.3683	-1396770	-1133250		51.3908	7167784	2.60856e+06	4.25719e+06	-4.00533e+06	-5.39044e+06
51.4612	-1392860	-1722750		51.4403	7359449	2.67831e+06	4.37103e+06	-4.07117e+06	-6.09378e+06
51.5076	-1343070	-2009600		51.4897	7501897	2.73015e+06	4.45564e+06	-4.07322e+06	-6.46524e+06
51.554	-1274650	-2245750		51.5392	7601207	2.76629e+06	4.51462e+06	-4.04094e+06	-6.76037e+06
51.6004	-1199850	-2401060		51.5886	7667825	2.79054e+06	4.55419e+06	-3.99039e+06	-6.95525e+06
51.6469	-1130590	-2452570		51.6381	7715124	2.80775e+06	4.58228e+06	-3.93834e+06	-7.03485e+06
51.6933	-1076870	-2386860		51.6875	7757758	2.82327e+06	4.6076e+06	-3.90014e+06	-6.99446e+06
51.7397	-1045370	-2201360		51.737	7809953	2.84226e+06	4.6386e+06	-3.88763e+06	-6.83996e+06
51.7861	-1038740	-1904500		51.7864	7883947	2.86919e+06	4.68255e+06	-3.90793e+06	-6.58705e+06
51.8326	-1055390	-1514820		51.8359	7988702	2.90732e+06	4.74477e+06	-3.96271e+06	-6.25959e+06
51.879	-1089960	-1059080		51.8854	8129036	2.95839e+06	4.82812e+06	-4.04835e+06	-5.8872e+06
51.9254	-1134310	-569738		51.9348	8305219	3.0225e+06	4.93276e+06	-4.15681e+06	-5.50249e+06
51.9718	-1178850	-81978		51.9843	8513088	3.09815e+06	5.05622e+06	-4.277e+06	-5.1382e+06
52.0183	-1214060	369303		52.0337	8744620	3.18242e+06	5.19373e+06	-4.39648e+06	-4.82443e+06
52.0647	-1231830	752368		52.0832	8988898	3.27131e+06	5.33882e+06	-4.50314e+06	-4.58645e+06
52.1111	-1226590	1041060		52.1326	9233354	3.36028e+06	5.48401e+06	-4.58687e+06	-4.44295e+06
52.204	-1141020	1269150		52.1821	9465151	3.44464e+06	5.62168e+06	-4.58566e+06	-4.35253e+06
52.2504	-1065600	1197500		52.2315	9672540	3.52011e+06	5.74486e+06	-4.58571e+06	-4.54736e+06
52.2968	-975897	1009660		52.281	9846068	3.58326e+06	5.84792e+06	-4.55916e+06	-4.83826e+06
52.3432	-879151	721589		52.3304	9979517	3.63183e+06	5.92718e+06	-4.51098e+06	-5.20559e+06
52.3896	-782601	355965		52.3799	10070466	3.66493e+06	5.9812e+06	-4.44753e+06	-5.62523e+06
52.4361	-692424	-59625		52.4293	10120451	3.68312e+06	6.01089e+06	-4.37554e+06	-6.07051e+06
52.4825	-612958	-494740		52.4788	10134716	3.68831e+06	6.01936e+06	-4.30127e+06	-6.5141e+06
52.5289	-546309	-918308		52.5282	10121584	3.68353e+06	6.01156e+06	-4.22984e+06	-6.92987e+06
52.5753	-492370	-1300890		52.5777	10091550	3.6726e+06	5.99372e+06	-4.16497e+06	-7.29461e+06
52.6218	-449215	-1616830		52.6271	10056176	3.65973e+06	5.97271e+06	-4.10894e+06	-7.58954e+06
52.6682	-413790	-1846170		52.6766	10026927	3.64908e+06	5.95534e+06	-4.06287e+06	-7.80151e+06
52.7146	-382727	-1976200		52.726	10014053	3.6444e+06	5.94769e+06	-4.02712e+06	-7.92389e+06
52.761	-353152	-2002460		52.7755	10025657	3.64862e+06	5.95458e+06	-4.00177e+06	-7.95704e+06
52.8075	-323309	-1929190		52.8249	10067002	3.66367e+06	5.97914e+06	-3.98698e+06	-7.90833e+06
52.8539	-292896	-1769030		52.8744	10140148	3.69029e+06	6.02258e+06	-3.98318e+06	-7.79161e+06
52.9467	-236036	-1274060		52.9238	10243916	3.72805e+06	6.08422e+06	-3.96409e+06	-7.35828e+06
52.9932	-214559	-994414		52.9733	10374193	3.77546e+06	6.16159e+06	-3.99002e+06	-7.15601e+06
53.0396	-201091	-733250		53.0227	10524504	3.83017e+06	6.25087e+06	-4.03126e+06	-6.98412e+06
53.086	-197104	-518708		53.0722	10686788	3.88923e+06	6.34725e+06	-4.08633e+06	-6.86596e+06
53.1324	-202498	-374115		53.1216	10852301	3.94946e+06	6.44556e+06	-4.15196e+06	-6.81967e+06
53.1789	-215340	-315584		53.1711	11012519	4.00777e+06	6.54072e+06	-4.22311e+06	-6.8563e+06
53.2253	-231945	-350217		53.2206	11159966	4.06143e+06	6.62829e+06	-4.29337e+06	-6.97851e+06
53.2717	-247350	-475177		53.27	11288883	4.10834e+06	6.70486e+06	-4.35569e+06	-7.18003e+06
53.3181	-256081	-677747		53.3195	11395671	4.14721e+06	6.76828e+06	-4.40329e+06	-7.44603e+06
53.3646	-253120	-936418		53.3689	11479092	4.17757e+06	6.81783e+06	-4.43069e+06	-7.75425e+06
53.411	-234888	-1222960		53.4184	11540206	4.19981e+06	6.85413e+06	-4.4347e+06	-8.07709e+06
53.4574	-200065	-1505240		53.4678	11582095	4.21505e+06	6.87901e+06	-4.41512e+06	-8.38425e+06
53.5038	-150108	-1750580		53.5173	11609385	4.22498e+06	6.89522e+06	-4.37509e+06	-8.6458e+06
53.5503	-89322	-1929270		53.5667	11627685	4.23164e+06	6.90608e+06	-4.32097e+06	-8.83535e+06
53.5967	-24464	-2017780		53.6162	11642960	4.2372e+06	6.91516e+06	-4.26167e+06	-8.93294e+06
53.6895	83534	-1876650		53.6656	11660959	4.24375e+06	6.92585e+06	-4.16022e+06	-8.8025e+06
53.736	109950	-1650600		53.7151	11686724	4.25313e+06	6.94115e+06	-4.14318e+06	-8.59175e+06
53.7824	109597	-1341730		53.7645	11724245	4.26679e+06	6.96343e+06	-4.15719e+06	-8.30516e+06
53.8288	79949	-977502		53.814	11776288	4.28573e+06	6.99434e+06	-4.20578e+06	-7.97185e+06
53.8752	22273	-591813		53.8634	11844376	4.3105e+06	7.03478e+06	-4.28823e+06	-7.6266e+06
53.9217	-58318	-221523		53.9129	11928934	4.34128e+06	7.08501e+06	-4.3996e+06	-7.30653e+06
53.9681	-153416	97334		53.9623	12029521	4.37788e+06	7.14475e+06	-4.5313e+06	-7.04741e+06
54.0145	-252378	333326		54.0118	12145138	4.41996e+06	7.21342e+06	-4.67234e+06	-6.88009e+06
54.0609	-343779	462934		54.0612	12274522	4.46705e+06	7.29026e+06	-4.81083e+06	-6.82733e+06
54.1074	-417017	473088		54.1107	12416388	4.51868e+06	7.37452e+06	-4.93569e+06	-6.90143e+06
54.1538	-463862	362628		54.1601	12569584	4.57443e+06	7.46551e+06	-5.03829e+06	-7.10288e+06
54.2002	-479671	142550		54.2096	12733111	4.63394e+06	7.56263e+06	-5.11361e+06	-7.42008e+06
54.2466	-464109	-164977		54.259	12906028	4.69687e+06	7.66534e+06	-5.16098e+06	-7.83031e+06
54.2931	-421225	-528742		54.3085	13087236	4.76282e+06	7.77296e+06	-5.18404e+06	-8.3017e+06
54.3395	-358866	-911519		54.3579	13275194	4.83122e+06	7.8846e+06	-5.19009e+06	-8.79612e+06
54.4323	-218677	-1577130		54.4074	13467597	4.90124e+06	7.99887e+06	-5.11992e+06	-9.576e+06
54.4788	-163163	-1788880		54.4568	13661109	4.97167e+06	8.11381e+06	-5.13483e+06	-9.90269e+06
54.5252	-129353	-1884340		54.5063	13851161	5.04083e+06	8.22668e+06	-5.17018e+06	-1.0111e+07
54.5716	-121896	-1849690		54.5558	14031920	5.10661e+06	8.33404e+06	-5.22851e+06	-1.01837e+07
54.618	-140930	-1683120		54.6052	14196421	5.16648e+06	8.43175e+06	-5.30741e+06	-1.01149e+07
54.6645	-181999	-1395050		54.6547	14336913	5.21761e+06	8.51519e+06	-5.39961e+06	-9.91024e+06
54.7109	-236685	-1007130		54.7041	14445379	5.25708e+06	8.57961e+06	-5.49377e+06	-9.58674e+06
54.7573	-293869	-550134		54.7536	14514221	5.28214e+06	8.6205e+06	-5.57601e+06	-9.17063e+06
54.8037	-341427	-61087		54.803	14537034	5.29044e+06	8.63405e+06	-5.63187e+06	-8.69513e+06
54.8502	-368119	420246		54.8525	14509403	5.28038e+06	8.61764e+06	-5.6485e+06	-8.19739e+06
54.8966	-365379	855084		54.9019	14429625	5.25135e+06	8.57025e+06	-5.61673e+06	-7.71517e+06
54.943	-328730	1209240		54.9514	14299280	5.20391e+06	8.49284e+06	-5.53264e+06	-7.2836e+06
54.9894	-258597	1456290		55.0008	14123567	5.13997e+06	8.38847e+06	-5.39856e+06	-6.93218e+06
55.0359	-160406	1579960		55.0503	13911343	5.06273e+06	8.26243e+06	-5.22314e+06	-6.68247e+06
55.0823	-43922	1575580		55.0997	13674830	4.97666e+06	8.12195e+06	-5.02058e+06	-6.54637e+06
55.1751	191513	1222420		55.1492	13428995	4.88719e+06	7.97594e+06	-4.69568e+06	-6.75352e+06
55.2216	283111	919106		55.1986	13190638	4.80045e+06	7.83438e+06	-4.51734e+06	-6.91527e+06
55.268	342148	573820		55.2481	12977228	4.72278e+06	7.70762e+06	-4.38063e+06	-7.1338e+06
55.3144	362026	222720		55.2975	12805621	4.66033e+06	7.6057e+06	-4.2983e+06	-7.38298e+06
55.3608	341155	-99111		55.347	12690732	4.61852e+06	7.53746e+06	-4.27736e+06	-7.63658e+06
55.4073	283128	-361328		55.3964	12644311	4.60162e+06	7.50989e+06	-4.3185e+06	-7.87122e+06
55.4537	196144	-541501		55.4459	12673926	4.6124e+06	7.52748e+06	-4.41626e+06	-8.06898e+06
55.5001	91780	-627469		55.4953	12782263	4.65183e+06	7.59183e+06	-4.56005e+06	-8.2193e+06
55.5465	-16706	-618575		55.5448	12966813	4.71899e+06	7.70144e+06	-4.7357e+06	-8.32001e+06
55.593	-116263	-525637		55.5942	13220006	4.81114e+06	7.85182e+06	-4.9274e+06	-8.37746e+06
55.6394	-195843	-369624		55.6437	13529765	4.92387e+06	8.0358e+06	-5.11971e+06	-8.40542e+06
55.6858	-247835	-179138		55.6931	13880467	5.0515e+06	8.24409e+06	-5.29933e+06	-8.42323e+06
55.7322	-268943	13015		55.7426	14254238	5.18752e+06	8.46608e+06	-5.45646e+06	-8.45307e+06
55.7787	-260348	173842		55.7921	14632428	5.32516e+06	8.6907e+06	-5.5855e+06	-8.51686e+06
55.8251	-227207	274253		55.8415	14997196	5.4579e+06	8.90735e+06	-5.68511e+06	-8.6331e+06
55.9179	-120693	218620		55.891	15333009	5.58012e+06	9.1068e+06	-5.70081e+06	-8.88818e+06
55.9644	-65771	53055		55.9404	15627950	5.68745e+06	9.28198e+06	-5.75323e+06	-9.22892e+06
56.0108	-20034	-190028		55.9899	15874697	5.77725e+06	9.42853e+06	-5.79729e+06	-9.61856e+06
56.0572	12201	-485576		56.0393	16071080	5.84872e+06	9.54517e+06	-5.83652e+06	-1.00307e+07
56.1036	30163	-800048		56.0888	16220180	5.90298e+06	9.63373e+06	-5.87282e+06	-1.04338e+07
56.15	36577	-1095300		56.1382	16329932	5.94293e+06	9.69891e+06	-5.90635e+06	-1.07942e+07
56.1965	37009	-1333150		56.1877	16412289	5.9729e+06	9.74783e+06	-5.93589e+06	-1.1081e+07
56.2429	38723	-1480120		56.2371	16482020	5.99827e+06	9.78924e+06	-5.95955e+06	-1.12694e+07
56.2893	49256	-1511750		56.2866	16555236	6.02492e+06	9.83273e+06	-5.97566e+06	-1.13445e+07
56.3357	74979	-1415930		56.336	16647819	6.05861e+06	9.88772e+06	-5.98363e+06	-1.13036e+07
56.3822	119878	-1194850		56.3855	16773859	6.10448e+06	9.96257e+06	-5.98461e+06	-1.11574e+07
56.4286	184791	-865183		56.4349	16944283	6.16651e+06	1.00638e+07	-5.98171e+06	-1.0929e+07
56.475	267225	-456548		56.4844	17165776	6.24711e+06	1.01953e+07	-5.97989e+06	-1.06519e+07
56.5214	361798	-8271		56.5338	17440113	6.34695e+06	1.03583e+07	-5.98515e+06	-1.03666e+07
56.5679	461217	435087		56.5833	17763959	6.46481e+06	1.05506e+07	-6.00359e+06	-1.01155e+07
56.6607	644221	1134270		56.6327	18129154	6.59771e+06	1.07675e+07	-5.95349e+06	-9.63326e+06
56.7071	716382	1321930		56.6822	18523453	6.74121e+06	1.10017e+07	-6.02483e+06	-9.67979e+06
56.7536	772894	1376790		56.7316	18931649	6.88976e+06	1.12442e+07	-6.11687e+06	-9.86737e+06
56.8	816237	1299470		56.7811	19336988	7.03728e+06	1.14849e+07	-6.22104e+06	-1.01854e+07
56.8464	852339	1106450		56.8305	19722721	7.17766e+06	1.1714e+07	-6.32532e+06	-1.06076e+07
56.8928	889651	828230		56.88	20073667	7.30538e+06	1.19224e+07	-6.41573e+06	-1.10942e+07
56.9393	937690	505681		56.9294	20377631	7.416e+06	1.2103e+07	-6.47831e+06	-1.15973e+07
56.9857	1005280	185144		56.9789	20626560	7.50659e+06	1.22508e+07	-6.50131e+06	-1.20657e+07
57.0321	1098800	-87176		57.0283	20817321	7.57601e+06	1.23641e+07	-6.47721e+06	-1.24513e+07
57.0785	1220690	-270808		57.0778	20952049	7.62504e+06	1.24441e+07	-6.40435e+06	-1.2715e+07
57.125	1368570	-335898		57.1273	21038021	7.65633e+06	1.24952e+07	-6.28776e+06	-1.28311e+07
57.1714	1535090	-266761		57.1767	21087099	7.67419e+06	1.25244e+07	-6.1391e+06	-1.27911e+07
57.2178	1708550	-63677		57.2262	21114770	7.68426e+06	1.25408e+07	-5.97571e+06	-1.26045e+07
57.2642	1874430	257318		57.2756	21138894	7.69304e+06	1.25551e+07	-5.81861e+06	-1.22978e+07
57.3107	2017310	666588		57.3251	21178279	7.70738e+06	1.25785e+07	-5.69007e+06	-1.19119e+07
57.3571	2123260	1124710		57.3745	21251199	7.73391e+06	1.26218e+07	-5.61065e+06	-1.14971e+07
57.4499	2188760	2011300		57.424	21373992	7.7786e+06	1.26948e+07	-5.58984e+06	-1.06835e+07
57.4964	2145440	2358790		57.4734	21559865	7.84625e+06	1.28051e+07	-5.70081e+06	-1.04464e+07
57.5428	2060650	2603000		57.5229	21817992	7.94019e+06	1.29585e+07	-5.87954e+06	-1.03555e+07
57.5892	1948990	2730700		57.5723	22152982	8.0621e+06	1.31574e+07	-6.11311e+06	-1.04267e+07
57.6356	1829230	2743670		57.6218	22564745	8.21195e+06	1.3402e+07	-6.38272e+06	-1.06583e+07
57.6821	1721900	2658210		57.6712	23048754	8.3881e+06	1.36895e+07	-6.6662e+06	-1.10312e+07
57.7285	1646520	2502950		57.7207	23596653	8.58749e+06	1.40149e+07	-6.94097e+06	-1.15119e+07
57.7749	1618800	2315100		57.7701	24197156	8.80603e+06	1.43715e+07	-7.18723e+06	-1.20564e+07
57.8213	1648460	2135880		57.8196	24837152	9.03894e+06	1.47516e+07	-7.39048e+06	-1.26158e+07
57.8678	1737720	2005700		57.869	25502870	9.28122e+06	1.5147e+07	-7.5435e+06	-1.31413e+07
57.9142	1880950	1959510		57.9185	26181054	9.52803e+06	1.55498e+07	-7.64708e+06	-1.35903e+07
57.9606	2065420	2023120		57.9679	26860009	9.77512e+06	1.59531e+07	-7.7097e+06	-1.393e+07
58.007	2273120	2210830		58.0174	27530450	1.00191e+07	1.63513e+07	-7.74599e+06	-1.41405e+07
58.0535	2483420	2524490		58.0668	28186094	1.02577e+07	1.67407e+07	-7.7743e+06	-1.42162e+07
58.0999	2676110	2954150		58.1163	28823954	1.04899e+07	1.71195e+07	-7.81374e+06	-1.41654e+07
58.1463	2834540	3480090		58.1657	29444348	1.07156e+07	1.7488e+07	-7.88109e+06	-1.40079e+07
58.2392	3014440	4711690		58.2152	30050629	1.09363e+07	1.78481e+07	-7.92184e+06	-1.31364e+07
58.2856	3039320	5358590		58.2646	30648681	1.11539e+07	1.82033e+07	-8.1146e+06	-1.28447e+07
58.332	3036760	5991170		58.3141	31246257	1.13714e+07	1.85582e+07	-8.33464e+06	-1.25671e+07
58.3784	3026920	6590370		58.3635	31852225	1.15919e+07	1.89181e+07	-8.56501e+06	-1.23278e+07
58.4249	3033430	7144920		58.413	32475780	1.18189e+07	1.92885e+07	-8.78543e+06	-1.21436e+07
58.4713	3080200	7651700		58.4625	33125725	1.20554e+07	1.96745e+07	-8.97519e+06	-1.20228e+07
58.5177	3188070	8115090		58.5119	33809841	1.23044e+07	2.00808e+07	-9.11629e+06	-1.19657e+07
58.5641	3371910	8545540		58.5614	34534424	1.25681e+07	2.05112e+07	-9.19615e+06	-1.19656e+07
58.6106	3638570	8957570		58.6108	35303980	1.28481e+07	2.09683e+07	-9.20955e+06	-1.20107e+07
58.657	3985960	9367610		58.6603	36121122	1.31455e+07	2.14536e+07	-9.15954e+06	-1.2086e+07
58.7034	4403440	9791960		58.7097	36986621	1.34605e+07	2.19676e+07	-9.05704e+06	-1.21757e+07
58.7498	4873490	10245200		58.7592	37899609	1.37927e+07	2.25099e+07	-8.91925e+06	-1.22647e+07
58.7963	5374320	10739200		58.8086	38857896	1.41415e+07	2.3079e+07	-8.76717e+06	-1.23398e+07
58.8427	5883230	11282800		58.8581	39858344	1.45056e+07	2.36732e+07	-8.62235e+06	-1.23904e+07
58.8891	6380040	11881600		58.9075	40897284	1.48837e+07	2.42903e+07	-8.50364e+06	-1.24087e+07
58.982	7287160	13258400		58.957	41970911	1.52744e+07	2.4928e+07	-7.98724e+06	-1.16696e+07
59.0284	7693520	14040300		59.0064	43075642	1.56764e+07	2.55841e+07	-7.98293e+06	-1.15438e+07
59.0748	8080930	14887400		59.0559	44208409	1.60887e+07	2.62569e+07	-8.00776e+06	-1.13695e+07
59.1212	8468630	15802400		59.1053	45366866	1.65103e+07	2.6945e+07	-8.04166e+06	-1.11426e+07
59.1677	8880970	16789200		59.1548	46549536	1.69407e+07	2.76474e+07	-8.05973e+06	-1.08582e+07
59.2141	9344110	17851900		59.2042	47755843	1.73797e+07	2.83638e+07	-8.0356e+06	-1.05119e+07
59.2605	9882550	18994600		59.2537	48986109	1.78274e+07	2.90945e+07	-7.94488e+06	-1.00999e+07
59.3069	10515800	20220400		59.3031	50241475	1.82843e+07	2.98401e+07	-7.7685e+06	-9.61975e+06
59.3534	11255800	21531000		59.3526	51523772	1.8751e+07	3.06017e+07	-7.49516e+06	-9.07075e+06
59.3998	12105300	22925900		59.402	52835371	1.92283e+07	3.13808e+07	-7.12299e+06	-8.45485e+06
59.4462	13058100	24402500		59.4515	54178998	1.97173e+07	3.21788e+07	-6.65917e+06	-7.77628e+06
59.4926	14099400	25955900		59.5009	55557538	2.0219e+07	3.29975e+07	-6.11956e+06	-7.04164e+06
59.5391	15208600	27579600		59.5504	56973810	2.07344e+07	3.38387e+07	-5.52579e+06	-6.25912e+06
59.5855	16361700	29266500		59.5998	58430348	2.12645e+07	3.47038e+07	-4.90276e+06	-5.4373e+06
59.6319	17535500	31009300		59.6493	59929150	2.18099e+07	3.5594e+07	-4.27442e+06	-4.58469e+06
59.6783	18710100	32802100		59.6987	61471448	2.23712e+07	3.651e+07	-3.6611e+06	-3.70792e+06
59.7712	21015100	36522000		59.7482	63057456	2.29484e+07	3.7452e+07	-1.9333e+06	-930004
59.8176	22142700	38446600		59.7977	64686143	2.35411e+07	3.84193e+07	-1.39842e+06	27262.9
59.864	23264900	40415600		59.8471	66355042	2.41485e+07	3.94106e+07	-883582	1.00505e+06
59.9104	24398300	42431400		59.8966	68060090	2.4769e+07	4.04232e+07	-370697	2.00816e+06
59.9569	25562100	44495900		59.946	69795558	2.54006e+07	4.1454e+07	161517	3.0419e+06
60.0033	26775600	46609700		59.9955	71554055	2.60406e+07	4.24984e+07	735050	4.11127e+06
60.0497	28055000	48770900		60.0449	73326642	2.66856e+07	4.35512e+07	1.36936e+06	5.21967e+06
60.0961	29410000	50974700		60.0944	75103064	2.73321e+07	4.46063e+07	2.07786e+06	6.36839e+06
60.1426	30842700	53212300		60.1438	76872098	2.79759e+07	4.5657e+07	2.86676e+06	7.5553e+06
60.189	32345900	55471600		60.1933	78621994	2.86128e+07	4.66963e+07	3.73313e+06	8.77528e+06
60.2354	33904200	57737200		60.2427	80341020	2.92384e+07	4.77173e+07	4.66582e+06	1.00199e+07
60.2818	35494600	59991700		60.2922	82018027	2.98487e+07	4.87133e+07	5.64591e+06	1.12784e+07
60.3283	37089700	62216300		60.3416	83643053	3.04401e+07	4.96785e+07	6.64962e+06	1.25378e+07
60.3747	38659600	64392800		60.3911	85207849	3.10096e+07	5.06079e+07	7.65005e+06	1.37849e+07
60.4211	40175900	66504000		60.4405	86706345	3.15549e+07	5.14979e+07	8.621e+06	1.50061e+07
60.4675	41614200	68535500		60.49	88134949	3.20748e+07	5.23464e+07	9.53939e+06	1.61891e+07
60.514	42956300	70476100		60.5394	89492680	3.25689e+07	5.31528e+07	1.03874e+07	1.73233e+07
60.6068	45320000	74059700		60.5889	90781089	3.30378e+07	5.3918e+07	1.22822e+07	2.01417e+07
60.6532	46346300	75700400		60.6383	92003975	3.34829e+07	5.46443e+07	1.28634e+07	2.10561e+07
60.6997	47284400	77245600		60.6878	93166889	3.39061e+07	5.5335e+07	1.33783e+07	2.19106e+07
60.7461	48152700	78703400		60.7372	94276474	3.43099e+07	5.59941e+07	1.38428e+07	2.27093e+07
60.7925	48972300	80085500		60.7867	95339678	3.46968e+07	5.66255e+07	1.42755e+07	2.346e+07
60.8389	49765100	81406000		60.8361	96362908	3.50692e+07	5.72333e+07	1.46959e+07	2.41727e+07
60.8854	50551400	82681400		60.8856	97351203	3.54289e+07	5.78202e+07	1.51225e+07	2.48612e+07
60.9318	51348600	83930300		60.935	98307497	3.57769e+07	5.83882e+07	1.55717e+07	2.55421e+07
60.9782	52170100	85172300		60.9845	99232038	3.61134e+07	5.89373e+07	1.60567e+07	2.6235e+07
61.0246	53025200	86428200		61.0339	100122030	3.64372e+07	5.94659e+07	1.6588e+07	2.69623e+07
61.0711	53918900	87718600		61.0834	100971558	3.67464e+07	5.99705e+07	1.71725e+07	2.77481e+07
61.1175	54852900	89063100		61.1329	101771773	3.70376e+07	6.04458e+07	1.78153e+07	2.86173e+07
61.1639	55826600	90479800		61.1823	102511369	3.73068e+07	6.0885e+07	1.85198e+07	2.95948e+07
61.2103	56838100	91983400		61.2318	103177312	3.75492e+07	6.12806e+07	1.92889e+07	3.07028e+07
61.2568	57885200	93585000		61.2812	103755751	3.77597e+07	6.16241e+07	2.01255e+07	3.19609e+07
61.3032	58966400	95290900		61.3307	104233049	3.79334e+07	6.19076e+07	2.1033e+07	3.33833e+07
61.396	61231200	99016800		61.3801	104596847	3.80658e+07	6.21237e+07	2.31654e+07	3.68931e+07
61.4425	62418400	101026000		61.4296	104837056	3.81532e+07	6.22664e+07	2.42652e+07	3.87596e+07
61.4889	63646700	103118000		61.479	104946695	3.81931e+07	6.23315e+07	2.54536e+07	4.07865e+07
61.5353	64920400	105282000		61.5285	104922509	3.81843e+07	6.23171e+07	2.67361e+07	4.29649e+07
61.5817	66243600	107504000		61.5779	104765291	3.81271e+07	6.22237e+07	2.81165e+07	4.52803e+07
61.6282	67619800	109773000		61.6274	104479879	3.80232e+07	6.20542e+07	2.95966e+07	4.77188e+07
61.6746	69050900	112077000		61.6768	104074842	3.78758e+07	6.18136e+07	3.11751e+07	5.02634e+07
61.721	70536500	114411000		61.7263	103561865	3.76891e+07	6.1509e+07	3.28474e+07	5.2902e+07
61.7674	72073300	116766000		61.7757	102954884	3.74682e+07	6.11485e+07	3.46051e+07	5.56175e+07
61.8139	73653900	119139000		61.8252	102269073	3.72186e+07	6.07411e+07	3.64353e+07	5.83979e+07
61.8603	75266600	121522000		61.8746	101519739	3.69459e+07	6.02961e+07	3.83207e+07	6.12259e+07
61.9067	76894400	123903000		61.9241	100721244	3.66553e+07	5.98218e+07	4.02391e+07	6.40812e+07
61.9996	80100000	128580000		61.9735	99886047	3.63514e+07	5.93258e+07	4.37486e+07	6.92542e+07
62.046	81616600	130811000		62.023	99023951	3.60376e+07	5.88137e+07	4.5579e+07	7.19973e+07
62.0924	83026700	132908000		62.0724	98141597	3.57165e+07	5.82897e+07	4.73102e+07	7.46183e+07
62.1388	84289500	134812000		62.1219	97242281	3.53892e+07	5.77556e+07	4.89003e+07	7.70564e+07
62.2317	86205700	137781000		62.1713	96326072	3.50558e+07	5.72114e+07	5.11499e+07	8.05696e+07
62.2781	86781300	138712000		62.2208	95390223	3.47152e+07	5.66556e+07	5.20661e+07	8.20564e+07
62.3245	87059600	139196000		62.2702	94429828	3.43657e+07	5.60851e+07	5.26939e+07	8.31109e+07
62.371	87020200	139191000		62.3197	93438653	3.4005e+07	5.54964e+07	5.30152e+07	8.36946e+07
62.4174	86654200	138675000		62.3691	92410057	3.36306e+07	5.48855e+07	5.30236e+07	8.37895e+07
62.4638	85966200	137651000		62.4186	91337914	3.32405e+07	5.42487e+07	5.27257e+07	8.34023e+07
62.5102	84974000	136144000		62.4681	90217447	3.28327e+07	5.35833e+07	5.21413e+07	8.25607e+07
62.5567	83708500	134203000		62.5175	89045884	3.24063e+07	5.28874e+07	5.13022e+07	8.13156e+07
62.6031	82210700	131898000		62.567	87822902	3.19612e+07	5.21611e+07	5.02495e+07	7.97369e+07
62.6495	80529600	129310000		62.6164	86550795	3.14983e+07	5.14055e+07	4.90313e+07	7.79045e+07
62.6959	78717300	126530000		62.6659	85234377	3.10192e+07	5.06236e+07	4.76981e+07	7.59064e+07
62.7424	76825100	123643000		62.7153	83880638	3.05265e+07	4.98196e+07	4.62986e+07	7.38234e+07
62.7888	74899100	120725000		62.7648	82498176	3.00234e+07	4.89985e+07	4.48757e+07	7.17265e+07
62.8352	72976100	117834000		62.8142	81096489	2.95133e+07	4.8166e+07	4.34628e+07	6.9668e+07
62.8816	71080800	115006000		62.8637	79685205	2.89997e+07	4.73278e+07	4.20811e+07	6.76782e+07
62.9281	69224200	112249000		62.9131	78273301	2.84859e+07	4.64892e+07	4.07383e+07	6.57598e+07
63.0209	65603200	106867000		62.9626	76868430	2.79746e+07	4.56548e+07	3.76286e+07	6.12122e+07
63.0673	63799200	104153000		63.012	75476381	2.7468e+07	4.4828e+07	3.63312e+07	5.9325e+07
63.1138	61961100	101347000		63.0615	74100759	2.69674e+07	4.4011e+07	3.49937e+07	5.7336e+07
63.1602	60058200	98390200		63.1109	72742875	2.64732e+07	4.32045e+07	3.3585e+07	5.51857e+07
63.2066	58063000	95233500		63.1604	71401887	2.59852e+07	4.2408e+07	3.20778e+07	5.28255e+07
63.253	55956000	91845800		63.2098	70075141	2.55023e+07	4.162e+07	3.04537e+07	5.02258e+07
63.2995	53728600	88217600		63.2593	68758669	2.50232e+07	4.08382e+07	2.87054e+07	4.73794e+07
63.3459	51384700	84364300		63.3087	67447834	2.45462e+07	4.00596e+07	2.68385e+07	4.43047e+07
63.3923	48941400	80325100		63.3582	66137991	2.40695e+07	3.92816e+07	2.48719e+07	4.10435e+07
63.4387	46426900	76159900		63.4076	64825135	2.35917e+07	3.85019e+07	2.28352e+07	3.7658e+07
63.4852	43878600	71943400		63.4571	63506467	2.31118e+07	3.77187e+07	2.07668e+07	3.42247e+07
63.5316	41339100	67757200		63.5065	62180821	2.26294e+07	3.69313e+07	1.87097e+07	3.08259e+07
63.578	38852000	63682500		63.556	60848902	2.21446e+07	3.61403e+07	1.67074e+07	2.75422e+07
63.6244	36457700	59792100		63.6054	59513356	2.16586e+07	3.5347e+07	1.47991e+07	2.44451e+07
63.6709	34190500	56144300		63.6549	58178621	2.11729e+07	3.45543e+07	1.30176e+07	2.159e+07
63.7173	32074800	52778200		63.7043	56850636	2.06896e+07	3.37656e+07	1.13852e+07	1.90126e+07
63.7637	30124800	49712500		63.7538	55536413	2.02113e+07	3.2985e+07	9.91352e+06	1.67275e+07
63.8565	26725300	44459800		63.8033	54243519	1.97408e+07	3.22171e+07	6.98454e+06	1.22427e+07
63.903	25255700	42223100		63.8527	52979546	1.92808e+07	3.14664e+07	5.97494e+06	1.07567e+07
63.9494	23916500	40197800		63.9022	51751606	1.88339e+07	3.07371e+07	5.08262e+06	9.46073e+06
63.9958	22687800	38344300		63.9516	50565893	1.84024e+07	3.00328e+07	4.28544e+06	8.31147e+06
64.0422	21550600	36626400		64.0011	49427374	1.7988e+07	2.93566e+07	3.56258e+06	7.26977e+06
64.0887	20489400	35015100		64.0505	48339597	1.75922e+07	2.87106e+07	2.89725e+06	6.30454e+06
64.1351	19493700	33490500		64.1	47304641	1.72155e+07	2.80959e+07	2.2782e+06	5.39464e+06
64.1815	18557700	32041900		64.1494	46323206	1.68583e+07	2.7513e+07	1.69937e+06	4.52895e+06
64.2279	17680500	30666700		64.1989	45394789	1.65205e+07	2.69615e+07	1.16005e+06	3.70517e+06
64.2744	16864400	29367700		64.2483	44517945	1.62013e+07	2.64407e+07	663057	2.92695e+06
64.3208	16113200	28150000		64.2978	43690573	1.59002e+07	2.59493e+07	212961	2.20066e+06
64.3672	15430200	27017900		64.3472	42910194	1.56162e+07	2.54858e+07	-186037	1.53205e+06
64.4136	14816500	25972500		64.3967	42174192	1.53484e+07	2.50487e+07	-531885	923789
64.4601	14270100	25009900		64.4461	41479977	1.50957e+07	2.46364e+07	-825640	373507
64.5065	13784600	24121400		64.4956	40825078	1.48574e+07	2.42474e+07	-1.0728e+06	-126025
64.5529	13350000	23293600		64.545	40207141	1.46325e+07	2.38804e+07	-1.28252e+06	-586811
64.5993	12953600	22510900		64.5945	39623855	1.44202e+07	2.3534e+07	-1.46664e+06	-1.02308e+06
64.6922	12218600	21020900		64.6439	39072839	1.42197e+07	2.32067e+07	-2.00111e+06	-2.18581e+06
64.7386	11854600	20291800		64.6934	38551492	1.403e+07	2.28971e+07	-2.17538e+06	-2.60526e+06
64.785	11481200	19567500		64.7428	38056871	1.385e+07	2.26033e+07	-2.36877e+06	-3.03579e+06
64.8315	11094800	18851100		64.7923	37585597	1.36785e+07	2.23234e+07	-2.58366e+06	-3.47229e+06
64.8779	10697000	18150600		64.8417	37133847	1.35141e+07	2.20551e+07	-2.81706e+06	-3.90448e+06
64.9243	10293700	17476800		64.8912	36697423	1.33552e+07	2.17959e+07	-3.06153e+06	-4.31907e+06
64.9707	9894050	16841000		64.9406	36271921	1.32004e+07	2.15431e+07	-3.30633e+06	-4.70215e+06
65.0172	9509020	16252400		64.9901	35852977	1.30479e+07	2.12943e+07	-3.5389e+06	-5.04192e+06
65.0636	9149550	15715500		65.0395	35436587	1.28964e+07	2.1047e+07	-3.74683e+06	-5.33151e+06
65.11	8824760	15228500		65.089	35019461	1.27446e+07	2.07993e+07	-3.91982e+06	-5.57077e+06
65.1564	8540600	14783500		65.1385	34599366	1.25917e+07	2.05498e+07	-4.05109e+06	-5.76626e+06
65.2029	8298950	14367000		65.1879	34175439	1.24374e+07	2.0298e+07	-4.13846e+06	-5.93097e+06
65.2493	8097330	13962100		65.2374	33748412	1.2282e+07	2.00443e+07	-4.18467e+06	-6.08225e+06
65.2957	7929370	13551400		65.2868	33320728	1.21264e+07	1.97903e+07	-4.19699e+06	-6.23893e+06
65.3421	7785830	13120200		65.3363	32896528	1.1972e+07	1.95384e+07	-4.18615e+06	-6.41819e+06
65.3886	7656010	12659900		65.3857	32481486	1.18209e+07	1.92919e+07	-4.16492e+06	-6.63198e+06
65.4814	7396990	11659500		65.4352	32082528	1.16757e+07	1.90549e+07	-4.27875e+06	-7.39542e+06
65.5278	7253080	11146100		65.4846	31707425	1.15392e+07	1.88321e+07	-4.28615e+06	-7.68604e+06
65.5743	7095410	10654500		65.5341	31364308	1.14144e+07	1.86283e+07	-4.31895e+06	-7.97385e+06
65.6207	6925670	10213400		65.5835	31061152	1.1304e+07	1.84483e+07	-4.37836e+06	-8.23489e+06
65.6671	6748990	9850800		65.633	30805254	1.12109e+07	1.82963e+07	-4.46192e+06	-8.44551e+06
65.7135	6573030	9590400		65.6824	30602778	1.11372e+07	1.8176e+07	-4.56419e+06	-8.58565e+06
65.76	6406640	9447200		65.7319	30458381	1.10847e+07	1.80903e+07	-4.67803e+06	-8.64309e+06
65.8064	6258470	9424880		65.7813	30374965	1.10543e+07	1.80407e+07	-4.79584e+06	-8.61586e+06
65.8528	6135570	9514570		65.8308	30353571	1.10465e+07	1.8028e+07	-4.91096e+06	-8.51347e+06
65.8992	6042330	9695360		65.8802	30393414	1.1061e+07	1.80517e+07	-5.0187e+06	-8.35634e+06
65.9457	5979830	9936750		65.9297	30492044	1.10969e+07	1.81103e+07	-5.11709e+06	-8.17353e+06
65.9921	5945680	10202500		65.9791	30645625	1.11528e+07	1.82015e+07	-5.20713e+06	-7.999e+06
66.0385	5934400	10455600		66.0286	30849270	1.12269e+07	1.83224e+07	-5.29252e+06	-7.86685e+06
66.0849	5938210	10663100		66.078	31097423	1.13172e+07	1.84698e+07	-5.37902e+06	-7.80673e+06
66.1314	5948140	10800900		66.1275	31384219	1.14216e+07	1.86402e+07	-5.47347e+06	-7.83927e+06
66.1778	5955240	10856800		66.1769	31703806	1.15379e+07	1.883e+07	-5.58267e+06	-7.97319e+06
66.2242	5951740	10832400		66.2264	32050586	1.16641e+07	1.9036e+07	-5.71238e+06	-8.20355e+06
66.3171	5893040	10610900		66.2758	32419361	1.17983e+07	1.9255e+07	-5.90528e+06	-8.64408e+06
66.3635	5834950	10470500		66.3253	32805394	1.19388e+07	1.94843e+07	-6.10386e+06	-9.01376e+06
66.4099	5760530	10353500		66.3747	33204365	1.2084e+07	1.97212e+07	-6.32348e+06	-9.36772e+06
66.4563	5674930	10288800		66.4242	33612272	1.22325e+07	1.99635e+07	-6.55753e+06	-9.67469e+06
66.5028	5584910	10296600		66.4737	34025305	1.23828e+07	2.02088e+07	-6.79786e+06	-9.91221e+06
66.5492	5498120	10385200		66.5231	34439707	1.25336e+07	2.04549e+07	-7.03547e+06	-1.00697e+07
66.5956	5422330	10549700		66.5726	34851675	1.26835e+07	2.06996e+07	-7.26118e+06	-1.01499e+07
66.642	5364810	10772800		66.622	35257348	1.28311e+07	2.09406e+07	-7.46634e+06	-1.01678e+07
66.6885	5331900	11027900		66.6715	35652860	1.29751e+07	2.11755e+07	-7.64319e+06	-1.01476e+07
66.7349	5328800	11283600		66.7209	36034514	1.3114e+07	2.14021e+07	-7.78518e+06	-1.01185e+07
66.7813	5359460	11509200		66.7704	36399038	1.32466e+07	2.16186e+07	-7.88718e+06	-1.01094e+07
66.8277	5426580	11680300		66.8198	36743914	1.33722e+07	2.18235e+07	-7.94557e+06	-1.01432e+07
66.8742	5531740	11783700		66.8693	37067756	1.349e+07	2.20158e+07	-7.95827e+06	-1.02321e+07
66.9206	5675330	11820000		66.9187	37370668	1.36002e+07	2.21957e+07	-7.92492e+06	-1.03757e+07
66.967	5856570	11805300		66.9682	37654562	1.37036e+07	2.23643e+07	-7.84699e+06	-1.0559e+07
67.0134	6073350	11768500		67.0176	37923363	1.38014e+07	2.2524e+07	-7.72804e+06	-1.07555e+07
67.1063	6597420	11787600		67.0671	38183078	1.38959e+07	2.26783e+07	-7.29849e+06	-1.08907e+07
67.1527	6892500	11925900		67.1165	38441692	1.399e+07	2.28319e+07	-7.09752e+06	-1.0906e+07
67.1991	7198840	12194300		67.166	38708880	1.40873e+07	2.29905e+07	-6.88842e+06	-1.07962e+07
67.2456	7506910	12609200		67.2154	38995531	1.41916e+07	2.31608e+07	-6.68467e+06	-1.05516e+07
67.292	7806800	13169100		67.2649	39313146	1.43072e+07	2.33494e+07	-6.50037e+06	-1.01803e+07
67.3384	8089230	13854100		67.3143	39673094	1.44382e+07	2.35632e+07	-6.34893e+06	-9.70912e+06
67.3848	8346620	14627500		67.3638	40085865	1.45884e+07	2.38084e+07	-6.24176e+06	-9.18088e+06
67.4313	8574320	15440800		67.4132	40560299	1.4761e+07	2.40902e+07	-6.18672e+06	-8.64936e+06
67.4777	8771510	16240000		67.4627	41102948	1.49585e+07	2.44125e+07	-6.18702e+06	-8.17246e+06
67.5241	8941900	16973300		67.5121	41717571	1.51822e+07	2.47775e+07	-6.24031e+06	-7.80421e+06
67.5705	9093820	17599000		67.5616	42404863	1.54323e+07	2.51857e+07	-6.33851e+06	-7.58671e+06
67.6169	9239810	18091400		67.611	43162409	1.5708e+07	2.56356e+07	-6.46821e+06	-7.54425e+06
67.6634	9395450	18445400		67.6605	43984936	1.60074e+07	2.61242e+07	-6.61192e+06	-7.67877e+06
67.7098	9577800	18677700		67.71	44864782	1.63276e+07	2.66467e+07	-6.74977e+06	-7.96905e+06
67.7562	9803330	18824500		67.7594	45792605	1.66652e+07	2.71978e+07	-6.8619e+06	-8.37331e+06
67.8026	10085700	18937400		67.8089	46758232	1.70166e+07	2.77713e+07	-6.93095e+06	-8.83393e+06
67.8491	10434000	19075700		67.8583	47751613	1.73782e+07	2.83613e+07	-6.94417e+06	-9.28563e+06
67.9419	11332000	19653600		67.9078	48763734	1.77465e+07	2.89625e+07	-6.41451e+06	-9.30887e+06
67.9883	11865700	20175800		67.9572	49787478	1.81191e+07	2.95705e+07	-6.25338e+06	-9.3947e+06
68.0348	12434600	20876100		68.0067	50818277	1.84942e+07	3.01827e+07	-6.05961e+06	-9.30663e+06
68.0812	13017200	21742500		68.0561	51854562	1.88713e+07	3.07982e+07	-5.85415e+06	-9.05572e+06
68.1276	13590300	22741100		68.1056	52897897	1.9251e+07	3.14179e+07	-5.66075e+06	-8.67679e+06
68.174	14132200	23820600		68.155	53952832	1.9635e+07	3.20445e+07	-5.50277e+06	-8.22385e+06
68.2205	14625800	24919800		68.2045	55026469	2.00257e+07	3.26821e+07	-5.39989e+06	-7.76232e+06
68.2669	15060600	25976500		68.2539	56127766	2.04265e+07	3.33362e+07	-5.36589e+06	-7.35972e+06
68.3133	15434600	26936500		68.3034	57266663	2.0841e+07	3.40127e+07	-5.40636e+06	-7.07615e+06
68.3597	15755100	27761600		68.3528	58453108	2.12727e+07	3.47173e+07	-5.51764e+06	-6.95572e+06
68.4062	16037700	28435500		68.4023	59696073	2.17251e+07	3.54556e+07	-5.68739e+06	-7.02006e+06
68.4526	16304300	28965900		68.4517	61002642	2.22006e+07	3.62316e+07	-5.89629e+06	-7.26568e+06
68.499	16580500	29383400		68.5012	62377306	2.27009e+07	3.7048e+07	-6.12037e+06	-7.66464e+06
68.5454	16892000	29737200		68.5506	63821470	2.32264e+07	3.79058e+07	-6.33444e+06	-8.16858e+06
68.5919	17260700	30087500		68.6001	65333279	2.37766e+07	3.88037e+07	-6.51593e+06	-8.71619e+06
68.6383	17701700	30496500		68.6495	66907755	2.43496e+07	3.97388e+07	-6.64793e+06	-9.24233e+06
68.7311	18811800	31693700		68.699	68537236	2.49426e+07	4.07066e+07	-6.13084e+06	-9.01293e+06
68.7776	19461000	32539400		68.7484	70212094	2.55522e+07	4.17014e+07	-6.09117e+06	-9.16199e+06
68.824	20145000	33550700		68.7979	71921651	2.61743e+07	4.27168e+07	-6.02933e+06	-9.16606e+06
68.8704	20836100	34700900		68.8473	73655219	2.68052e+07	4.37464e+07	-5.96912e+06	-9.04548e+06
68.9168	21507000	35947600		68.8968	75403164	2.74413e+07	4.47845e+07	-5.93435e+06	-8.83695e+06
68.9633	22135100	37241200		68.9462	77157897	2.80799e+07	4.58267e+07	-5.94485e+06	-8.58554e+06
69.0097	22708300	38535400		68.9957	78914714	2.87193e+07	4.68702e+07	-6.011e+06	-8.33478e+06
69.0561	23228200	39798400		69.0452	80672379	2.9359e+07	4.79141e+07	-6.13077e+06	-8.11572e+06
69.1025	23713200	41021800		69.0946	82433442	2.99999e+07	4.89601e+07	-6.28667e+06	-7.93827e+06
69.149	24198800	42227500		69.1441	84204220	3.06443e+07	5.00118e+07	-6.4455e+06	-7.7843e+06
69.1954	24736000	43469500		69.1935	85994491	3.12958e+07	5.10751e+07	-6.55983e+06	-7.6056e+06
69.2418	25387900	44831400		69.243	87816899	3.19591e+07	5.21575e+07	-6.57116e+06	-7.32609e+06
69.2882	26223600	46419200		69.2924	89686144	3.26393e+07	5.32677e+07	-6.41573e+06	-6.8485e+06
69.3347	27311100	48349100		69.3419	91618036	3.33424e+07	5.44151e+07	-6.0313e+06	-6.06602e+06
69.3811	28710300	50733300		69.3913	93628488	3.40741e+07	5.56092e+07	-5.36376e+06	-4.8759e+06
69.4275	30464900	53664400		69.4408	95732557	3.48398e+07	5.68589e+07	-4.37489e+06	-3.19448e+06
69.4739	32597000	57201100		69.4902	97943588	3.56444e+07	5.81721e+07	-3.04745e+06	-970984
69.5668	37947600	66091700		69.5397	100272574	3.6492e+07	5.95553e+07	1.45557e+06	6.53635e+06
69.6132	41074500	71314600		69.5891	102727734	3.73855e+07	6.10136e+07	3.68896e+06	1.0301e+07
69.6596	44400800	76886000		69.6386	105314377	3.83269e+07	6.25499e+07	6.07391e+06	1.43361e+07
69.7061	47828400	82631200		69.688	108035014	3.9317e+07	6.41657e+07	8.51139e+06	1.84655e+07
69.7525	51251800	88356800		69.7375	110889725	4.03559e+07	6.58612e+07	1.08959e+07	2.24956e+07
69.7989	54568200	93870600		69.7869	113876721	4.1443e+07	6.76353e+07	1.31252e+07	2.62353e+07
69.8453	57687100	99002700		69.8364	116993035	4.25771e+07	6.94862e+07	1.511e+07	2.95165e+07
69.8918	60540300	103625000		69.8858	120235269	4.3757e+07	7.14119e+07	1.67833e+07	3.22131e+07
69.9382	63088600	107667000		69.9353	123600344	4.49817e+07	7.34105e+07	1.81069e+07	3.42565e+07
69.9846	65327100	111127000		69.9847	127086157	4.62503e+07	7.54809e+07	1.90768e+07	3.56461e+07
70.031	67286600	114073000		70.0342	130692112	4.75626e+07	7.76226e+07	1.9724e+07	3.64504e+07
70.0775	69032000	116641000		70.0836	134419465	4.89191e+07	7.98364e+07	2.01129e+07	3.68046e+07
70.1239	70657000	119023000		70.1331	138271489	5.03209e+07	8.21242e+07	2.03361e+07	3.68988e+07
70.1703	72276400	121447000		70.1825	142253422	5.17701e+07	8.44892e+07	2.05063e+07	3.69578e+07
70.2167	74015800	124159000		70.232	146372261	5.3269e+07	8.69355e+07	2.07468e+07	3.72235e+07
70.2632	76000300	127395000		70.2814	150636391	5.48209e+07	8.94682e+07	2.11794e+07	3.79268e+07
70.356	81135100	136209000		70.3309	155055126	5.6429e+07	9.20926e+07	2.47061e+07	4.41164e+07
70.4024	84436300	142028000		70.3804	159638195	5.80969e+07	9.48146e+07	2.63394e+07	4.72134e+07
70.4489	88269800	148825000		70.4298	164395222	5.98281e+07	9.764e+07	2.84417e+07	5.1185e+07
70.4953	92619800	156535000		70.4793	169335241	6.16259e+07	1.00574e+08	3.09939e+07	5.59609e+07
70.5417	97432100	165016000		70.5287	174466300	6.34932e+07	1.03622e+08	3.39389e+07	6.13944e+07
70.5881	102619000	174071000		70.5782	179795117	6.54325e+07	1.06787e+08	3.71865e+07	6.72845e+07
70.6346	108066000	183461000		70.6276	185326868	6.74457e+07	1.10072e+08	4.06203e+07	7.3389e+07
70.681	113641000	192927000		70.6771	191065033	6.9534e+07	1.1348e+08	4.4107e+07	7.94469e+07
70.7274	119208000	202212000		70.7265	197011317	7.1698e+07	1.17012e+08	4.751e+07	8.52002e+07
70.7738	124634000	211085000		70.776	203165608	7.39377e+07	1.20667e+08	5.06963e+07	9.04179e+07
70.8203	129803000	219356000		70.8254	209525951	7.62524e+07	1.24445e+08	5.35506e+07	9.49113e+07
70.8667	134622000	226892000		70.8749	216088505	7.86407e+07	1.28342e+08	5.59813e+07	9.85496e+07
70.9131	139028000	233623000		70.9243	222847456	8.11005e+07	1.32357e+08	5.79275e+07	1.01266e+08
70.9595	142994000	239543000		70.9738	229794898	8.36289e+07	1.36483e+08	5.93651e+07	1.0306e+08
71.006	146523000	244708000		71.0232	236920659	8.62221e+07	1.40715e+08	6.03009e+07	1.03993e+08
71.0524	149652000	249223000		71.0727	244212094	8.88757e+07	1.45046e+08	6.07763e+07	1.04177e+08
71.0988	152440000	253229000		71.1221	251653869	9.1584e+07	1.49466e+08	6.0856e+07	1.03763e+08
71.1917	157319000	260369000		71.1716	259227768	9.43403e+07	1.53964e+08	6.29787e+07	1.06405e+08
71.2381	159584000	263823000		71.221	266912541	9.7137e+07	1.58529e+08	6.2447e+07	1.05294e+08
71.2845	161841000	267384000		71.2705	274683858	9.99652e+07	1.63144e+08	6.18758e+07	1.0424e+08
71.3309	164158000	271150000		71.3199	282514355	1.02815e+08	1.67795e+08	6.1343e+07	1.03355e+08
71.3774	166584000	275186000		71.3694	290373841	1.05675e+08	1.72463e+08	6.09087e+07	1.02723e+08
71.4238	169149000	279521000		71.4188	298229627	1.08534e+08	1.77129e+08	6.06148e+07	1.02392e+08
71.4702	171865000	284154000		71.4683	306047005	1.11379e+08	1.81772e+08	6.04858e+07	1.02382e+08
71.5166	174734000	289061000		71.5177	313789837	1.14197e+08	1.86371e+08	6.0537e+07	1.0269e+08
71.563	177745000	294209000		71.5672	321421230	1.16974e+08	1.90903e+08	6.07707e+07	1.03306e+08
71.6095	180888000	299565000		71.6166	328904260	1.19698e+08	1.95348e+08	6.11904e+07	1.04217e+08
71.6559	184154000	305103000		71.6661	336202696	1.22354e+08	1.99682e+08	6.18003e+07	1.05421e+08
71.7023	187546000	310819000		71.7156	343281659	1.2493e+08	2.03887e+08	6.26161e+07	1.06932e+08
71.7487	191077000	316728000		71.765	350108220	1.27414e+08	2.07941e+08	6.36627e+07	1.08787e+08
71.7952	194775000	322873000		71.8145	356651858	1.29796e+08	2.11828e+08	6.49793e+07	1.11045e+08
71.8416	198677000	329311000		71.8639	362884787	1.32064e+08	2.1553e+08	6.66129e+07	1.13781e+08
71.888	202830000	336116000		71.9134	368782141	1.3421e+08	2.19032e+08	6.86197e+07	1.17084e+08
71.9809	212062000	351096000		71.9628	374322032	1.36226e+08	2.22323e+08	7.58356e+07	1.28773e+08
72.0273	217197000	359363000		72.0123	379485492	1.38106e+08	2.2539e+08	7.90915e+07	1.33973e+08
72.0737	222681000	368151000		72.0617	384256356	1.39842e+08	2.28223e+08	8.28392e+07	1.39928e+08
72.1201	228473000	377403000		72.1112	388621099	1.4143e+08	2.30816e+08	8.70428e+07	1.46587e+08
72.1666	234500000	387006000		72.1606	392568699	1.42867e+08	2.3316e+08	9.16331e+07	1.53846e+08
72.213	240650000	396788000		72.2101	396090536	1.44149e+08	2.35252e+08	9.65014e+07	1.61536e+08
72.2594	246775000	406526000		72.2595	399180366	1.45273e+08	2.37087e+08	1.01502e+08	1.69439e+08
72.3058	252701000	415952000		72.309	401834384	1.46239e+08	2.38663e+08	1.06462e+08	1.77289e+08
72.3523	258238000	424773000		72.3584	404051362	1.47046e+08	2.3998e+08	1.11192e+08	1.84793e+08
72.3987	263190000	432686000		72.4079	405832862	1.47694e+08	2.41038e+08	1.15496e+08	1.91648e+08
72.4451	267371000	439397000		72.4573	407183469	1.48186e+08	2.4184e+08	1.19185e+08	1.97557e+08
72.4915	270619000	444651000		72.5068	408111023	1.48523e+08	2.42391e+08	1.22096e+08	2.0226e+08
72.538	272810000	448243000		72.5562	408626785	1.48711e+08	2.42698e+08	1.24099e+08	2.05545e+08
72.5844	273864000	450036000		72.6057	408745487	1.48754e+08	2.42768e+08	1.2511e+08	2.07268e+08
72.6308	273759000	449974000		72.6551	408485241	1.48659e+08	2.42614e+08	1.251e+08	2.0736e+08
72.6772	272523000	448088000		72.7046	407867259	1.48434e+08	2.42246e+08	1.24089e+08	2.05842e+08
72.7237	270241000	444487000		72.754	406915388	1.48088e+08	2.41681e+08	1.22153e+08	2.02806e+08
72.8165	263090000	432945000		72.8035	405655453	1.4763e+08	2.40933e+08	1.1546e+08	1.92012e+08
72.8629	258572000	425533000		72.8529	404114453	1.47069e+08	2.40018e+08	1.11503e+08	1.85515e+08
72.9094	253685000	417430000		72.9024	402319654	1.46416e+08	2.38952e+08	1.07269e+08	1.78478e+08
72.9558	248616000	408939000		72.9518	400297641	1.4568e+08	2.37751e+08	1.02936e+08	1.71188e+08
73.0022	243537000	400344000		73.0013	398073411	1.4487e+08	2.3643e+08	9.86668e+07	1.63914e+08
73.0486	238587000	391892000		73.0508	395669576	1.43995e+08	2.35002e+08	9.45916e+07	1.5689e+08
73.0951	233874000	383777000		73.1002	393105761	1.43062e+08	2.33479e+08	9.08117e+07	1.50298e+08
73.1415	229464000	376138000		73.1497	390398236	1.42077e+08	2.31871e+08	8.7387e+07	1.44267e+08
73.1879	225388000	369057000		73.1991	387559838	1.41044e+08	2.30185e+08	8.4344e+07	1.38872e+08
73.2343	221643000	362562000		73.2486	384600174	1.39967e+08	2.28427e+08	8.16761e+07	1.34135e+08
73.2808	218200000	356634000		73.298	381526117	1.38848e+08	2.26602e+08	7.93518e+07	1.30032e+08
73.3272	215015000	351222000		73.3475	378342515	1.3769e+08	2.24711e+08	7.73254e+07	1.26511e+08
73.3736	212033000	346254000		73.3969	375053066	1.36492e+08	2.22757e+08	7.55406e+07	1.23497e+08
73.42	209201000	341648000		73.4464	371661269	1.35258e+08	2.20742e+08	7.39429e+07	1.20906e+08
73.4665	206475000	337324000		73.4958	368171342	1.33988e+08	2.1867e+08	7.2487e+07	1.18654e+08
73.5129	203821000	333214000		73.5453	364589021	1.32684e+08	2.16542e+08	7.11367e+07	1.16672e+08
73.6057	198677000	325444000		73.5947	360922124	1.3135e+08	2.14364e+08	6.73272e+07	1.1108e+08
73.6522	196194000	321732000		73.6442	357180856	1.29988e+08	2.12142e+08	6.62058e+07	1.0959e+08
73.6986	193791000	318126000		73.6936	353377747	1.28604e+08	2.09883e+08	6.51868e+07	1.08243e+08
73.745	191491000	314629000		73.7431	349527273	1.27203e+08	2.07596e+08	6.42881e+07	1.07033e+08
73.7914	189314000	311250000		73.7925	345645149	1.2579e+08	2.05291e+08	6.35239e+07	1.05959e+08
73.8379	187276000	307994000		73.842	341747355	1.24372e+08	2.02976e+08	6.29044e+07	1.05018e+08
73.8843	185381000	304861000		73.8914	337848993	1.22953e+08	2.0066e+08	6.24282e+07	1.04201e+08
73.9307	183624000	301841000		73.9409	333963083	1.21539e+08	1.98352e+08	6.20854e+07	1.03489e+08
73.9771	181988000	298919000		73.9903	330099414	1.20133e+08	1.96057e+08	6.18555e+07	1.02862e+08
74.0236	180446000	296071000		74.0398	326263575	1.18737e+08	1.93779e+08	6.17094e+07	1.02292e+08
74.07	178963000	293268000		74.0892	322456279	1.17351e+08	1.91518e+08	6.1612e+07	1.0175e+08
74.1164	177503000	290482000		74.1387	318673059	1.15974e+08	1.89271e+08	6.15288e+07	1.01211e+08
74.1628	176027000	287684000		74.1881	314904396	1.14603e+08	1.87033e+08	6.14244e+07	1.00651e+08
74.2093	174501000	284853000		74.2376	311136291	1.13231e+08	1.84795e+08	6.12697e+07	1.00058e+08
74.2557	172898000	281972000		74.287	307351248	1.11854e+08	1.82547e+08	6.10442e+07	9.94255e+07
74.3021	171200000	279034000		74.3365	303529596	1.10463e+08	1.80277e+08	6.0737e+07	9.87573e+07
74.3485	169399000	276034000		74.386	299651076	1.09052e+08	1.77973e+08	6.03475e+07	9.80609e+07
74.4414	165497000	269863000		74.4354	295696503	1.07612e+08	1.75624e+08	5.78847e+07	9.42386e+07
74.4878	163422000	266702000		74.4849	291649414	1.06139e+08	1.73221e+08	5.72825e+07	9.34813e+07
74.5342	161288000	263497000		74.5343	287497530	1.04629e+08	1.70755e+08	5.66595e+07	9.27423e+07
74.5807	159117000	260250000		74.5838	283233883	1.03077e+08	1.68222e+08	5.60402e+07	9.20276e+07
74.6271	156930000	256961000		74.6332	278857537	1.01484e+08	1.65623e+08	5.54458e+07	9.13379e+07
74.6735	154747000	253629000		74.6827	274373790	9.98524e+07	1.6296e+08	5.48946e+07	9.06689e+07
74.7199	152584000	250256000		74.7321	269793858	9.81856e+07	1.6024e+08	5.43984e+07	9.00161e+07
74.7664	150453000	246846000		74.7816	265134048	9.64898e+07	1.57472e+08	5.39632e+07	8.93737e+07
74.8128	148367000	243408000		74.831	260414493	9.47722e+07	1.54669e+08	5.35948e+07	8.87388e+07
74.8592	146331000	239961000		74.8805	255657550	9.3041e+07	1.51844e+08	5.329e+07	8.81171e+07
74.9056	144351000	236529000		74.9299	250886007	9.13045e+07	1.4901e+08	5.30465e+07	8.75191e+07
74.9521	142433000	233145000		74.9794	246121257	8.95705e+07	1.4618e+08	5.28625e+07	8.69651e+07
74.9985	140580000	229845000		75.0288	241381605	8.78456e+07	1.43365e+08	5.27344e+07	8.64801e+07
75.0449	138794000	226669000		75.0783	236680859	8.61349e+07	1.40573e+08	5.26591e+07	8.60961e+07
75.0913	137080000	223652000		75.1277	232027330	8.44413e+07	1.37809e+08	5.26387e+07	8.58429e+07
75.1378	135440000	220825000		75.1772	227423355	8.27658e+07	1.35075e+08	5.26742e+07	8.57504e+07
75.2306	132390000	215810000		75.2266	222865347	8.1107e+07	1.32367e+08	5.1283e+07	8.34426e+07
75.277	130982000	213627000		75.2761	218344420	7.94617e+07	1.29682e+08	5.15203e+07	8.39447e+07
75.3234	129652000	211643000		75.3255	213847486	7.78252e+07	1.27011e+08	5.18268e+07	8.46316e+07
75.3699	128401000	209834000		75.375	209358764	7.61916e+07	1.24345e+08	5.22094e+07	8.54886e+07
75.4163	127229000	208168000		75.4244	204861530	7.45549e+07	1.21674e+08	5.26741e+07	8.64937e+07
75.4627	126134000	206615000		75.4739	200339990	7.29094e+07	1.18989e+08	5.32246e+07	8.76262e+07
75.5091	125118000	205148000		75.5233	195781054	7.12503e+07	1.16281e+08	5.38677e+07	8.88669e+07
75.5556	124182000	203749000		75.5728	191175911	6.95743e+07	1.13546e+08	5.46077e+07	9.0203e+07
75.602	123328000	202406000		75.6222	186521202	6.78804e+07	1.10781e+08	5.54476e+07	9.16246e+07
75.6484	122555000	201119000		75.6717	181819741	6.61694e+07	1.07989e+08	5.63856e+07	9.313e+07
75.6948	121863000	199894000		75.7212	177080689	6.44447e+07	1.05174e+08	5.74183e+07	9.47197e+07
75.7413	121247000	198739000		75.7706	172319164	6.27118e+07	1.02346e+08	5.85352e+07	9.63927e+07
75.7877	120697000	197659000		75.8201	167555365	6.09781e+07	9.95169e+07	5.97189e+07	9.81421e+07
75.8341	120196000	196652000		75.8695	162813239	5.92524e+07	9.67004e+07	6.09436e+07	9.99516e+07
75.8805	119719000	195697000		75.919	158118864	5.75439e+07	9.39123e+07	6.21751e+07	1.01785e+08
75.927	119232000	194755000		75.9684	153498658	5.58625e+07	9.11682e+07	6.33695e+07	1.03587e+08
75.9734	118694000	193766000		76.0179	148977595	5.42172e+07	8.84829e+07	6.44768e+07	1.05283e+08
76.0662	117261000	191299000		76.0673	144577580	5.26159e+07	8.58696e+07	6.46451e+07	1.05429e+08
76.1127	116259000	189615000		76.1168	140316122	5.1065e+07	8.33386e+07	6.5194e+07	1.06276e+08
76.1591	114996000	187487000		76.1662	136205410	4.9569e+07	8.08971e+07	6.5427e+07	1.0659e+08
76.2055	113427000	184817000		76.2157	132251877	4.81302e+07	7.8549e+07	6.52968e+07	1.06268e+08
76.2519	111517000	181531000		76.2651	128456254	4.67489e+07	7.62946e+07	6.47681e+07	1.05236e+08
76.2984	109246000	177586000		76.3146	124814110	4.54234e+07	7.41314e+07	6.38226e+07	1.03455e+08
76.3448	106611000	172976000		76.364	121316802	4.41506e+07	7.20542e+07	6.24604e+07	1.00922e+08
76.3912	103626000	167739000		76.4135	117952728	4.29263e+07	7.00562e+07	6.06997e+07	9.76828e+07
76.4376	100322000	161951000		76.4629	114708772	4.17458e+07	6.81295e+07	5.85762e+07	9.38215e+07
76.4841	96747500	155726000		76.5124	111571775	4.06041e+07	6.62663e+07	5.61434e+07	8.94597e+07
76.5305	92962300	149202000		76.5618	108529901	3.94971e+07	6.44597e+07	5.34652e+07	8.47423e+07
76.5769	89034900	142534000		76.6113	105573784	3.84213e+07	6.27039e+07	5.06136e+07	7.98301e+07
76.6233	85037100	135875000		76.6607	102697334	3.73745e+07	6.09955e+07	4.76626e+07	7.48795e+07
76.6698	81039700	129366000		76.7102	99898148	3.63558e+07	5.9333e+07	4.46839e+07	7.0033e+07
76.7162	77107300	123127000		76.7596	97177500	3.53656e+07	5.77171e+07	4.17417e+07	6.54099e+07
76.7626	73294500	117240000		76.8091	94539934	3.44058e+07	5.61505e+07	3.88887e+07	6.10895e+07
76.8555	66184000	106678000		76.8585	91992496	3.34787e+07	5.46375e+07	3.27053e+07	5.20405e+07
76.9019	62929800	101988000		76.908	89543714	3.25875e+07	5.31831e+07	3.03423e+07	4.88049e+07
76.9483	59883800	97633400		76.9574	87202445	3.17354e+07	5.17925e+07	2.81484e+07	4.58409e+07
76.9947	57038600	93548500		77.0069	84976673	3.09254e+07	5.04706e+07	2.61132e+07	4.30779e+07
77.0412	54379900	89662500		77.0564	82872434	3.01596e+07	4.92208e+07	2.42203e+07	4.04417e+07
77.0876	51889400	85911000		77.1058	80892927	2.94392e+07	4.80451e+07	2.24502e+07	3.78659e+07
77.134	49548600	82245200		77.1553	79037943	2.87641e+07	4.69434e+07	2.07845e+07	3.53018e+07
77.1804	47340700	78638200		77.2047	77303621	2.8133e+07	4.59133e+07	1.92077e+07	3.27249e+07
77.2269	45252900	75086900		77.2542	75682586	2.7543e+07	4.49505e+07	1.77099e+07	3.01364e+07
77.2733	43277000	71611400		77.3036	74164428	2.69905e+07	4.40488e+07	1.62865e+07	2.75626e+07
77.3197	41409500	68249800		77.3531	72736479	2.64709e+07	4.32007e+07	1.49386e+07	2.50491e+07
77.3661	39651000	65051300		77.4025	71384798	2.5979e+07	4.23979e+07	1.3672e+07	2.26534e+07
77.4126	38004300	62066900		77.452	70095272	2.55097e+07	4.1632e+07	1.24946e+07	2.04349e+07
77.459	36473100	59341000		77.5014	68854721	2.50582e+07	4.08952e+07	1.14149e+07	1.84458e+07
77.5054	35060100	56903600		77.5509	67651896	2.46204e+07	4.01808e+07	1.04397e+07	1.67228e+07
77.5518	33765600	54764400		77.6003	66478275	2.41933e+07	3.94837e+07	9.57227e+06	1.52807e+07
77.5983	32586400	52911100		77.6498	65328601	2.37749e+07	3.88009e+07	8.81147e+06	1.41102e+07
77.6911	30542500	49910300		77.6992	64201102	2.33646e+07	3.81313e+07	7.1779e+06	1.1779e+07
77.7375	29654500	48650200		77.7487	63097375	2.29629e+07	3.74757e+07	6.69158e+06	1.11745e+07
77.784	28837100	47465400		77.7981	62021987	2.25716e+07	3.6837e+07	6.26554e+06	1.06284e+07
77.8304	28076200	46297600		77.8476	60981812	2.2193e+07	3.62192e+07	5.88319e+06	1.00784e+07
77.8768	27359100	45101400		77.897	59985184	2.18303e+07	3.56273e+07	5.52879e+06	9.47413e+06
77.9232	26676300	43850100		77.9465	59040968	2.14867e+07	3.50665e+07	5.18962e+06	8.78363e+06
77.9697	26021600	42538600		77.9959	58157627	2.11652e+07	3.45418e+07	4.85639e+06	7.99677e+06
78.0161	25392900	41183200		78.0454	57342385	2.08685e+07	3.40576e+07	4.52438e+06	7.12557e+06
78.0625	24791300	39818100		78.0948	56600549	2.05985e+07	3.3617e+07	4.19275e+06	6.20108e+06
78.1089	24220900	38489800		78.1443	55935065	2.03564e+07	3.32218e+07	3.86454e+06	5.26803e+06
78.1554	23686900	37250100		78.1937	55346316	2.01421e+07	3.28721e+07	3.54481e+06	4.37801e+06
78.2018	23194800	36148000		78.2432	54832183	1.9955e+07	3.25667e+07	3.23981e+06	3.58127e+06
78.2482	22748800	35222500		78.2926	54388337	1.97935e+07	3.23031e+07	2.95534e+06	2.91939e+06
78.2946	22350400	34497000		78.3421	54008709	1.96553e+07	3.20776e+07	2.6951e+06	2.41936e+06
78.3411	21998300	33975700		78.3916	53686088	1.95379e+07	3.1886e+07	2.46041e+06	2.08968e+06
78.3875	21687600	33643200		78.441	53412762	1.94384e+07	3.17237e+07	2.24918e+06	1.91951e+06
78.4339	21410300	33466300		78.4905	53181130	1.93541e+07	3.15861e+07	2.05618e+06	1.88019e+06
78.5268	20913600	33388200		78.5399	52984234	1.92825e+07	3.14692e+07	1.63113e+06	1.91903e+06
78.5732	20671600	33380600		78.5894	52816122	1.92213e+07	3.13693e+07	1.45032e+06	2.01128e+06
78.6196	20420600	33329700		78.6388	52672063	1.91689e+07	3.12838e+07	1.25174e+06	2.04594e+06
78.666	20153700	33201400		78.6883	52548564	1.91239e+07	3.12104e+07	1.02979e+06	1.99099e+06
78.7125	19867900	32977400		78.7377	52443216	1.90856e+07	3.11478e+07	782326	1.82956e+06
78.7589	19564000	32656500		78.7872	52354421	1.90533e+07	3.10951e+07	510741	1.5614e+06
78.8053	19246900	32253700		78.8366	52281027	1.90265e+07	3.10515e+07	220351	1.20219e+06
78.8517	18924800	31797000		78.8861	52221950	1.9005e+07	3.10164e+07	-80248.7	780578
78.8982	18608100	31322100		78.9355	52175849	1.89883e+07	3.0989e+07	-380171	333059
78.9446	18308200	30866900		78.985	52140883	1.89755e+07	3.09683e+07	-667346	-101373
78.991	18036000	30465600		79.0344	52114629	1.8966e+07	3.09527e+07	-929992	-487080
79.0374	17801000	30144000		79.0839	52094162	1.89585e+07	3.09405e+07	-1.15754e+06	-796524
79.0839	17609600	29915500		79.1333	52076306	1.8952e+07	3.09299e+07	-1.34244e+06	-1.01442e+06
79.1303	17465200	29780300		79.1828	52058021	1.89454e+07	3.09191e+07	-1.48019e+06	-1.13876e+06
79.1767	17367300	29725600		79.2322	52036900	1.89377e+07	3.09065e+07	-1.5704e+06	-1.18091e+06
79.2231	17312300	29728000		79.2817	52011712	1.89285e+07	3.08916e+07	-1.61624e+06	-1.16355e+06
79.316	17303900	29783500		79.3311	51982895	1.8918e+07	3.08744e+07	-1.61415e+06	-1.09094e+06
79.3624	17333900	29777200		79.3806	51952969	1.89072e+07	3.08567e+07	-1.57326e+06	-1.07946e+06
79.4088	17375900	29718100		79.43	51926755	1.88976e+07	3.08411e+07	-1.52172e+06	-1.123e+06
79.4552	17423400	29596300		79.4795	51911394	1.8892e+07	3.0832e+07	-1.46863e+06	-1.23567e+06
79.5017	17472400	29414000		79.5289	51916101	1.88937e+07	3.08348e+07	-1.42134e+06	-1.42077e+06
79.5481	17521300	29184600		79.5784	51951668	1.89067e+07	3.08559e+07	-1.38539e+06	-1.67129e+06
79.5945	17571100	28931300		79.6279	52029748	1.89351e+07	3.09023e+07	-1.364e+06	-1.97097e+06
79.6409	17624900	28683000		79.6773	52161950	1.89832e+07	3.09808e+07	-1.35831e+06	-2.29779e+06
79.6874	17687300	28470400		79.7268	52358845	1.90549e+07	3.10977e+07	-1.36757e+06	-2.62733e+06
79.7338	17763300	28321700		79.7762	52628971	1.91532e+07	3.12582e+07	-1.38988e+06	-2.93647e+06
79.7802	17857700	28258300		79.8257	52977913	1.92802e+07	3.14654e+07	-1.42247e+06	-3.20711e+06
79.8266	17974100	28292300		79.8751	53407606	1.94365e+07	3.17206e+07	-1.46244e+06	-3.42832e+06
79.8731	18114200	28424900		79.9246	53915890	1.96215e+07	3.20225e+07	-1.50732e+06	-3.59761e+06
79.9195	18278000	28646800		79.974	54496412	1.98328e+07	3.23673e+07	-1.55479e+06	-3.7205e+06
79.9659	18463200	28939700		80.0235	55138914	2.00666e+07	3.27489e+07	-1.60341e+06	-3.80921e+06
80.0123	18666300	29279700		80.0729	55829859	2.03181e+07	3.31593e+07	-1.65177e+06	-3.87958e+06
80.0588	18882500	29640600		80.1224	56553424	2.05814e+07	3.3589e+07	-1.69889e+06	-3.94843e+06
80.1516	19335900	30334200		80.1718	57292717	2.08504e+07	3.40281e+07	-1.51454e+06	-3.69393e+06
80.198	19566100	30638300		80.2213	58031170	2.11192e+07	3.44667e+07	-1.55309e+06	-3.82842e+06
80.2445	19796400	30910000		80.2707	58753951	2.13822e+07	3.4896e+07	-1.58583e+06	-3.986e+06
80.2909	20027900	31158800		80.3202	59449290	2.16353e+07	3.5309e+07	-1.60738e+06	-4.15019e+06
80.3373	20263000	31402000		80.3696	60109570	2.18756e+07	3.57012e+07	-1.61258e+06	-4.29915e+06
80.3837	20505800	31662900		80.4191	60732089	2.21021e+07	3.60709e+07	-1.59633e+06	-4.40799e+06
80.4302	20760600	31966500		80.4685	61319397	2.23159e+07	3.64197e+07	-1.55527e+06	-4.45321e+06
80.4766	21031500	32336000		80.518	61879172	2.25196e+07	3.67522e+07	-1.48809e+06	-4.41618e+06
80.523	21321600	32789000		80.5674	62423606	2.27177e+07	3.70755e+07	-1.39612e+06	-4.28654e+06
80.5694	21631800	33334800		80.6169	62968374	2.2916e+07	3.73991e+07	-1.28418e+06	-4.06429e+06
80.6159	21960600	33972300		80.6663	63531226	2.31208e+07	3.77334e+07	-1.16022e+06	-3.76109e+06
80.6623	22303900	34689900		80.7158	64130344	2.33389e+07	3.80892e+07	-1.03495e+06	-3.39933e+06
80.7087	22655300	35466500		80.7652	64782597	2.35762e+07	3.84766e+07	-920924	-3.01012e+06
80.7551	23006500	36273600		80.8147	65501837	2.3838e+07	3.89038e+07	-831476	-2.63021e+06
80.8016	23348400	37078900		80.8641	66297405	2.41275e+07	3.93763e+07	-779106	-2.29742e+06
80.848	23672100	37850000		80.9136	67172978	2.44462e+07	3.98964e+07	-774052	-2.04635e+06
80.9408	24237500	39182400		80.9631	68125866	2.47929e+07	4.04623e+07	-555435	-1.27991e+06
80.9873	24472500	39711000		81.0125	69146832	2.51645e+07	4.10687e+07	-691993	-1.35769e+06
81.0337	24677100	40143500		81.062	70220481	2.55552e+07	4.17064e+07	-878125	-1.56287e+06
81.0801	24857000	40490900		81.1114	71326150	2.59576e+07	4.23631e+07	-1.10061e+06	-1.87217e+06
81.1265	25020800	40773500		81.1609	72439295	2.63627e+07	4.30242e+07	-1.34191e+06	-2.2507e+06
81.173	25179800	41018900		81.2103	73533190	2.67608e+07	4.36739e+07	-1.58101e+06	-2.655e+06
81.2194	25346100	41258800		81.2598	74580870	2.71421e+07	4.42962e+07	-1.79599e+06	-3.03736e+06
81.2658	25531400	41524600		81.3092	75557084	2.74974e+07	4.4876e+07	-1.96597e+06	-3.35136e+06
81.3122	25746000	41844200		81.3587	76440143	2.78187e+07	4.54004e+07	-2.07274e+06	-3.55624e+06
81.3587	25996900	42238700		81.4081	77213464	2.81002e+07	4.58597e+07	-2.10327e+06	-3.62105e+06
81.4051	26287200	42719900		81.4576	77866719	2.83379e+07	4.62477e+07	-2.05071e+06	-3.52784e+06
81.4515	26615700	43288900		81.507	78396442	2.85307e+07	4.65624e+07	-1.91499e+06	-3.27346e+06
81.4979	26976800	43936400		81.5565	78806080	2.86798e+07	4.68057e+07	-1.70297e+06	-2.86926e+06
81.5444	27360900	44643800		81.6059	79105469	2.87887e+07	4.69835e+07	-1.42782e+06	-2.33967e+06
81.5908	27755500	45385200		81.6554	79309790	2.88631e+07	4.71048e+07	-1.10758e+06	-1.71963e+06
81.6372	28145900	46130400		81.7048	79438094	2.89098e+07	4.7181e+07	-763875	-1.05063e+06
81.6836	28517500	46848000		81.7543	79511536	2.89365e+07	4.72247e+07	-419003	-376651
81.7765	29150400	48088500		81.8037	79551463	2.8951e+07	4.72484e+07	199366	840135
81.8229	29391200	48569700		81.8532	79577538	2.89605e+07	4.72639e+07	430677	1.30585e+06
81.8693	29573600	48943200		81.9026	79606060	2.89709e+07	4.72808e+07	602697	1.66241e+06
81.9158	29696300	49208000		81.9521	79648612	2.89864e+07	4.73061e+07	709911	1.90194e+06
81.9622	29761400	49370500		82.0015	79711173	2.90092e+07	4.73432e+07	752243	2.02728e+06
82.0086	29774300	49442800		82.051	79793735	2.90392e+07	4.73923e+07	735097	2.05054e+06
82.055	29742000	49440800		82.1004	79890486	2.90744e+07	4.74497e+07	667586	1.99108e+06
82.1015	29673100	49381300		82.1499	79990492	2.91108e+07	4.75091e+07	562291	1.87218e+06
82.1479	29576400	49280100		82.1993	80078828	2.9143e+07	4.75616e+07	433443	1.71852e+06
82.1943	29459900	49149700		82.2488	80138049	2.91645e+07	4.75968e+07	295391	1.55294e+06
82.2407	29331000	48998000		82.2983	80149838	2.91688e+07	4.76038e+07	162201	1.39424e+06
82.2872	29195000	48827700		82.3477	80096706	2.91495e+07	4.75722e+07	45537	1.2555e+06
82.3336	29056200	48636800		82.3972	79963563	2.9101e+07	4.74931e+07	-44808.5	1.14367e+06
82.38	28917000	48419300		82.4466	79739035	2.90193e+07	4.73598e+07	-102296	1.05953e+06
82.4264	28778500	48166700		82.4961	79416403	2.89019e+07	4.71681e+07	-123381	998552
82.4729	28641000	47870100		82.5455	78994091	2.87482e+07	4.69173e+07	-107190	952778
82.5657	28365600	47119600		82.595	78475679	2.85595e+07	4.66094e+07	-193925	510181
82.6121	28225100	46662200		82.6444	77869432	2.83389e+07	4.62493e+07	-113795	412852
82.6586	28080200	46156100		82.6939	77187419	2.80907e+07	4.58443e+07	-10491	311823
82.705	27928500	45611800		82.7433	76444312	2.78203e+07	4.54029e+07	108247	208880
82.7514	27767200	45044100		82.7928	75655981	2.75334e+07	4.49347e+07	233843	109397
82.7978	27592600	44469900		82.8422	74838025	2.72357e+07	4.44489e+07	356920	21009.2
82.8443	27401000	43906700		82.8917	74004388	2.69323e+07	4.39538e+07	468704	-47065
82.8907	27187900	43369600		82.9411	73166176	2.66272e+07	4.34559e+07	560653	-86321.9
82.9371	26948900	42870000		82.9906	72330785	2.63232e+07	4.29598e+07	625676	-89754.3
82.9835	26680000	42413100		83.04	71501419	2.60214e+07	4.24672e+07	658606	-54065.2
83.0299	26378000	41997600		83.0895	70677032	2.57214e+07	4.19775e+07	656623	20066.8
83.0764	26040900	41614900		83.1389	69852685	2.54214e+07	4.14879e+07	619527	126975
83.1228	25668700	41250300		83.1884	69020266	2.51184e+07	4.09935e+07	550268	256777
83.1692	25263000	40884100		83.2378	68169508	2.48088e+07	4.04882e+07	454183	395872
83.2156	24827900	40494300		83.2873	67289190	2.44884e+07	3.99654e+07	339455	528923
83.2621	24368900	40058800		83.3367	66368400	2.41533e+07	3.94185e+07	215557	640312
83.3549	23408500	38979300		83.3862	65397732	2.38001e+07	3.8842e+07	-391590	137326
83.4013	22922800	38314700		83.4356	64370320	2.34262e+07	3.82318e+07	-503385	82941.1
83.4478	22443100	37566300		83.4851	63282593	2.30303e+07	3.75857e+07	-587230	-19420.2
83.4942	21974900	36744100		83.5345	62134708	2.26126e+07	3.6904e+07	-637683	-159852
83.5406	21521600	35865600		83.584	60930610	2.21744e+07	3.61888e+07	-652777	-323196
83.587	21084800	34954100		83.6335	59677737	2.17184e+07	3.54447e+07	-633621	-490572
83.6335	20663500	34036100		83.6829	58386413	2.12485e+07	3.46777e+07	-584972	-641610
83.6799	20255300	33138300		83.7324	57068988	2.0769e+07	3.38952e+07	-513723	-756945
83.7263	19856600	32284600		83.7818	55738835	2.02849e+07	3.31052e+07	-428343	-820621
83.7727	19463500	31493800		83.8313	54409280	1.98011e+07	3.23156e+07	-337580	-821753
83.8192	19072700	30777100		83.8807	53092615	1.93219e+07	3.15335e+07	-249208	-756440
83.8656	18682000	30137200		83.9302	51799237	1.88512e+07	3.07654e+07	-169211	-628158
83.912	18290900	29568300		83.9796	50537039	1.83919e+07	3.00157e+07	-100962	-447395
83.9584	17900500	29056500		84.0291	49311067	1.79457e+07	2.92875e+07	-45195.9	-231048
84.0049	17513500	28582200		84.0785	48123482	1.75135e+07	2.85822e+07	0.00188097	0.000750735
84.0513	17133600	28122300		84.128	46973810	1.70951e+07	2.78994e+07	38498.3	222930
84.0977	16764600	27652700		84.1774	45859429	1.66895e+07	2.72375e+07	75053.1	415199
84.1906	16070200	26602400		84.2269	44776245	1.62953e+07	2.65942e+07	-225146	8239.8
84.237	15745400	25994000		84.2763	43719446	1.59107e+07	2.59665e+07	-165346	27509.3
84.2834	15431900	25323400		84.3258	42684269	1.5534e+07	2.53517e+07	-102116	-28263.3
84.3298	15123700	24595300		84.3752	41666675	1.51637e+07	2.47473e+07	-39984.8	-151979
84.3763	14812800	23821100		84.4247	40663864	1.47987e+07	2.41517e+07	14066.6	-330575
84.4227	14490000	23017500		84.4741	39674559	1.44387e+07	2.35641e+07	51302.7	-546592
84.4691	14146600	22204500		84.5236	38699060	1.40837e+07	2.29847e+07	62914.5	-780210
84.5155	13775100	21402400		84.573	37739036	1.37343e+07	2.24145e+07	40794.4	-1.01212e+06
84.562	13370900	20630400		84.6225	36797097	1.33915e+07	2.18551e+07	-20607.3	-1.22467e+06
84.6084	12933000	19903600		84.6719	35876220	1.30564e+07	2.13081e+07	-123374	-1.40453e+06
84.6548	12465100	19232300		84.7214	34979059	1.27299e+07	2.07753e+07	-264772	-1.54297e+06
84.7477	11473100	18067300		84.7708	34107283	1.24126e+07	2.02575e+07	-939508	-2.19019e+06
84.7941	10974300	17565000		84.8203	33260982	1.21046e+07	1.97548e+07	-1.13031e+06	-2.18985e+06
84.8405	10492900	17102900		84.8697	32438252	1.18052e+07	1.92662e+07	-1.3123e+06	-2.1633e+06
84.8869	10042600	16667600		84.9192	31635002	1.15129e+07	1.87891e+07	-1.47027e+06	-2.12152e+06
84.9798	9275710	15820900		84.9687	30845046	1.12254e+07	1.83199e+07	-1.94968e+06	-2.49904e+06
85.0262	8967720	15384600		85.0181	30060457	1.09399e+07	1.78539e+07	-1.97213e+06	-2.46934e+06
85.0726	8706950	14927500		85.0676	29272204	1.0653e+07	1.73858e+07	-1.94604e+06	-2.45827e+06
85.1191	8484690	14444500		85.117	28470970	1.03614e+07	1.69099e+07	-1.8767e+06	-2.46539e+06
85.1655	8288290	13933800		85.1665	27648116	1.00619e+07	1.64212e+07	-1.77364e+06	-2.48737e+06
85.2119	8102830	13396800		85.2159	26796681	9.75207e+06	1.59155e+07	-1.64924e+06	-2.51868e+06
85.2583	7913150	12836900		85.2654	25912304	9.43022e+06	1.53902e+07	-1.51707e+06	-2.55331e+06
85.3048	7705850	12259000		85.3148	24993984	9.09602e+06	1.48448e+07	-1.39017e+06	-2.58579e+06
85.3512	7471200	11668800		85.3643	24044581	8.7505e+06	1.42809e+07	-1.2793e+06	-2.61211e+06
85.3976	7204500	11072000		85.4137	23070991	8.39619e+06	1.37027e+07	-1.19169e+06	-2.63066e+06
85.444	6906750	10474100		85.4632	22083960	8.03698e+06	1.31164e+07	-1.13023e+06	-2.64233e+06
85.4905	6584570	9880250		85.5126	21097523	7.67799e+06	1.25305e+07	-1.09342e+06	-2.6503e+06
85.5369	6249340	9295090		85.5621	20128121	7.32519e+06	1.19548e+07	-1.07585e+06	-2.6597e+06
85.5833	5915640	8723260		85.6115	19193439	6.98504e+06	1.13996e+07	-1.0694e+06	-2.67639e+06
85.6297	5599310	8169550		85.661	18311080	6.66392e+06	1.08756e+07	-1.06461e+06	-2.70603e+06
85.6762	5315190	7639150		85.7104	17497156	6.36771e+06	1.03922e+07	-1.05252e+06	-2.75302e+06
85.7226	5075140	7137710		85.7599	16764961	6.10124e+06	9.95729e+06	-1.0261e+06	-2.81958e+06
85.8154	4750130	6246060		85.8093	16123811	5.86791e+06	9.57649e+06	-1.11778e+06	-3.33043e+06
85.8619	4662090	5867730		85.8588	15578180	5.66934e+06	9.25242e+06	-1.00725e+06	-3.38469e+06
85.9083	4612230	5541100		85.9082	15127199	5.50522e+06	8.98457e+06	-892987	-3.44347e+06
85.9547	4586380	5269420		85.9577	14764594	5.37325e+06	8.7692e+06	-786875	-3.49978e+06
86.0011	4568020	5053860		86.0071	14479045	5.26934e+06	8.59961e+06	-701315	-3.54575e+06
86.0476	4540330	4893240		86.0566	14254980	5.18779e+06	8.46653e+06	-647462	-3.57329e+06
86.094	4488260	4783950		86.106	14073706	5.12182e+06	8.35886e+06	-633561	-3.57491e+06
86.1404	4400360	4720150		86.1555	13914815	5.064e+06	8.26449e+06	-663636	-3.54434e+06
86.1868	4270040	4694250		86.2049	13757717	5.00682e+06	8.17118e+06	-736783	-3.47693e+06
86.2333	4096200	4697560		86.2544	13583202	4.94331e+06	8.06753e+06	-847112	-3.36997e+06
86.2797	3883040	4721060		86.3039	13374875	4.8675e+06	7.9438e+06	-984456	-3.22274e+06
86.3261	3639290	4756120		86.3533	13120341	4.77486e+06	7.79262e+06	-1.13557e+06	-3.0365e+06
86.3725	3376810	4795170		86.4028	12812063	4.66267e+06	7.60953e+06	-1.28586e+06	-2.81436e+06
86.419	3108930	4832080		86.4522	12447793	4.5301e+06	7.39317e+06	-1.42117e+06	-2.56109e+06
86.4654	2848670	4862270		86.5017	12030564	4.37826e+06	7.14537e+06	-1.52959e+06	-2.2831e+06
86.5118	2607170	4882620		86.5511	11568234	4.21001e+06	6.87077e+06	-1.60284e+06	-1.98815e+06
86.6047	2208910	4885780		86.6006	11072639	4.02965e+06	6.57642e+06	-1.82074e+06	-1.69064e+06
86.6511	2057010	4865090		86.65	10558427	3.84251e+06	6.27101e+06	-1.7855e+06	-1.40592e+06
86.6975	1933990	4826350		86.6995	10041670	3.65445e+06	5.9641e+06	-1.72046e+06	-1.13775e+06
86.7439	1834710	4765850		86.7489	9538404	3.4713e+06	5.66519e+06	-1.63659e+06	-899338
86.7903	1752790	4678660		86.7984	9063201	3.29836e+06	5.38295e+06	-1.54557e+06	-704288
86.8368	1681890	4558820		86.8478	8627900	3.13994e+06	5.12441e+06	-1.45805e+06	-565588
86.8832	1616720	4399880		86.8973	8240624	2.999e+06	4.89439e+06	-1.38228e+06	-494512
86.9296	1553780	4195730		86.9467	7905151	2.87691e+06	4.69514e+06	-1.32313e+06	-499413
86.976	1491630	3941560		86.9962	7620672	2.77338e+06	4.52618e+06	-1.28175e+06	-584621
87.0225	1430770	3634900		87.0456	7381992	2.68652e+06	4.38442e+06	-1.25575e+06	-749520
87.0689	1373040	3276470		87.0951	7180096	2.61304e+06	4.26451e+06	-1.24e+06	-988037
87.1153	1320860	2870920		87.1445	7003062	2.54861e+06	4.15936e+06	-1.22775e+06	-1.28844e+06
87.1617	1276250	2427050		87.194	6837218	2.48826e+06	4.06086e+06	-1.21201e+06	-1.63381e+06
87.2082	1240070	1957690		87.2434	6668429	2.42683e+06	3.96061e+06	-1.18676e+06	-2.00292e+06
87.2546	1211420	1479120		87.2929	6483409	2.3595e+06	3.85072e+06	-1.14808e+06	-2.3716e+06
87.301	1187470	1010010		87.3423	6270943	2.28217e+06	3.72453e+06	-1.0947e+06	-2.71452e+06
87.3474	1163670	570116		87.3918	6022891	2.1919e+06	3.5772e+06	-1.02823e+06	-3.00709e+06
87.4403	1093850	-147107		87.4412	5734931	2.0871e+06	3.40617e+06	-993254	-3.55328e+06
87.4867	1037180	-393639		87.4907	5406936	1.96774e+06	3.21137e+06	-930557	-3.60501e+06
87.5331	961400	-552074		87.5401	5043001	1.83529e+06	2.99521e+06	-873891	-3.54729e+06
87.5796	866221	-619167		87.5896	4651102	1.69267e+06	2.76245e+06	-826447	-3.38162e+06
87.626	754413	-597652		87.6391	4242430	1.54394e+06	2.51973e+06	-789528	-3.11738e+06
87.6724	631711	-496105		87.6885	3830476	1.39402e+06	2.27505e+06	-762308	-2.77116e+06
87.7188	506236	-328329		87.738	3429944	1.24825e+06	2.03716e+06	-742018	-2.36549e+06
87.7653	387492	-112336		87.7874	3055582	1.11201e+06	1.81482e+06	-724521	-1.92715e+06
87.8117	285088	131024		87.8369	2721047	990266	1.61612e+06	-705178	-1.4851e+06
87.8581	207373	379636		87.8863	2437895	887219	1.44795e+06	-679846	-1.06831e+06
87.9045	160210	611774		87.9358	2214756	806013	1.31542e+06	-645803	-703646
87.951	146066	807717		87.9852	2056776	748519	1.22159e+06	-602453	-413873
87.9974	163591	951207		88.0347	1965348	715246	1.16729e+06	-551655	-216081
88.0438	207747	1030610		88.0841	1938140	705344	1.15113e+06	-497597	-120518
88.0902	270494	1039750		88.1336	1969394	716718	1.16969e+06	-446224	-129941
88.1831	411665	851864		88.183	2050474	746226	1.21785e+06	-334561	-365983
88.2295	470407	671219		88.2325	2170571	789932	1.28918e+06	-319525	-617958
88.2759	511181	451684		88.2819	2317529	843415	1.37646e+06	-332234	-924777
88.3224	530335	211677		88.3314	2478691	902066	1.47218e+06	-371731	-1.2605e+06
88.3688	527953	-28819		88.3808	2641706	961392	1.569e+06	-433439	-1.59782e+06
88.4152	507696	-250023		88.4303	2795231	1.01726e+06	1.66018e+06	-509568	-1.91021e+06
88.4616	476060	-434129		88.4797	2929485	1.06612e+06	1.73992e+06	-590063	-2.17405e+06
88.5081	441188	-566979		88.5292	3036617	1.10511e+06	1.80355e+06	-663923	-2.37053e+06
88.5545	411415	-639453		88.5786	3110898	1.13214e+06	1.84767e+06	-720729	-2.48712e+06
88.6009	393775	-648438		88.6281	3148715	1.14591e+06	1.87013e+06	-752132	-2.51857e+06
88.6473	392717	-597221		88.6775	3148432	1.1458e+06	1.86996e+06	-753087	-2.46718e+06
88.6938	409238	-495276		88.727	3110116	1.13186e+06	1.84721e+06	-722621	-2.34248e+06
88.7402	440589	-357372		88.7764	3035210	1.1046e+06	1.80272e+06	-664010	-2.16009e+06
88.7866	480592	-202075		88.8259	2926166	1.06491e+06	1.73795e+06	-584323	-1.94003e+06
88.833	520547	-49757		88.8753	2786115	1.01395e+06	1.65477e+06	-493399	-1.70453e+06
88.8795	550587	79708		88.9248	2618576	952974	1.55526e+06	-402387	-1.47555e+06
88.9259	561275	169322		88.9743	2427253	883346	1.44163e+06	-322071	-1.27231e+06
89.0187	498248	187908		89.0237	2215920	806436	1.31611e+06	-308188	-1.1282e+06
89.0652	420574	114213		89.0732	1988385	723630	1.18097e+06	-303056	-1.06676e+06
89.1116	316711	-3544		89.1226	1748528	636339	1.03851e+06	-319628	-1.04206e+06
89.158	195208	-147896		89.1721	1500385	546033	891131	-350825	-1.03903e+06
89.2044	67553	-296052		89.2215	1248235	454268	741370	-386715	-1.03742e+06
89.2509	-53329	-422410		89.271	996686	362722	591966	-416051	-1.01438e+06
89.2973	-154850	-501555		89.3204	750682	273194	445856	-428044	-947411
89.3437	-226497	-511436		89.3699	515469	187594	306155	-414091	-817591
89.3901	-261299	-436328		89.4193	296460	107890	176078	-369189	-612406
89.4366	-256813	-269218		89.4688	99022	36036.9	58812.6	-292850	-328031
89.483	-215447	-13266		89.5182	-71810	-26133.7	-42650.4	-189313	29384.4
89.5294	-144109	317864		89.5677	-211670	-77032.7	-125718	-67076.3	443582
89.5758	-53229	700909		89.6171	-317200	-115438	-188396	62209.1	889305
89.6223	44712	1105100		89.6666	-386384	-140616	-229487	185328	1.33459e+06
89.6687	136913	1495230		89.716	-418802	-152414	-248741	289327	1.74397e+06
89.7151	211967	1835370		89.7655	-415803	-151323	-246960	363290	2.08233e+06
89.808	280428	2241720		89.8149	-380535	-138487	-226013	418915	2.46773e+06
89.8544	268876	2266240		89.8644	-317852	-115675	-188783	384551	2.45502e+06
89.9008	230457	2162270		89.9138	-234065	-85182.9	-139019	315640	2.30129e+06
89.9472	172214	1938160		89.9633	-136560	-49698.1	-81107.7	221912	2.01927e+06
89.9937	103238	1613840		90.0127	-33316	-12124.6	-19787.5	115363	1.63363e+06
90.0401	33200	1218690		90.0622	67654	24621.2	40182	8578.79	1.17851e+06
90.0865	-29099	788313		90.1116	158870	57817.3	94358.4	-86916.3	693955
90.1329	-76939	360563		90.1611	233943	85138.5	138947	-162077	221616
90.1794	-106471	-28593		90.2105	288038	104825	171076	-211296	-199669
90.2258	-116983	-348965		90.26	318216	115808	188999	-232791	-537964
90.2722	-110629	-579289		90.3095	323633	117779	192217	-228408	-771506
90.3186	-91688	-709255		90.3589	305547	111197	181475	-202885	-890730
90.3651	-65519	-740206		90.4084	267149	97223.1	158669	-162742	-898875
90.4115	-37398	-684433		90.4578	213229	77600.1	126644	-114998	-811077
90.4579	-11479	-563189		90.5073	149710	54483.7	88917.9	-65962.7	-652107
90.5043	9967	-403715		90.5567	83070	30231.5	49338.1	-20264.5	-453053
90.5972	41145	-87288		90.6062	19737	7182.85	11722.5	33962.1	-99010.5
90.6436	56150	17805		90.6556	-34507	-12558.1	-20494.9	68708.1	38299.9
90.69	75636	63493		90.7051	-75054	-27314.3	-44577.2	102950	108070
90.7364	102673	42697		90.7545	-98880	-35985.2	-58728.3	138658	101425
90.7829	138592	-42162		90.804	-104790	-38136.1	-62238.4	176728	20076.4
90.8293	182209	-179897		90.8534	-93485	-34021.8	-55524	216231	-124373
90.8757	229500	-352348		90.9029	-67447	-24545.9	-40059.1	254046	-312289
90.9221	273812	-536924		90.9523	-30637	-11149.7	-18196.4	284962	-518728
90.9686	306626	-709542		91.0018	11943	4346.4	7093.36	302280	-716635
91.015	318770	-847576		91.0512	54806	19945.5	32551.2	298825	-880127
91.0614	301911	-932429		91.1007	92560	33685.2	54974.6	268226	-987404
91.1078	250087	-951446		91.1501	120504	43854.8	71571.5	206232	-1.02302e+06
91.1543	161032	-898976		91.1996	135147	49183.8	80268.5	111848	-979244
91.2007	37054	-776501		91.249	134598	48984	79942.4	-11930	-856443
91.2471	-114714	-591926		91.2985	118812	43239.1	70566.6	-157953	-662493
91.2935	-282752	-358163		91.3479	89634	32620.4	53236.7	-315372	-411400
91.34	-452280	-91305		91.3974	50668	18439.5	30093.5	-470720	-121398
91.4328	-730651	473285		91.4468	6951	2529.67	4128.44	-733181	469157
91.4792	-809926	740030		91.4963	-35509	-12922.7	-21090	-797003	761120
91.5257	-835360	980414		91.5458	-70316	-25590	-41763.1	-809770	1.02218e+06
91.5721	-803039	1186890		91.5952	-91295	-33224.8	-54223.3	-769814	1.24111e+06
91.6185	-715069	1355480		91.6447	-93109	-33885	-55300.7	-681184	1.41078e+06
91.6649	-579327	1485240		91.6941	-71790	-26126.4	-42638.6	-553201	1.52788e+06
91.7114	-408455	1577550		91.7436	-25142	-9149.89	-14932.7	-399305	1.59248e+06
91.7578	-218211	1635240		91.793	47011	17108.6	27921.5	-235320	1.60732e+06
91.8042	-25444	1661870		91.8425	142800	51969	84813.9	-77413	1.57706e+06
91.8506	154028	1661250		91.8919	258459	94060.6	153508	59967.4	1.50774e+06
91.8971	307337	1637190		91.9414	388681	141452	230851	165885	1.40634e+06
91.9435	425971	1593570		91.9908	527120	191834	313075	234137	1.2805e+06
91.9899	506507	1534630		92.0403	667010	242744	396160	263763	1.13847e+06
92.0363	550572	1465330		92.0897	801821	291805	476229	258767	989101
92.0828	564054	1391680		92.1392	925909	336965	549929	227089	841751
92.1292	555711	1320860		92.1886	1035073	376692	614766	179019	706094
92.222	512462	1221100		92.2381	1126990	410144	669358	102318	551742
92.2685	493780	1209430		92.2875	1201437	437237	713575	56543	495855
92.3149	483082	1233330		92.337	1260339	458673	748559	24408.9	484771
92.3613	480346	1297700		92.3864	1307567	475861	776609	4485.28	521091
92.4077	482150	1404110		92.4359	1348559	490779	800956	-8628.87	603154
92.4542	482652	1550080		92.4853	1389757	505772	825425	-23120	724655
92.5006	475046	1728770		92.5348	1437948	523310	854047	-48264.1	874723
92.547	453247	1929270		92.5842	1499548	545728	890633	-92481	1.03864e+06
92.5934	413500	2137370		92.6337	1579922	574978	938370	-161478	1.199e+06
92.6399	355612	2336840		92.6831	1682795	612417	999470	-256805	1.33737e+06
92.6863	283581	2511170		92.7326	1809828	658648	1.07492e+06	-375067	1.43625e+06
92.7327	205479	2645330		92.782	1960414	713450	1.16436e+06	-507971	1.48097e+06
92.7791	132580	2727650		92.8315	2131701	775786	1.26609e+06	-643206	1.46156e+06
92.8256	77841	2751320		92.881	2318875	843904	1.37726e+06	-766063	1.37406e+06
92.872	53971	2715440		92.9304	2515671	915524	1.49414e+06	-861553	1.2213e+06
92.9184	71395	2625420		92.9799	2715065	988089	1.61257e+06	-916694	1.01285e+06
92.9648	136448	2492810		93.0293	2910100	1.05907e+06	1.72841e+06	-922620	764401
93.0577	407575	2170340		93.0788	3094753	1.12627e+06	1.83808e+06	-718693	332259
93.1041	598608	2023110		93.1282	3264768	1.18814e+06	1.93906e+06	-589534	84051.4
93.1505	808950	1914710		93.1777	3418361	1.24404e+06	2.03028e+06	-435089	-115573
93.197	1022330	1865030		93.2271	3556728	1.29439e+06	2.11246e+06	-272064	-247434
93.2434	1222960	1890160		93.2766	3684275	1.34081e+06	2.18822e+06	-117852	-298058
93.2898	1398130	2001130		93.326	3808565	1.38604e+06	2.26204e+06	12085.2	-260908
93.3362	1540420	2203300		93.3755	3939926	1.43385e+06	2.34006e+06	106569	-136758
93.3827	1649300	2496320		93.4249	4090776	1.48875e+06	2.42965e+06	160551	66666.7
93.4291	1731760	2874630		93.4744	4274667	1.55567e+06	2.53887e+06	176087	335757
93.4755	1801820	3328550		93.5238	4505178	1.63956e+06	2.67578e+06	162258	652769
93.5219	1879050	3845510		93.5733	4794681	1.74492e+06	2.84773e+06	134130	997783
93.5684	1986100	4411610		93.6227	5153136	1.87537e+06	3.06063e+06	110728	1.35098e+06
93.6148	2145760	5013010		93.6722	5586999	2.03327e+06	3.31831e+06	112493	1.6947e+06
93.6612	2377810	5637210		93.7216	6098349	2.21936e+06	3.62202e+06	158448	2.01519e+06
93.7076	2696140	6273970		93.7711	6684316	2.43261e+06	3.97005e+06	263528	2.30392e+06
93.7541	3106640	6915900		93.8205	7336893	2.6701e+06	4.35763e+06	436537	2.55827e+06
93.8469	4181650	8200560		93.87	8043133	2.92712e+06	4.77709e+06	1.25453e+06	3.42347e+06
93.8933	4813230	8842480		93.9194	8785760	3.19739e+06	5.21817e+06	1.61584e+06	3.62431e+06
93.9398	5474570	9486660		93.9689	9544149	3.47339e+06	5.6686e+06	2.00118e+06	3.81806e+06
93.9862	6136800	10136100		94.0183	10295596	3.74686e+06	6.11491e+06	2.38994e+06	4.02119e+06
94.0326	6771590	10793600		94.0678	11016804	4.00933e+06	6.54326e+06	2.76226e+06	4.25034e+06
94.079	7354290	11460800		94.1172	11685460	4.25267e+06	6.9404e+06	3.10162e+06	4.5204e+06
94.1255	7866490	12137500		94.1667	12281762	4.46968e+06	7.29456e+06	3.39681e+06	4.84294e+06
94.1719	8297620	12821200		94.2162	12789805	4.65457e+06	7.59631e+06	3.64305e+06	5.22489e+06
94.2183	8645540	13506400		94.2656	13198677	4.80337e+06	7.83915e+06	3.84217e+06	5.66725e+06
94.2647	8915820	14184500		94.3151	13503206	4.9142e+06	8.02002e+06	4.00162e+06	6.16448e+06
94.3112	9120120	14844300		94.3645	13704249	4.98736e+06	8.13943e+06	4.13276e+06	6.70487e+06
94.3576	9273730	15471900		94.414	13808551	5.02532e+06	8.20138e+06	4.24841e+06	7.27052e+06
94.404	9392850	16051300		94.4634	13828138	5.03245e+06	8.21301e+06	4.3604e+06	7.83829e+06
94.4504	9491820	16565800		94.5129	13779318	5.01468e+06	8.18401e+06	4.47714e+06	8.38179e+06
94.4968	9580910	16998500		94.5623	13681357	4.97903e+06	8.12583e+06	4.60188e+06	8.87267e+06
94.5433	9664930	17333900		94.6118	13554965	4.93304e+06	8.05076e+06	4.73189e+06	9.28314e+06
94.6361	9808040	17665200		94.6612	13420685	4.88417e+06	7.97101e+06	4.92387e+06	9.69419e+06
94.6825	9850680	17648500		94.7107	13297358	4.83929e+06	7.89776e+06	5.01139e+06	9.75074e+06
94.729	9859090	17511100		94.7601	13200756	4.80413e+06	7.84039e+06	5.05496e+06	9.67071e+06
94.7754	9822680	17261700		94.8096	13142538	4.78294e+06	7.80581e+06	5.03974e+06	9.45589e+06
94.8218	9734180	16915400		94.859	13129578	4.77823e+06	7.79811e+06	4.95595e+06	9.11729e+06
94.8682	9591580	16492900		94.9085	13163750	4.79066e+06	7.81841e+06	4.80092e+06	8.67449e+06
94.9147	9399140	16019500		94.9579	13242162	4.8192e+06	7.86498e+06	4.57994e+06	8.15452e+06
94.9611	9167480	15523100		95.0074	13357825	4.86129e+06	7.93367e+06	4.30619e+06	7.58943e+06
95.0075	8912640	15032700		95.0568	13500681	4.91328e+06	8.01852e+06	3.99936e+06	7.01418e+06
95.0539	8654290	14575400		95.1063	13658907	4.97086e+06	8.1125e+06	3.68343e+06	6.4629e+06
95.1004	8413310	14174800		95.1557	13820351	5.02962e+06	8.20838e+06	3.38369e+06	5.96642e+06
95.1468	8209180	13849000		95.2052	13973990	5.08553e+06	8.29964e+06	3.12365e+06	5.54936e+06
95.1932	8057510	13609400		95.2546	14111243	5.13548e+06	8.38116e+06	2.92203e+06	5.22824e+06
95.2396	7968070	13459700		95.3041	14227043	5.17762e+06	8.44993e+06	2.79045e+06	5.00977e+06
95.2861	7943720	13396800		95.3535	14320538	5.21165e+06	8.50546e+06	2.73207e+06	4.89134e+06
95.3325	7980270	13411000		95.403	14395383	5.23889e+06	8.54992e+06	2.74138e+06	4.86108e+06
95.3789	8067310	13488200		95.4524	14459550	5.26224e+06	8.58803e+06	2.80507e+06	4.90017e+06
95.4718	8331370	13764300		95.5019	14524705	5.28595e+06	8.62672e+06	3.04542e+06	5.13758e+06
95.5182	8474800	13930900		95.5514	14605196	5.31525e+06	8.67453e+06	3.15955e+06	5.25637e+06
95.5646	8606510	14099700		95.6008	14716716	5.35583e+06	8.74077e+06	3.25068e+06	5.35893e+06
95.611	8717450	14263600		95.6503	14874817	5.41337e+06	8.83467e+06	3.30408e+06	5.42893e+06
95.6575	8804370	14420500		95.6997	15093341	5.49289e+06	8.96446e+06	3.31148e+06	5.45604e+06
95.7039	8870110	14572800		95.7492	15382986	5.5983e+06	9.13649e+06	3.27181e+06	5.43631e+06
95.7503	8922820	14726200		95.7986	15750097	5.73191e+06	9.35453e+06	3.19091e+06	5.37167e+06
95.7967	8974510	14888400		95.8481	16195818	5.89412e+06	9.61926e+06	3.08039e+06	5.26914e+06
95.8432	9038990	15066600		95.8975	16715696	6.08332e+06	9.92803e+06	2.95567e+06	5.13857e+06
95.8896	9129630	15266400		95.947	17299771	6.29588e+06	1.02749e+07	2.83375e+06	4.99147e+06
95.936	9257280	15490000		95.9964	17933178	6.52639e+06	1.06511e+07	2.73089e+06	4.83887e+06
95.9824	9428630	15735900		96.0459	18597201	6.76805e+06	1.10455e+07	2.66058e+06	4.69038e+06
96.0289	9645270	15998600		96.0953	19270696	7.01315e+06	1.14455e+07	2.63212e+06	4.55307e+06
96.0753	9903570	16269500		96.1448	19931778	7.25374e+06	1.18382e+07	2.64983e+06	4.43133e+06
96.1217	10195300	16538900		96.1942	20559611	7.48223e+06	1.22111e+07	2.71307e+06	4.32784e+06
96.1681	10509200	16797400		96.2437	21136158	7.69205e+06	1.25535e+07	2.81715e+06	4.2439e+06
96.261	11152100	17258700		96.2931	21647715	7.87822e+06	1.28573e+07	3.27388e+06	4.40137e+06
96.3074	11458000	17462000		96.3426	22086116	8.03776e+06	1.31177e+07	3.42024e+06	4.34429e+06
96.3538	11742900	17656700		96.392	22449472	8.17e+06	1.33335e+07	3.5729e+06	4.32318e+06
96.4003	12003000	17856500		96.4415	22742392	8.2766e+06	1.35075e+07	3.7264e+06	4.34901e+06
96.4467	12238300	18078400		96.4909	22975628	8.36148e+06	1.3646e+07	3.87682e+06	4.43238e+06
96.4931	12451800	18340100		96.5404	23165211	8.43048e+06	1.37586e+07	4.02132e+06	4.58148e+06
96.5395	12647500	18657100		96.5898	23331098	8.49085e+06	1.38571e+07	4.15665e+06	4.79995e+06
96.586	12830000	19040200		96.6393	23495480	8.55067e+06	1.39548e+07	4.27933e+06	5.08542e+06
96.6324	13002400	19492400		96.6887	23680861	8.61814e+06	1.40649e+07	4.38426e+06	5.42752e+06
96.6788	13165600	20007500		96.7382	23908110	8.70084e+06	1.41999e+07	4.46476e+06	5.80765e+06
96.7252	13317800	20570100		96.7876	24194606	8.8051e+06	1.437e+07	4.5127e+06	6.20009e+06
96.7717	13454800	21156300		96.8371	24552689	8.93542e+06	1.45827e+07	4.51938e+06	6.57361e+06
96.8181	13570800	21735900		96.8866	24988516	9.09403e+06	1.48415e+07	4.47677e+06	6.89436e+06
96.8645	13660200	22276100		96.936	25501432	9.28069e+06	1.51462e+07	4.37951e+06	7.12992e+06
96.9109	13718600	22745800		96.9855	26083927	9.49268e+06	1.54921e+07	4.22592e+06	7.25365e+06
96.9574	13745300	23119200		97.0349	26722168	9.72495e+06	1.58712e+07	4.02035e+06	7.24798e+06
97.0502	13722500	23524800		97.0844	27397076	9.97057e+06	1.62721e+07	3.75193e+06	7.25273e+06
97.0966	13695200	23562200		97.1338	28085844	1.02212e+07	1.66812e+07	3.47396e+06	6.88105e+06
97.1431	13679100	23514800		97.1833	28763771	1.0468e+07	1.70838e+07	3.21115e+06	6.431e+06
97.1895	13693600	23415300		97.2327	29406269	1.07018e+07	1.74654e+07	2.99182e+06	5.9499e+06
97.2359	13757100	23303500		97.2822	29990848	1.09145e+07	1.78126e+07	2.84258e+06	5.4909e+06
97.2823	13885100	23221300		97.3316	30498914	1.10994e+07	1.81144e+07	2.78568e+06	5.10694e+06
97.3288	14087400	23207500		97.3811	30917249	1.12517e+07	1.83628e+07	2.83574e+06	4.84468e+06
97.3752	14366100	23293000		97.4305	31239017	1.13688e+07	1.85539e+07	2.99734e+06	4.73907e+06
97.4216	14714800	23496700		97.48	31464232	1.14507e+07	1.86877e+07	3.26407e+06	4.809e+06
97.468	15118900	23823700		97.5294	31599649	1.15e+07	1.87681e+07	3.61889e+06	5.05558e+06
97.5145	15557000	24264300		97.5789	31658091	1.15213e+07	1.88028e+07	4.03572e+06	5.46147e+06
97.5609	16002900	24796000		97.6283	31657284	1.1521e+07	1.88024e+07	4.48192e+06	5.99364e+06
97.6073	16429300	25386800		97.6778	31618289	1.15068e+07	1.87792e+07	4.92251e+06	6.6076e+06
97.6537	16811500	25999900		97.7272	31563708	1.14869e+07	1.87468e+07	5.32457e+06	7.25312e+06
97.7002	17129900	26599200		97.7767	31515771	1.14695e+07	1.87183e+07	5.66042e+06	7.88089e+06
97.7466	17373900	27154300		97.8261	31494533	1.14618e+07	1.87057e+07	5.91215e+06	8.44861e+06
97.793	17542600	27645300		97.8756	31516282	1.14697e+07	1.87186e+07	6.07293e+06	8.92669e+06
97.8859	17702200	28420700		97.925	31592337	1.14973e+07	1.87638e+07	6.20485e+06	9.65692e+06
97.9323	17738000	28731100		97.9745	31728295	1.15468e+07	1.88445e+07	6.19117e+06	9.88657e+06
97.9787	17782100	29024800		98.0239	31923824	1.1618e+07	1.89607e+07	6.16412e+06	1.00641e+07
98.0251	17863100	29334200		98.0734	32172965	1.17087e+07	1.91086e+07	6.15445e+06	1.02256e+07
98.0716	18004900	29690800		98.1228	32464946	1.18149e+07	1.92821e+07	6.18999e+06	1.04087e+07
98.118	18223400	30119300		98.1723	32785387	1.19315e+07	1.94724e+07	6.29187e+06	1.06469e+07
98.1644	18524500	30633200		98.2218	33117797	1.20525e+07	1.96698e+07	6.47199e+06	1.09634e+07
98.2108	18903000	31232800		98.2712	33445216	1.21717e+07	1.98643e+07	6.73134e+06	1.13685e+07
98.2573	19344200	31904300		98.3207	33751839	1.22833e+07	2.00464e+07	7.06095e+06	1.18579e+07
98.3037	19825800	32622800		98.3701	34024495	1.23825e+07	2.02083e+07	7.44332e+06	1.24145e+07
98.3501	20322600	33356300		98.4196	34253817	1.24659e+07	2.03445e+07	7.85666e+06	1.30118e+07
98.3965	20810500	34072500		98.469	34435029	1.25319e+07	2.04522e+07	8.27862e+06	1.36203e+07
98.4429	21272000	34746300		98.5185	34568284	1.25804e+07	2.05313e+07	8.69162e+06	1.4215e+07
98.4894	21699800	35366300		98.5679	34658502	1.26132e+07	2.05849e+07	9.08659e+06	1.47814e+07
98.5358	22100700	35941100		98.6174	34714793	1.26337e+07	2.06183e+07	9.467e+06	1.53228e+07
98.5822	22496200	36502700		98.6668	34749475	1.26463e+07	2.06389e+07	9.84988e+06	1.58638e+07
98.6751	23426100	37830100		98.7163	34776819	1.26563e+07	2.06552e+07	1.07698e+07	1.71749e+07
98.7215	24062000	38763200		98.7657	34811648	1.26689e+07	2.06758e+07	1.13931e+07	1.80874e+07
98.7679	24884900	40001800		98.8152	34867917	1.26894e+07	2.07093e+07	1.21955e+07	1.92925e+07
98.8143	25943500	41635500		98.8646	34957416	1.2722e+07	2.07624e+07	1.32215e+07	2.08731e+07
98.9072	28893400	46345700		98.9141	35088722	1.27698e+07	2.08404e+07	1.61236e+07	2.55053e+07
98.9536	30796700	49469600		98.9635	35266485	1.28345e+07	2.0946e+07	1.79622e+07	2.85236e+07
99	32953500	53069400		99.013	35491120	1.29162e+07	2.10794e+07	2.00373e+07	3.199e+07
99.0465	35309500	57062700		99.0624	35758914	1.30137e+07	2.12385e+07	2.22958e+07	3.58242e+07
99.0929	37789100	61326500		99.1119	36062543	1.31242e+07	2.14188e+07	2.46649e+07	3.99077e+07
99.1393	40301200	65705200		99.1613	36391917	1.32441e+07	2.16144e+07	2.70571e+07	4.40908e+07
99.1857	42745600	70022600		99.2108	36735286	1.3369e+07	2.18184e+07	2.93766e+07	4.82042e+07
99.2322	45022200	74095900		99.2602	37080467	1.34946e+07	2.20234e+07	3.15276e+07	5.20725e+07
99.2786	47038300	77751500		99.3097	37416095	1.36168e+07	2.22227e+07	3.34215e+07	5.55288e+07
99.325	48716900	80840000		99.3591	37732745	1.3732e+07	2.24108e+07	3.49849e+07	5.84292e+07
99.3714	50002800	83248700		99.4086	38023844	1.3838e+07	2.25837e+07	3.61648e+07	6.0665e+07
99.4179	50866900	84911600		99.458	38286266	1.39335e+07	2.27395e+07	3.69334e+07	6.21721e+07
99.5107	51350400	85993200		99.5075	38520565	1.40187e+07	2.28787e+07	3.73317e+07	6.31145e+07
99.5571	51045100	85533300		99.557	38730847	1.40953e+07	2.30036e+07	3.69498e+07	6.25297e+07
99.6036	50460500	84556900		99.6064	38924275	1.41656e+07	2.31185e+07	3.62949e+07	6.14384e+07
99.65	49677700	83213100		99.6559	39110295	1.42333e+07	2.3229e+07	3.54444e+07	5.99841e+07
99.6964	48783700	81663600		99.7053	39299649	1.43023e+07	2.33414e+07	3.44814e+07	5.83222e+07
99.7428	47864100	80068900		99.7548	39503296	1.43764e+07	2.34624e+07	3.34877e+07	5.66065e+07
99.7893	46996600	78574700		99.8042	39731366	1.44594e+07	2.35978e+07	3.25372e+07	5.49769e+07
99.8357	46246000	77301800		99.8537	39992211	1.45543e+07	2.37528e+07	3.16917e+07	5.3549e+07
99.8821	45660900	76338000		99.9031	40291726	1.46633e+07	2.39306e+07	3.09976e+07	5.24074e+07
99.9285	45271300	75734500		99.9526	40632936	1.47875e+07	2.41333e+07	3.04838e+07	5.16012e+07
99.975	45089000	75505300		100.002	41015933	1.49269e+07	2.43608e+07	3.01621e+07	5.11445e+07
100.021	45108500	75630200		100.052	41438153	1.50805e+07	2.46116e+07	3.0028e+07	5.10186e+07
100.068	45309900	76061100		100.101	41894953	1.52468e+07	2.48829e+07	3.00631e+07	5.11782e+07
100.114	45661900	76728700		100.15	42380423	1.54234e+07	2.51712e+07	3.02385e+07	5.15575e+07
100.161	46125700	77551000		100.2	42888346	1.56083e+07	2.54729e+07	3.05174e+07	5.20781e+07
100.207	46658200	78441600		100.249	43413198	1.57993e+07	2.57846e+07	3.08589e+07	5.2657e+07
100.3	47756600	80100000		100.299	43951059	1.5995e+07	2.61041e+07	3.17616e+07	5.39959e+07
100.346	48243200	80728600		100.348	44500357	1.61949e+07	2.64303e+07	3.20483e+07	5.42983e+07
100.393	48643800	81153700		100.398	45062330	1.63995e+07	2.67641e+07	3.22443e+07	5.43896e+07
100.439	48933000	81342500		100.447	45641166	1.66101e+07	2.71079e+07	3.23229e+07	5.42346e+07
100.486	49093000	81277600		100.496	46243802	1.68294e+07	2.74658e+07	3.22636e+07	5.38118e+07
100.532	49113800	80956700		100.546	46879373	1.70607e+07	2.78433e+07	3.20531e+07	5.31134e+07
100.578	48992900	80391300		100.595	47558377	1.73078e+07	2.82466e+07	3.16851e+07	5.21447e+07
100.625	48736100	79605700		100.645	48291645	1.75747e+07	2.86821e+07	3.11614e+07	5.09236e+07
100.671	48357200	78636600		100.694	49089201	1.7865e+07	2.91558e+07	3.04922e+07	4.94808e+07
100.718	47877900	77531700		100.744	49959146	1.81816e+07	2.96725e+07	2.96963e+07	4.78592e+07
100.764	47327600	76349400		100.793	50906677	1.85264e+07	3.02352e+07	2.88012e+07	4.61142e+07
100.811	46742400	75157200		100.843	51933360	1.89e+07	3.0845e+07	2.78424e+07	4.43122e+07
100.857	46164400	74029700		100.892	53036720	1.93016e+07	3.15003e+07	2.68628e+07	4.25294e+07
100.903	45639200	73045900		100.942	54210232	1.97286e+07	3.21973e+07	2.59106e+07	4.08486e+07
100.95	45214200	72285400		100.991	55443700	2.01775e+07	3.29299e+07	2.50367e+07	3.93555e+07
100.996	44935500	71823000		101.04	56724012	2.06435e+07	3.36904e+07	2.4292e+07	3.81326e+07
101.089	44973600	72036100		101.09	58036213	2.1121e+07	3.44697e+07	2.38526e+07	3.75664e+07
101.136	45345700	72787700		101.139	59364794	2.16045e+07	3.52588e+07	2.37412e+07	3.75289e+07
101.182	45968300	73979800		101.189	60695070	2.20887e+07	3.60489e+07	2.38796e+07	3.79309e+07
101.228	46833300	75585000		101.238	62014532	2.25688e+07	3.68326e+07	2.42645e+07	3.87524e+07
101.275	47915800	77546300		101.288	63314039	2.30418e+07	3.76044e+07	2.4874e+07	3.99419e+07
101.321	49174400	79779400		101.337	64588716	2.35057e+07	3.83615e+07	2.56687e+07	4.14179e+07
101.368	50553300	82176900		101.387	65838488	2.39605e+07	3.91038e+07	2.65928e+07	4.30731e+07
101.414	51985500	84615600		101.436	67068190	2.4408e+07	3.98341e+07	2.75775e+07	4.47815e+07
101.461	53396700	86964500		101.486	68287217	2.48517e+07	4.05581e+07	2.8545e+07	4.64064e+07
101.507	54710700	89095200		101.535	69508764	2.52962e+07	4.12837e+07	2.94145e+07	4.78115e+07
101.553	55855000	90891200		101.585	70748710	2.57475e+07	4.20201e+07	3.01075e+07	4.88711e+07
101.6	56765700	92257500		101.634	72024240	2.62117e+07	4.27777e+07	3.0554e+07	4.94798e+07
101.646	57393000	93127500		101.683	73352341	2.6695e+07	4.35665e+07	3.0698e+07	4.9561e+07
101.693	57704300	93467700		101.733	74748311	2.7203e+07	4.43956e+07	3.05013e+07	4.90721e+07
101.739	57687200	93280100		101.782	76224386	2.77402e+07	4.52723e+07	2.9947e+07	4.80078e+07
101.786	57350100	92600400		101.832	77788651	2.83095e+07	4.62014e+07	2.90406e+07	4.6399e+07
101.832	56721400	91493800		101.881	79444293	2.8912e+07	4.71847e+07	2.78094e+07	4.43091e+07
101.925	54786600	88369400		101.931	81189284	2.95471e+07	4.82211e+07	2.52395e+07	4.01483e+07
101.971	53608300	86563600		101.98	83016485	3.02121e+07	4.93064e+07	2.33962e+07	3.72572e+07
102.018	52384100	84737700		102.029	84914183	3.09027e+07	5.04335e+07	2.14814e+07	3.43042e+07
102.064	51183600	82986100		102.079	86866974	3.16134e+07	5.15933e+07	1.95702e+07	3.13928e+07
102.111	50069600	81386300		102.128	88856892	3.23375e+07	5.27752e+07	1.77321e+07	2.86111e+07
102.157	49093300	79994600		102.178	90864704	3.30682e+07	5.39677e+07	1.60251e+07	2.60269e+07
102.203	48292000	78845000		102.227	92871196	3.37985e+07	5.51594e+07	1.44935e+07	2.36856e+07
102.25	47687200	77950000		102.277	94858343	3.45216e+07	5.63396e+07	1.31656e+07	2.16104e+07
102.296	47284700	77303300		102.326	96810265	3.5232e+07	5.7499e+07	1.20527e+07	1.98043e+07
102.343	47075800	76884700		102.376	98713848	3.59248e+07	5.86296e+07	1.1151e+07	1.82551e+07
102.389	47039900	76664700		102.425	100559012	3.65963e+07	5.97255e+07	1.04436e+07	1.69392e+07
102.435	47147500	76609700		102.475	102338586	3.72439e+07	6.07824e+07	9.90359e+06	1.58273e+07
102.482	47364400	76686500		102.524	104047848	3.7866e+07	6.17976e+07	9.49844e+06	1.48889e+07
102.528	47654500	76865700		102.573	105683759	3.84613e+07	6.27692e+07	9.19318e+06	1.40965e+07
102.575	47983800	77123300		102.623	107244024	3.90291e+07	6.36959e+07	8.95466e+06	1.34274e+07
102.621	48322700	77441500		102.672	108726061	3.95685e+07	6.45762e+07	8.7542e+06	1.28653e+07
102.714	48940600	78212400		102.722	110126030	4.0078e+07	6.54077e+07	8.86261e+06	1.28047e+07
102.76	49191900	78647300		102.771	111438022	4.05555e+07	6.61869e+07	8.63644e+06	1.24604e+07
102.807	49396100	79102500		102.821	112653512	4.09978e+07	6.69088e+07	8.39829e+06	1.21937e+07
102.853	49551600	79564400		102.87	113761144	4.14009e+07	6.75667e+07	8.15069e+06	1.19977e+07
102.9	49659200	80015100		102.92	114746899	4.17597e+07	6.81522e+07	7.89955e+06	1.18629e+07
102.946	49720000	80431500		102.969	115594607	4.20682e+07	6.86556e+07	7.65184e+06	1.17759e+07
102.993	49734000	80786700		103.019	116286814	4.23201e+07	6.90668e+07	7.41393e+06	1.17199e+07
103.039	49699300	81051800		103.068	116805860	4.2509e+07	6.9375e+07	7.19033e+06	1.16768e+07
103.085	49611500	81198600		103.118	117135114	4.26288e+07	6.95706e+07	6.98271e+06	1.1628e+07
103.132	49464600	81202200		103.167	117260221	4.26743e+07	6.96449e+07	6.79028e+06	1.15573e+07
103.178	49251000	81043700		103.216	117170244	4.26416e+07	6.95915e+07	6.60942e+06	1.14522e+07
103.225	48963500	80712600		103.266	116858561	4.25281e+07	6.94063e+07	6.43536e+06	1.13063e+07
103.271	48595800	80207800		103.315	116323476	4.23334e+07	6.90885e+07	6.26239e+06	1.11193e+07
103.318	48143900	79537900		103.365	115568419	4.20586e+07	6.86401e+07	6.08527e+06	1.08978e+07
103.364	47607400	78719900		103.414	114601761	4.17068e+07	6.80659e+07	5.90057e+06	1.0654e+07
103.41	46989000	77777400		103.464	113436228	4.12827e+07	6.73737e+07	5.70634e+06	1.04037e+07
103.457	46295300	76737600		103.513	112087993	4.0792e+07	6.65729e+07	5.5033e+06	1.01647e+07
103.55	44719700	74472400		103.563	110575515	4.02416e+07	6.56746e+07	4.47813e+06	8.79778e+06
103.596	43859700	73289600		103.612	108918265	3.96384e+07	6.46903e+07	4.22125e+06	8.59928e+06
103.643	42965300	72089400		103.662	107135428	3.89896e+07	6.36314e+07	3.97568e+06	8.45796e+06
103.689	42044200	70872800		103.711	105244753	3.83016e+07	6.25085e+07	3.74265e+06	8.3643e+06
103.735	41101000	69631700		103.76	103261620	3.75798e+07	6.13306e+07	3.52117e+06	8.30105e+06
103.782	40136900	68350200		103.81	101198449	3.6829e+07	6.01053e+07	3.30791e+06	8.24494e+06
103.828	39149900	67007400		103.859	99064464	3.60524e+07	5.88378e+07	3.09753e+06	8.16959e+06
103.875	38135500	65579700		103.909	96865867	3.52522e+07	5.7532e+07	2.88326e+06	8.04771e+06
103.921	37088100	64044900		103.958	94606364	3.44299e+07	5.619e+07	2.65816e+06	7.85491e+06
103.967	36002600	62385100		104.008	92287977	3.35862e+07	5.4813e+07	2.41639e+06	7.57208e+06
104.014	34875700	60589700		104.057	89912065	3.27216e+07	5.34019e+07	2.15415e+06	7.18782e+06
104.06	33707000	58657000		104.106	87480413	3.18366e+07	5.19576e+07	1.8704e+06	6.69936e+06
104.107	32500700	56595600		104.156	84996261	3.09326e+07	5.04822e+07	1.56815e+06	6.11338e+06
104.153	31264800	54423600		104.205	82465164	3.00114e+07	4.89789e+07	1.25339e+06	5.44469e+06
104.2	30011700	52167700		104.255	79895578	2.90763e+07	4.74527e+07	935433	4.71495e+06
104.246	28756700	49860600		104.304	77299061	2.81313e+07	4.59106e+07	625379	3.95001e+06
104.339	26308500	45235900		104.354	74690113	2.71819e+07	4.4361e+07	-873351	874859
104.385	25146400	42986900		104.403	72085609	2.6234e+07	4.28141e+07	-1.0876e+06	172764
104.432	24041300	40817800		104.453	69503884	2.52944e+07	4.12808e+07	-1.25313e+06	-462960
104.478	22999100	38747900		104.502	66963582	2.43699e+07	3.9772e+07	-1.37085e+06	-1.02409e+06
104.525	22020000	36787800		104.552	64482354	2.3467e+07	3.82983e+07	-1.44696e+06	-1.5105e+06
104.571	21098500	34939200		104.601	62075543	2.25911e+07	3.68688e+07	-1.49255e+06	-1.92961e+06
104.617	20224800	33196500		104.65	59755018	2.17465e+07	3.54906e+07	-1.52175e+06	-2.29407e+06
104.664	19385500	31547900		104.7	57528258	2.09362e+07	3.4168e+07	-1.55066e+06	-2.62012e+06
104.71	18566000	29978000		104.749	55397801	2.01608e+07	3.29027e+07	-1.59483e+06	-2.92467e+06
104.757	17752100	28469900		104.799	53361129	1.94196e+07	3.1693e+07	-1.66753e+06	-3.22312e+06
104.803	16932300	27007900		104.848	51411015	1.87099e+07	3.05348e+07	-1.77763e+06	-3.52688e+06
104.85	16099200	25579400		104.898	49536317	1.80277e+07	2.94213e+07	-1.92847e+06	-3.84193e+06
104.896	15250200	24175900		104.947	47723146	1.73678e+07	2.83444e+07	-2.11761e+06	-4.16853e+06
104.942	14388500	22794200		104.997	45956304	1.67248e+07	2.7295e+07	-2.3363e+06	-4.50084e+06
104.989	13521800	21435900		105.046	44220882	1.60932e+07	2.62643e+07	-2.57143e+06	-4.82841e+06
105.035	12661700	20106700		105.096	42503826	1.54683e+07	2.52445e+07	-2.80665e+06	-5.13779e+06
105.128	11016900	17571800		105.145	40795362	1.48466e+07	2.42298e+07	-3.82969e+06	-6.65798e+06
105.175	10258500	16385700		105.195	39090107	1.4226e+07	2.3217e+07	-3.9675e+06	-6.83127e+06
105.221	9556150	15265000		105.244	37387771	1.36065e+07	2.22059e+07	-4.05032e+06	-6.94089e+06
105.267	8914390	14215100		105.293	35693374	1.29898e+07	2.11995e+07	-4.07544e+06	-6.98443e+06
105.314	8333030	13237800		105.343	34016945	1.23797e+07	2.02038e+07	-4.0467e+06	-6.96604e+06
105.36	7807110	12331900		105.392	32372727	1.17814e+07	1.92273e+07	-3.97424e+06	-6.89538e+06
105.407	7327760	11493300		105.442	30777956	1.1201e+07	1.82801e+07	-3.87321e+06	-6.78679e+06
105.453	6883610	10716400		105.491	29251325	1.06454e+07	1.73734e+07	-3.76178e+06	-6.65697e+06
105.5	6462410	9994730		105.541	27811279	1.01213e+07	1.65181e+07	-3.6589e+06	-6.52335e+06
105.546	6052840	9322530		105.59	26474296	9.63475e+06	1.5724e+07	-3.58191e+06	-6.40147e+06
105.592	5646020	8695460		105.639	25253302	9.19039e+06	1.49988e+07	-3.54437e+06	-6.30335e+06
105.639	5236710	8111330		105.689	24156397	8.7912e+06	1.43473e+07	-3.55449e+06	-6.23599e+06
105.685	4823910	7570120		105.738	23185990	8.43804e+06	1.3771e+07	-3.61413e+06	-6.20084e+06
105.732	4410820	7073670		105.788	22338422	8.12959e+06	1.32676e+07	-3.71877e+06	-6.19389e+06
105.778	4004240	6624760		105.837	21604135	7.86236e+06	1.28314e+07	-3.85812e+06	-6.20668e+06
105.824	3613420	6225980		105.887	20968337	7.63097e+06	1.24538e+07	-4.01755e+06	-6.22784e+06
105.871	3248600	5878390		105.936	20412131	7.42855e+06	1.21235e+07	-4.17995e+06	-6.24508e+06
105.964	2633600	5326350		105.986	19913986	7.24726e+06	1.18276e+07	-4.61366e+06	-6.50125e+06
106.01	2395540	5107140		106.035	19451408	7.07892e+06	1.15529e+07	-4.68338e+06	-6.44572e+06
106.057	2205920	4909380		106.085	19002677	6.91561e+06	1.12863e+07	-4.70969e+06	-6.37697e+06
106.103	2061480	4716800		106.134	18548473	6.75032e+06	1.10166e+07	-4.68884e+06	-6.29978e+06
106.149	1955470	4511590		106.183	18073250	6.57737e+06	1.07343e+07	-4.6219e+06	-6.22274e+06
106.196	1878500	4276320		106.233	17566248	6.39286e+06	1.04332e+07	-4.51436e+06	-6.15688e+06
106.242	1819810	3996050		106.282	17022052	6.19481e+06	1.011e+07	-4.375e+06	-6.11394e+06
106.289	1768570	3660380		106.332	16440660	5.98322e+06	9.76468e+06	-4.21465e+06	-6.1043e+06
106.335	1715110	3265160		106.381	15827076	5.75992e+06	9.40025e+06	-4.04481e+06	-6.13509e+06
106.382	1651990	2813540		106.431	15190478	5.52825e+06	9.02215e+06	-3.87626e+06	-6.20861e+06
106.428	1574610	2316260		106.48	14543054	5.29263e+06	8.63762e+06	-3.71802e+06	-6.32136e+06
106.474	1481430	1790990		106.53	13898635	5.05811e+06	8.25488e+06	-3.57668e+06	-6.46389e+06
106.521	1373710	1260870		106.579	13271256	4.82979e+06	7.88226e+06	-3.45608e+06	-6.62139e+06
106.567	1254900	752207		106.629	12673786	4.61235e+06	7.5274e+06	-3.35745e+06	-6.77519e+06
106.614	1129800	291716		106.678	12116770	4.40964e+06	7.19657e+06	-3.27984e+06	-6.90485e+06
106.66	1003550	-96405		106.728	11607564	4.22432e+06	6.89413e+06	-3.22077e+06	-6.99054e+06
106.753	764955	-587494		106.777	11149856	4.05775e+06	6.62229e+06	-3.29279e+06	-7.20978e+06
106.799	657799	-676743		106.826	10743587	3.9099e+06	6.38099e+06	-3.2521e+06	-7.05773e+06
106.846	559454	-668029		106.876	10385262	3.77949e+06	6.16817e+06	-3.22004e+06	-6.8362e+06
106.892	468653	-577095		106.925	10068608	3.66425e+06	5.98009e+06	-3.1956e+06	-6.55719e+06
106.939	383275	-426693		106.975	9785484	3.56122e+06	5.81194e+06	-3.17794e+06	-6.23863e+06
106.985	301032	-244021		107.024	9526928	3.46712e+06	5.65837e+06	-3.16609e+06	-5.90239e+06
107.032	220171	-57627		107.074	9284235	3.3788e+06	5.51423e+06	-3.15863e+06	-5.57186e+06
107.078	140047	105852		107.123	9049936	3.29353e+06	5.37507e+06	-3.15348e+06	-5.26922e+06
107.124	61477	224732		107.172	8818575	3.20933e+06	5.23766e+06	-3.14785e+06	-5.01292e+06
107.171	-13195	284685		107.222	8587201	3.12513e+06	5.10024e+06	-3.13832e+06	-4.81555e+06
107.217	-80364	280260		107.271	8355533	3.04082e+06	4.96264e+06	-3.12118e+06	-4.68238e+06
107.264	-135675	215270		107.321	8125779	2.9572e+06	4.82618e+06	-3.09288e+06	-4.61091e+06
107.31	-174748	102044		107.37	7902156	2.87582e+06	4.69336e+06	-3.05057e+06	-4.59132e+06
107.356	-193954	-40380		107.42	7690153	2.79866e+06	4.56745e+06	-2.99262e+06	-4.60783e+06
107.403	-191141	-188918		107.469	7495628	2.72787e+06	4.45191e+06	-2.91901e+06	-4.64083e+06
107.449	-166175	-319555		107.519	7323868	2.66536e+06	4.3499e+06	-2.83154e+06	-4.66945e+06
107.496	-121204	-410596		107.568	7178708	2.61254e+06	4.26368e+06	-2.73374e+06	-4.67428e+06
107.589	9452	-415514		107.618	7061807	2.56999e+06	4.19425e+06	-2.56054e+06	-4.60977e+06
107.635	81586	-320186		107.667	6972183	2.53738e+06	4.14102e+06	-2.45579e+06	-4.46121e+06
107.681	148141	-168308		107.716	6906070	2.51331e+06	4.10175e+06	-2.36517e+06	-4.27006e+06
107.728	202066	23414		107.766	6857101	2.49549e+06	4.07267e+06	-2.29343e+06	-4.04926e+06
107.774	237763	232243		107.815	6816823	2.48084e+06	4.04875e+06	-2.24307e+06	-3.8165e+06
107.821	251763	432079		107.865	6775490	2.46579e+06	4.0242e+06	-2.21403e+06	-3.59212e+06
107.867	243103	596553		107.914	6723047	2.44671e+06	3.99305e+06	-2.2036e+06	-3.3965e+06
107.914	213391	702118		107.964	6650216	2.4202e+06	3.94979e+06	-2.20681e+06	-3.24768e+06
107.96	166540	730786		108.013	6549555	2.38357e+06	3.89001e+06	-2.21703e+06	-3.15922e+06
108.006	108214	672156		108.063	6416384	2.3351e+06	3.81091e+06	-2.22689e+06	-3.13876e+06
108.053	45088	524549		108.112	6249452	2.27435e+06	3.71177e+06	-2.22926e+06	-3.18722e+06
108.099	-15998	295103		108.162	6051317	2.20225e+06	3.59409e+06	-2.21824e+06	-3.29898e+06
108.146	-68851	-1108		108.211	5828309	2.12109e+06	3.46163e+06	-2.18994e+06	-3.46274e+06
108.192	-108603	-342828		108.26	5590141	2.03441e+06	3.32018e+06	-2.14301e+06	-3.66301e+06
108.239	-132192	-704940		108.31	5349142	1.9467e+06	3.17704e+06	-2.0789e+06	-3.88198e+06
108.285	-138573	-1061110		108.359	5119194	1.86302e+06	3.04047e+06	-2.00159e+06	-4.10158e+06
108.378	-105139	-1659330		108.409	4914479	1.78852e+06	2.91888e+06	-1.89366e+06	-4.57821e+06
108.424	-71847	-1863990		108.458	4748122	1.72798e+06	2.82007e+06	-1.79982e+06	-4.68406e+06
108.471	-33417	-1990570		108.508	4630887	1.68531e+06	2.75044e+06	-1.71873e+06	-4.74101e+06
108.517	5348	-2035760		108.557	4570036	1.66317e+06	2.7143e+06	-1.65782e+06	-4.75006e+06
108.564	39936	-2002280		108.607	4568469	1.6626e+06	2.71337e+06	-1.62266e+06	-4.71565e+06
108.61	66480	-1897790		108.656	4624225	1.68289e+06	2.74649e+06	-1.61641e+06	-4.64428e+06
108.656	81984	-1733540		108.706	4730420	1.72153e+06	2.80956e+06	-1.63955e+06	-4.5431e+06
108.703	84399	-1522920		108.755	4875609	1.77437e+06	2.89579e+06	-1.68997e+06	-4.41871e+06
108.749	72604	-1280020		108.805	5044572	1.83586e+06	2.99615e+06	-1.76326e+06	-4.27617e+06
108.796	46304	-1018550		108.854	5219444	1.8995e+06	3.10001e+06	-1.8532e+06	-4.11856e+06
108.842	5924	-751112		108.903	5381107	1.95834e+06	3.19603e+06	-1.95241e+06	-3.94714e+06
108.889	-47487	-488831		108.953	5510720	2.00551e+06	3.27301e+06	-2.05299e+06	-3.76184e+06
108.935	-112310	-241378		109.002	5591240	2.03481e+06	3.32083e+06	-2.14712e+06	-3.56221e+06
108.981	-186347	-17194		109.052	5608833	2.04121e+06	3.33128e+06	-2.22756e+06	-3.34847e+06
109.028	-266798	176191		109.101	5554014	2.02126e+06	3.29872e+06	-2.28806e+06	-3.12253e+06
109.074	-350228	331908		109.151	5422454	1.97338e+06	3.22058e+06	-2.32361e+06	-2.88867e+06
109.121	-432594	443684		109.2	5215347	1.89801e+06	3.09757e+06	-2.33061e+06	-2.65389e+06
109.213	-575694	514830		109.249	4939347	1.79757e+06	2.93365e+06	-2.37326e+06	-2.41882e+06
109.26	-626895	467818		109.299	4606044	1.67627e+06	2.73569e+06	-2.30317e+06	-2.26787e+06
109.306	-658789	365585		109.348	4231052	1.5398e+06	2.51297e+06	-2.19859e+06	-2.14738e+06
109.353	-668277	212196		109.398	3832783	1.39486e+06	2.27642e+06	-2.06314e+06	-2.06423e+06
109.399	-653842	15684		109.447	3431001	1.24864e+06	2.03779e+06	-1.90248e+06	-2.02211e+06
109.446	-615949	-211860		109.497	3045298	1.10827e+06	1.80871e+06	-1.72422e+06	-2.02057e+06
109.492	-557275	-454727		109.546	2693607	980280	1.59983e+06	-1.53755e+06	-2.05455e+06
109.538	-482686	-694540		109.596	2390885	870111	1.42003e+06	-1.3528e+06	-2.11457e+06
109.585	-398926	-911708		109.645	2148059	781740	1.27581e+06	-1.18067e+06	-2.18751e+06
109.631	-314033	-1087240		109.695	1971322	717420	1.17084e+06	-1.03145e+06	-2.25808e+06
109.678	-236504	-1204710		109.744	1861845	677578	1.10581e+06	-914082	-2.31052e+06
109.724	-174331	-1252080		109.793	1815882	660851	1.07852e+06	-835182	-2.3306e+06
109.771	-133998	-1223280		109.843	1825284	664273	1.0841e+06	-798271	-2.30738e+06
109.817	-119590	-1119100		109.892	1878345	683583	1.11561e+06	-803173	-2.23471e+06
109.863	-132142	-947444		109.942	1960912	713631	1.16465e+06	-845773	-2.1121e+06
109.91	-169338	-722693		109.991	2057653	748838	1.22211e+06	-918176	-1.9448e+06
110.003	-292800	-195182		110.041	2153366	783671	1.27896e+06	-1.07647e+06	-1.47414e+06
110.049	-360867	61475		110.09	2234238	813103	1.32699e+06	-1.17397e+06	-1.26552e+06
110.096	-419334	283919		110.14	2288935	833008	1.35948e+06	-1.25234e+06	-1.07556e+06
110.142	-458538	454551		110.189	2309442	840471	1.37166e+06	-1.29901e+06	-917106
110.188	-470952	561670		110.239	2291595	833976	1.36106e+06	-1.30493e+06	-799388
110.235	-452306	600597		110.288	2235272	813479	1.32761e+06	-1.26578e+06	-727008
110.281	-402296	573939		110.338	2144235	780348	1.27354e+06	-1.18264e+06	-699596
110.328	-324843	491001		110.387	2025645	737190	1.2031e+06	-1.06203e+06	-712100
110.374	-227792	366388		110.436	1889328	687580	1.12214e+06	-915372	-755749
110.421	-122109	218065		110.486	1746809	635713	1.03749e+06	-757822	-819425
110.467	-20639	65067		110.535	1610257	586018	956387	-606657	-891320
110.513	63413	-74777		110.585	1491403	542764	885796	-479351	-960573
110.56	118100	-186836		110.634	1400510	509685	831811	-391585	-1.01865e+06
110.606	134242	-261118		110.684	1345510	489669	799145	-355427	-1.06026e+06
110.653	106634	-292996		110.733	1331351	484516	790735	-377882	-1.08373e+06
110.699	34799	-283166		110.782	1359595	494795	807510	-459996	-1.09068e+06
110.745	-76808	-236873		110.832	1428324	519808	848331	-596616	-1.0852e+06
110.838	-379759	-70259		110.881	1532318	557654	910097	-937413	-980356
110.885	-543630	30284		110.931	1663508	605398	988015	-1.14903e+06	-957731
110.931	-695296	130989		110.98	1811646	659309	1.076e+06	-1.35461e+06	-945010
110.978	-820284	226578		111.03	1965144	715172	1.16717e+06	-1.53546e+06	-940589
111.024	-906710	315035		111.079	2112011	768621	1.2544e+06	-1.67533e+06	-939361
111.07	-946513	397403		111.129	2240798	815490	1.33089e+06	-1.762e+06	-933484
111.117	-936243	476985		111.178	2341486	852133	1.39069e+06	-1.78838e+06	-913705
111.163	-877312	558083		111.228	2406262	875707	1.42916e+06	-1.75302e+06	-871079
111.21	-775712	644512		111.277	2430088	884378	1.44331e+06	-1.66009e+06	-798801
111.256	-641235	738161		111.326	2411054	877451	1.43201e+06	-1.51869e+06	-693847
111.303	-486326	837840		111.376	2350473	855404	1.39603e+06	-1.34173e+06	-558187
111.349	-324699	938679		111.425	2252727	819831	1.33797e+06	-1.14453e+06	-399293
111.395	-169897	1032170		111.475	2124848	773292	1.26202e+06	-943189	-229851
111.442	-33956	1106930		111.524	1975932	719098	1.17357e+06	-753054	-66644.3
111.488	73669	1150040		111.574	1816349	661021	1.07879e+06	-587352	71247.5
111.535	146849	1148890		111.623	1656892	602990	984085	-456141	164805
111.628	183413	976755		111.673	1507896	548766	895592	-365353	81163.4
111.674	151966	799122		111.722	1378387	501634	818672	-349668	-19549.7
111.72	95208	566238		111.772	1275364	464141	757483	-368933	-191245
111.767	21023	290504		111.821	1203248	437896	714651	-416873	-424147
111.813	-62253	-10110		111.871	1163548	423448	691071	-485701	-701181
111.86	-146750	-313731		111.92	1154784	420259	685866	-567009	-999597
111.906	-225825	-596857		111.969	1172665	426766	696486	-652591	-1.29334e+06
111.953	-294598	-836947		112.019	1210497	440534	718956	-735132	-1.5559e+06
111.999	-350240	-1014990		112.068	1259830	458488	748257	-808728	-1.76325e+06
112.045	-391999	-1117760		112.118	1311248	477200	778796	-869199	-1.89656e+06
112.092	-420987	-1139340		112.167	1355257	493216	804934	-914203	-1.94427e+06
112.138	-439790	-1081870		112.217	1383202	503386	821531	-943176	-1.9034e+06
112.185	-451946	-955285		112.266	1388122	505177	824454	-957123	-1.77974e+06
112.231	-461375	-776072		112.316	1365473	496934	811002	-958309	-1.58707e+06
112.278	-471800	-565312		112.365	1313653	478076	780224	-949876	-1.34554e+06
112.324	-486254	-346132		112.414	1234268	449185	733074	-935439	-1.07921e+06
112.37	-506679	-140983		112.464	1132127	412013	672409	-918692	-813392
112.463	-566408	155851		112.513	1014936	369364	602806	-935772	-446955
112.51	-602673	226658		112.563	892718	324885	530216	-927558	-303558
112.556	-639114	243524		112.612	777002	282773	461488	-921887	-217964
112.602	-671578	213375		112.662	679841	247413	403781	-918991	-190406
112.649	-695555	148615		112.711	612731	222990	363922	-918545	-215307
112.695	-706700	65181		112.761	585539	213094	347772	-919794	-282591
112.742	-701342	-19761		112.81	605524	220367	359642	-921709	-379403
112.788	-676994	-90172		112.859	676529	246208	401814	-923202	-491986
112.835	-632732	-133230		112.909	798454	290580	474229	-923312	-607459
112.881	-569485	-140897		112.958	967024	351927	574349	-921412	-715246
112.927	-490110	-110766		113.008	1173918	427222	697230	-917332	-807996
112.974	-399302	-46126		113.057	1407242	512135	835810	-911437	-881936
113.02	-303276	44731		113.107	1652324	601328	981372	-904604	-936641
113.067	-209268	149833		113.156	1892772	688833	1.12418e+06	-898101	-974350
113.113	-124891	255247		113.206	2111707	768510	1.25422e+06	-893401	-998969
113.16	-57386	346973		113.255	2293080	834517	1.36194e+06	-891903	-1.01497e+06
113.252	4271	443306		113.305	2422961	881784	1.43908e+06	-877513	-995774
113.299	-7965	433672		113.354	2490677	906428	1.4793e+06	-914393	-1.04563e+06
113.345	-49070	383143		113.403	2489719	906079	1.47873e+06	-955149	-1.09559e+06
113.392	-115957	295228		113.453	2418315	880093	1.43632e+06	-996050	-1.14109e+06
113.438	-203287	176878		113.502	2279637	829625	1.35396e+06	-1.03291e+06	-1.17708e+06
113.485	-304055	37403		113.552	2081588	757549	1.23633e+06	-1.0616e+06	-1.19892e+06
113.531	-410386	-112765		113.601	1836221	668253	1.0906e+06	-1.07864e+06	-1.20336e+06
113.577	-514462	-263266		113.651	1558788	567287	925818	-1.08175e+06	-1.18908e+06
113.624	-609453	-404806		113.7	1266553	460935	752250	-1.07039e+06	-1.15706e+06
113.67	-690333	-529826		113.75	977410	355707	580518	-1.04604e+06	-1.11034e+06
113.717	-754468	-632807		113.799	708479	257836	420790	-1.0123e+06	-1.0536e+06
113.763	-801889	-710210		113.849	474751	172775	281971	-974664	-992181
113.81	-835201	-760146		113.898	287952	104794	171025	-939995	-931171
113.856	-859134	-781890		113.947	155666	56651.3	92455.4	-915785	-874345
113.902	-879779	-775363		113.997	80855	29425.4	48022.6	-909204	-823386
113.949	-903621	-740738		114.046	61755	22474.4	36678.4	-926095	-777416
113.995	-936483	-678236		114.096	92199	33553.8	54760.2	-970037	-732996
114.088	-1043580	-471237		114.145	162321	59073.2	96408.1	-1.10265e+06	-567645
114.134	-1118520	-328928		114.195	259553	94458.7	154158	-1.21298e+06	-483086
114.181	-1203400	-164049		114.244	369857	134601	219671	-1.338e+06	-383720
114.227	-1291770	18867		114.294	479047	174339	284523	-1.46611e+06	-265656
114.274	-1375470	213361		114.343	574095	208929	340975	-1.5844e+06	-127614
114.32	-1445680	411114		114.392	644295	234477	382669	-1.68016e+06	28444.9
114.367	-1494090	602377		114.442	682186	248267	405174	-1.74236e+06	197203
114.413	-1514100	776720		114.491	684132	248975	406330	-1.76308e+06	370390
114.459	-1501760	924020		114.541	650548	236753	386383	-1.73851e+06	537637
114.506	-1456420	1035550		114.59	585712	213157	347875	-1.66958e+06	687675
114.552	-1380910	1105020		114.64	497224	180954	295319	-1.56186e+06	809701
114.599	-1281270	1129420		114.689	395153	143807	234695	-1.42508e+06	894725
114.645	-1166010	1109380		114.739	290950	105885	172805	-1.27189e+06	936575
114.692	-1045080	1049230		114.788	196266	71426.8	116569	-1.11651e+06	932661
114.738	-928567	956346		114.838	121759	44311.6	72316.9	-972879	884029
114.784	-825432	840251		114.887	76016	27664.4	45148.5	-853096	795102
114.877	-683036	578862		114.936	64708	23549.1	38432.3	-706585	540430
114.924	-647625	450686		114.986	90038	32767.4	53476.7	-680392	397209
114.97	-633047	331028		115.035	150528	54781.4	89403.8	-687828	241624
115.017	-633491	220412		115.085	241192	87776.6	143252	-721268	77159.7
115.063	-641392	115517		115.134	354029	128841	210270	-770233	-94753.1
115.109	-648634	9762		115.184	478827	174259	284392	-822893	-274630
115.156	-647808	-105547		115.233	604152	219868	358827	-867676	-464374
115.202	-633327	-239663		115.283	718467	261471	426722	-894798	-666385
115.249	-602250	-400647		115.332	811226	295228	481815	-897478	-882462
115.295	-554683	-593703		115.382	873876	318028	519025	-872711	-1.11273e+06
115.342	-493709	-819830		115.431	900632	327766	534916	-821475	-1.35475e+06
115.388	-424851	-1075040		115.481	888998	323532	528007	-748383	-1.60305e+06
115.434	-355172	-1350250		115.53	839939	305678	498869	-660850	-1.84912e+06
115.481	-292138	-1631950		115.579	757732	275760	450043	-567898	-2.08199e+06
115.527	-242439	-1903510		115.629	649498	236371	385759	-478810	-2.28927e+06
115.574	-210944	-2147050		115.678	524463	190867	311497	-401811	-2.45855e+06
115.62	-199955	-2345590		115.728	393044	143040	233442	-342995	-2.57903e+06
115.713	-234355	-2556340		115.777	265824	96740.9	157882	-331096	-2.71422e+06
115.759	-270860	-2556100		115.827	152549	55516.9	90604.1	-326377	-2.6467e+06
115.806	-311608	-2487620		115.876	61220	22279.7	36360.7	-333888	-2.52398e+06
115.852	-349699	-2360280		115.925	-2633	-958.223	-1563.83	-348741	-2.35872e+06
115.899	-379251	-2188400		115.975	-36417	-13253.2	-21629.3	-365998	-2.16677e+06
115.945	-396380	-1989500		116.024	-40646	-14792.2	-24141.1	-381588	-1.96536e+06
115.991	-399835	-1782090		116.074	-18833	-6853.86	-11185.6	-392981	-1.7709e+06
116.038	-391205	-1583450		116.123	22918	8340.51	13611.8	-399546	-1.59706e+06
116.084	-374631	-1407550		116.173	76544	27856.5	45462.1	-402488	-1.45301e+06
116.131	-356095	-1263610		116.222	132805	48331.5	78877.5	-404427	-1.34249e+06
116.177	-342356	-1155250		116.272	182171	66297.2	108198	-408653	-1.26345e+06
116.224	-339731	-1080600		116.321	215688	78495	128105	-418226	-1.2087e+06
116.27	-352906	-1033090		116.371	225769	82163.7	134092	-435070	-1.16718e+06
116.316	-383956	-1003070		116.42	206826	75269.8	122841	-459226	-1.12591e+06
116.363	-431772	-979690		116.469	155702	56664.4	92476.8	-488436	-1.07217e+06
116.409	-491969	-953090		116.519	71859	26151.5	42679.5	-518121	-995770
116.502	-618696	-866670		116.568	-42652	-15522.3	-25332.5	-603174	-841338
116.549	-666294	-806705		116.618	-183471	-66770.3	-108970	-599524	-697735
116.595	-691101	-743918		116.667	-344343	-125316	-204517	-565785	-539401
116.641	-686273	-689978		116.717	-517705	-188408	-307483	-497865	-382495
116.688	-648262	-659116		116.766	-695296	-253038	-412960	-395224	-246156
116.734	-577510	-666035		116.816	-868791	-316178	-516005	-261332	-150030
116.781	-478595	-723654		116.865	-1030375	-374983	-611975	-103612	-111679
116.827	-359789	-840963		116.915	-1173201	-426961	-696805	67172.1	-144158
116.874	-232088	-1021310		116.964	-1291741	-470101	-767210	238013	-254100
116.92	-107844	-1261380		117.013	-1381973	-502939	-820802	395095	-440578
116.966	816	-1550980		117.063	-1441440	-524581	-856121	525397	-694859
117.013	83542	-1873650		117.112	-1469194	-534681	-872605	618223	-1.00104e+06
117.059	133072	-2208110		117.162	-1465648	-533391	-870499	666463	-1.33761e+06
117.106	146110	-2530240		117.211	-1432386	-521286	-850744	667396	-1.6795e+06
117.152	123649	-2815380		117.261	-1371947	-499290	-814847	622939	-2.00053e+06
117.199	70694	-3040730		117.31	-1287649	-468612	-764779	539306	-2.27595e+06
117.291	-92036	-3242210		117.36	-1183425	-430682	-702877	338646	-2.53933e+06
117.338	-181144	-3198320		117.409	-1063730	-387122	-631786	205978	-2.56653e+06
117.384	-262380	-3055860		117.459	-933478	-339719	-554425	77339.1	-2.50144e+06
117.431	-328549	-2821310		117.508	-798009	-290418	-473965	-38130.9	-2.34734e+06
117.477	-375639	-2506540		117.557	-663057	-241305	-393812	-134334	-2.11273e+06
117.523	-403156	-2127500		117.607	-534686	-194587	-317569	-208569	-1.80993e+06
117.57	-413898	-1702590		117.656	-419173	-152549	-248961	-261349	-1.45363e+06
117.616	-413202	-1251220		117.706	-322805	-117478	-191725	-295724	-1.05949e+06
117.663	-407801	-792443		117.755	-251578	-91556.4	-149421	-316245	-643022
117.709	-404484	-343983		117.805	-210822	-76724.1	-125214	-327760	-218769
117.756	-408776	78445		117.854	-204748	-74513.6	-121607	-334262	200052
117.802	-423856	461450		117.904	-235963	-85873.6	-140147	-337982	601597
117.848	-449896	794049		117.953	-305017	-111004	-181160	-338892	975209
117.895	-483934	1067610		118.002	-410014	-149216	-243521	-334718	1.31113e+06
117.941	-520301	1275780		118.052	-546381	-198844	-324515	-321457	1.60029e+06
117.988	-551545	1414490		118.101	-706812	-257229	-419800	-294316	1.83429e+06
118.081	-567729	1479290		118.151	-881467	-320791	-523534	-246938	2.00282e+06
118.127	-540828	1410060		118.2	-1058410	-385185	-628626	-155643	2.03869e+06
118.173	-487488	1281160		118.25	-1224312	-445562	-727161	-41926.1	2.00832e+06
118.22	-410020	1102510		118.299	-1365368	-496896	-810939	86876.1	1.91345e+06
118.266	-314501	886828		118.349	-1468371	-534382	-872116	219881	1.75894e+06
118.359	-107955	405100		118.398	-1521870	-553852	-903891	445897	1.30899e+06
118.406	-19449	170874		118.448	-1517291	-552185	-901172	532736	1.07205e+06
118.452	45338	-39646		118.497	-1449940	-527674	-861170	573012	821524
118.498	79294	-215779		118.546	-1319748	-480294	-783844	559588	568065
118.545	79485	-351498		118.596	-1131687	-411853	-672148	491338	320650
118.591	47819	-446275		118.645	-895800	-326007	-532047	373826	85771.6
118.638	-8979	-505308		118.695	-626761	-228096	-372255	219117	-133053
118.684	-80103	-538965		118.744	-343025	-124837	-203734	44733.5	-335231
118.731	-152024	-561489		118.794	-65580	-23866.4	-38950.2	-128158	-522539
118.777	-210309	-589036		118.843	183616	66823.1	109056	-277132	-698092
118.823	-241655	-637314		118.893	383369	139519	227696	-381174	-865010
118.916	-187288	-841832		118.942	515042	187438	305901	-374726	-1.14773e+06
118.963	-96171	-1006220		118.992	564221	205336	335110	-301507	-1.34133e+06
119.009	31413	-1205130		119.041	522128	190017	310110	-158604	-1.51524e+06
119.056	183935	-1423980		119.09	386615	140700	229624	43234.8	-1.6536e+06
119.102	345721	-1642020		119.14	162653	59194	96605.2	286527	-1.73863e+06
119.148	498831	-1834670		119.189	-137754	-50132.6	-81816.9	548964	-1.75285e+06
119.195	625287	-1976560		119.239	-496265	-180605	-294749	805892	-1.68181e+06
119.241	709355	-2044880		119.288	-889428	-323688	-528262	1.03304e+06	-1.51662e+06
119.288	739595	-2022710		119.338	-1290407	-469616	-766417	1.20921e+06	-1.25629e+06
119.334	710392	-1901650		119.387	-1671014	-608129	-992473	1.31852e+06	-909177
119.38	622785	-1683570		119.437	-2003926	-729286	-1.1902e+06	1.35207e+06	-493369
119.427	484463	-1381080		119.486	-2264873	-824252	-1.34519e+06	1.30871e+06	-35893.6
119.473	308957	-1016580		119.535	-2434622	-886028	-1.44601e+06	1.19498e+06	429426
119.52	114114	-620022		119.585	-2500562	-910025	-1.48517e+06	1.02414e+06	865148
119.566	-79930	-225634		119.634	-2457773	-894453	-1.45976e+06	814523	1.23412e+06
119.613	-253033	132079		119.684	-2309460	-840478	-1.37167e+06	587445	1.50375e+06
119.705	-468856	622206		119.733	-2066696	-752129	-1.22748e+06	283273	1.84969e+06
119.798	-447056	710577		119.783	-1747533	-635977	-1.03792e+06	188921	1.7485e+06
119.845	-345500	609021		119.832	-1375508	-500586	-816962	155086	1.42598e+06
119.891	-194080	435149		119.882	-977696	-355811	-580687	161731	1.01584e+06
119.938	-6007	217731		119.931	-582472	-211978	-345950	205971	563681
119.984	203268	-10684		119.981	-217180	-79038	-128991	282306	118307
120.03	417896	-217958		120.03	94082	34239.1	55878.6	383657	-273837

## Sheet: Hydrolysis degree
	Time (h)	NTT	std	LTT	std
PPA	1	11.2991	0.61649	20.0619	1.66462
	2	18.9686	1.04856	28.2907	1.31296
	4	33.1381	1.56371	40.9093	2.20704
	6	47.9034	4.70744	54.0051	1.81988
	8	56.7	0.40359	67.0729	2.75845
	12	65.2932	1.08223	72.2085	3.05593
	24	76.8864	0.08807	79.0729	0.78279
	48	77.1407	1.7592	81.3949	1.29736
	Time (h)	NTT	std	LTT	std
AAG	0	0	0	0	0
	1	11.4178	1.34073	17.5195	1.48484
	2	30.6636	1.44177	37.4771	1.54123
	4	48.9941	0.81554	57.0534	0.15877
	6	64.0958	1.30407	74.5195	1.36509
	8	77.5983	2.68145	81.5644	2.15907
	12	83.4288	2.41351	87.5136	1.7592
	24	87.2593	1.81988	91.9373	2.20899
	48	92.5475	1.84948	95.8695	0.38389
	Time (d)	NTT	std	LTT	std
HCl	0	0	0	0	0
	0.5	8.27669	0.08807	9.62415	0.45816
	1	15.8572	0.62702	18.0013	0.47682
	2	23.4419	0.25007	29.353	0.05825
	4	45.3331	0.63965	50.9771	0.15877
	6	63.1068	0.40359	67.8356	1.52542
	8	66.361	0.72089	70.9881	0.9925
	10	68.5729	0.95263	72.3102	0.61649
	12	73.2932	0.98071	76.8695	1.64529
	14	77.9034	0.76271	80.7848	0.38389
